## **Bioinformatics and next generation sequencing data analysis to identify key genes and pathways influencing in Parkinson's disease**

Basavaraj Vastrad<sup>1</sup>, Chanabasayya Vastrad\*<sup>2</sup>

1. Department of Pharmaceutical Chemistry, K.L.E. College of Pharmacy, Gadag, Karnataka 582101, India.

2. Biostatistics and Bioinformatics, Chanabasava Nilaya, Bharthinagar, Dharwad 580001, Karnataka, India.

\* Chanabasayya Vastrad

channu.vastrad@gmail.com

Ph: +919480073398

Chanabasava Nilaya, Bharthinagar,

Dharwad 580001 , Karanataka, India

## Abstract

Parkinson's disease (PD) is the most commonly diagnosed neurodegenerative disorder. Identification of novel prognostic and pathogenesis biomarkers plays a pivotal role in the management of the PD. Next generation sequencing (NGS) dataset from the GEO (Gene Expression Omnibus) database were used to identify differentially expressed genes (DEGs) in PD. Gene Ontology (GO) and REACTOME pathway enrichment analyses were performed to elucidate the functional roles of the DEGs. Protein-protein interaction (PPI), modules, miRNA-hub gene regulatory network and TF-hub gene regulatory network were established. The receiver operating characteristic curve (ROC) analysis was used to explore the diagnostic values of hub genes in PD. In total, 957 DEGs were identified, of which 478 were up regulated genes and 479 were down regulated genes. GO and pathway enrichment analysis results revealed that the up regulated genes were mainly enriched in nervous system development, cell junction, transporter activity and neuronal system, whereas down regulated genes were mainly enriched in response to stimulus, cell periphery, identical protein binding and immune system. The top hub genes in the constructed PPI network, modules, miRNA-hub gene regulatory network and TF-hub gene regulatory network were OTUB1, PPP2R1A, AP2M1, PIN1, USP11, CDK2, IQGAP1, NEDD4, VIM and CDK1. Furthermore, ROC analysis showed that hub genes were having good diagnostic values. We identified a series of essential genes along with the pathways that were most closely related with PD initiation and progression. Our results provide a more detailed molecular mechanism for the advancement of PD, shedding light on the potential biomarkers and therapeutic targets.

**Keywords:** Parkinson's disease; microRNAs; hub gene; bioinformatics analysis; biomarkers

## Introduction

Parkinson's disease (PD) is the second most common type of neurodegenerative disorder and a leading cause of impairment of voluntary motor control, which places a great burden on the economy of health and reduces quality of life [1]. PD accounts for 1-2 per 1000 of the population at any time [2]. PD involves the degeneration of dopaminergic neurons in the substantia nigra of the midbrain and the advancement of neuronal Lewy Bodies [3]. Numerous factors might affect PD progression, including genetic factors [4], aging and inflammatory factors [5], and environmental factors [6]. However, how these factors affect the development of PD requires further investigation and no effective method has been developed for treatment and diagnosis. It is therefore urgent to identify novel diagnostic and prognostic biomarkers for PD.

Molecular biology investigations have identified numerous biomarkers and signaling pathways that contribute to PD, including the brain-derived neurotrophic factor (BDNF) [7], histone deacetylase 4 (HDAC4) [8], vacuolar protein sorting 35 (VPS35) [9], leucine-rich repeat kinase 2 (LRRK2) [10], phosphatidylinositol binding clathrin assembly protein (PICALM) [11], RhoA-ROCK signaling pathways [12], Nrf2 signaling pathways [13], GTPase-p38 MAPK signaling pathways [14], JAK/STAT signaling pathway [15] and PI3K/Akt signaling pathway [16]. Further investigation into the molecular events linked with PD is required.

With the advance of the human genome project, PD has been investigated at the genetic level. Next generation sequencing (NGS) technology can be used to find genes that cause early PD. NGS technology has the characteristics of high sensitivity. NGS technology is extensively used in disease diagnosis [17] and novel therapeutic target screening [18]. At present, NGS technology was used to find potential biomarkers that affect the advancement of diseases in studies [19]. NGS technology plays an important role in elucidating gene expression in PD [20]. However, the pathogenesis of PD remains unclear.

In this investigation, we explored novel biomarkers for PD diagnosis and targeting therapies. We manipulated the NGS data of GSE135036 [21] dataset from the GEO (Gene Expression Omnibus) (<http://www.ncbi.nlm.nih.gov/geo/>)

[22] database to distinguish differentially expressed genes (DEGs) between PD and normal control. gene ontology (GO) and pathway enrichment analysis were done to elucidate the functions of the DEGs. The hub genes, miRNAs (micro RNA) and TFs (transcription factors) related to the pathogenesis of PD were chosen by protein-protein interaction (PPI) network, modules, miRNA-hub gene regulatory network and TF-hub gene regulatory network. Receiver operating characteristic curve (ROC) analysis was performed to validate the hub genes, which could be used as molecular biomarkers or diagnostic or therapeutic targets for PD therapy. Collectively, our investigation will help the advancement of a genetic diagnosis for PD and more effective measures of prevention and interference.

## **Materials and methods**

### **Data resources**

The GEO database is a public genome database. In this investigation, NGS dataset GSE135036 [21] was downloaded from the GEO database. GSE135036 was based on Illumina NextSeq 500 (Homo sapiens) platform. GSE135036 dataset contained 25 samples, including 13 PD samples and 12 normal control samples.

### **Identification of DEGs**

The DESeq2 package of R software [23] was used for the screening of differentially expressed genes (DEGs) with the criteria of fold change  $> 0.513$  for up regulated genes, fold change  $< -0.61$  for down regulated genes and adjusted  $P < 0.05$ . The results were visualized as a volcano plot and heat map using the ggplot2 and gplot in R software.

### **GO and pathway enrichment analyses of DEGs**

We used GO analysis (<http://www.geneontology.org>) [24] to explore the potential functions of the DEGs. GO is a widely used bioinformatics tool to identify genes and study-related biological processes. Three terms comprised the GO analysis, including cellular component (CC), biological process (BP), and molecular function (MF). We employed KEGG to search for potential pathways of the overlapping DEGs. REACTOME (<https://reactome.org/>) [25] is a database to study gene functions and pathways from big datasets sourced from high-throughput experiments. g:Profiler (<http://biit.cs.ut.ee/gprofiler/>) [26], an online biological

database, was used to analyze the GO and REACTOME terms. A value of  $p < 0.05$  was considered significant.

### **Construction of the PPI network and module analysis**

The HIPPIE interactome (<http://cbdm-01.zdv.uni-mainz.de/~mschaefer/hippie/index.php>) is a database for searching between known proteins and predicting the interactions between proteins [27]. We used it to build PPI network for DEGs. The interaction networks were visualized with Cytoscape software version 3.8.2 (<http://www.cytoscape.org/>) [28]. Centrality analysis includes analyzing the degree [29], betweenness [30], stress [31] and closeness [32] of network nodes. Cytoscape plug-in Network Analyzer was used to calculate the values of degree, betweenness, stress and closeness to predict the key genes [33]. Functional modules in the network were identified by using the plug-in PEWCC1 [34] of Cytoscape.

### **miRNA-hub gene regulatory network construction**

miRNet database (<https://www.mirnet.ca/>) [35] is a comprehensive database, which provides the largest available set of predicted and experimentally validated miRNA-hub gene interactions. Additionally, it not only records miRNA binding sites in the entire sequence of genes but also compared this information with the binding sites of 14 existing miRNA-hub gene prediction programs: TarBase, miRTarBase, miRecords, miRanda (S masoni only), miR2Disease, HMDD, PhenomiR, SM2miR, PharmacomiR, EpimiR, starBase, TransmiR, ADmiRE, and TAM 2.0. Cytoscape software version 3.8.2 [28] was used to construct a miRNA-hub gene regulatory network and analyze the interactions of the miRNAs and hub genes.

### **TF-hub gene regulatory network construction**

NetworkAnalyst database (<https://www.networkanalyst.ca/>) [36] is a comprehensive database, which provides the largest available set of predicted and experimentally validated TF-hub gene interactions. Additionally, it not only records TF binding sites in the entire sequence of genes but also compared this information with the binding sites of existing TF-hub gene prediction program

Jasper. Cytoscape software version 3.8.2 [28] was used to construct a TF-hub gene regulatory network and analyze the interactions of the TFs and hub genes.

### **Receiver operating characteristic curve (ROC) analysis**

Receiver operating characteristic (ROC) curves were adopted to analyze the diagnostic value of the hub genes for PD. To check hub genes' diagnostic values, we plotted ROC curves and determined area under the curve (AUC) with “pROC” R package [37]. The hub genes with the highest AUC value were consistent as having the key power for diagnosing PD.

## **Results**

### **Identification of DEGs**

To explore the role of systems biology in the pathogenesis of PD, we analyzed NGS data of GSE135036 by DESeq2 package of R software. NGS results from GSE135036, candidate DEGs were screened using the criteria of fold change  $> 0.513$  for up regulated genes, fold change  $< -0.61$  for down regulated genes and adjusted  $P < 0.05$ . There were 957 DEGs in GSE135036. These DEGs included 478 up regulated genes and 479 down regulated genes between PD and normal control samples (Fig. 1 and Table 1). Hierarchical clustering analysis revealed a clear distinction of DEGs between patients with PD and normal control (Fig. 2).

### **GO and pathway enrichment analyses of DEGs**

In order to better understand the biological function of DEGs, we conducted GO and REACTOME pathway enrichment analysis by g:Profiler. GO results showed that up and down regulated genes significantly enriched in nervous system development, cell communication and response to stimulus of BP, cell junction, membrane, cell periphery and cytoplasm of CC, and transporter activity, protein binding, identical protein binding and molecular transducer activity of MF (Table 2). Moreover, REACTOME pathway enrichment analysis showed that the up and down regulated genes were enriched in neuronal system, transmission across chemical synapses, immune system and cytokine signaling in immune system (Table 3).

### **Construction of the PPI network and module analysis**

To investigate the molecular mechanism of PD from a systematic perspective, PPI network was built to examine the relationship between proteins. PPI network was built by HIPPIE interactome for DEGs. There were 4092 nodes and 7138 edges in the visualization network using the Cytoscape (Fig. 3). Based on the high node degree, betweenness centrality, stress centrality and closeness centrality the top hub genes, including OTUB1, PPP2R1A, AP2M1, PIN1, USP11, CDK2, IQGAP1, NEDD4, VIM and CDK1, were identified in the PPI network (Table 4). PEWCC1 was used to identify the significant cluster modules in the PPI network and the top 2 modules were selected (Fig. 4A and 4B). Following GO and REACTOME pathway screening, the module 1 (7 nodes and 15 edges) was revealed to be associated with neuronal system and nervous system development and the module 2 (20 nodes and 41 edges) was revealed to be associated with immune system, muscle contraction, signaling by NTRK1 (TRKA), response to stimulus and cell communication.

### **miRNA-hub gene regulatory network construction**

miRNA-hub gene regulatory network was built by miRNet for hub genes. The miRNA-hub gene regulatory network of hub genes was constructed with 2432 (miRNA: 2135; hub gene: 297) nodes and 14589 edges (Fig. 5). AP2M1 was targeted by 69 miRNAs (ex; hsa-mir-3911), PIN1 was targeted by 56 miRNAs (ex; hsa-mir-199b-5p), PPP2R1A was targeted by 46 miRNAs (ex; hsa-mir-6779-5p), SCN2B was targeted by 46 miRNAs (ex; hsa-mir-4722-3p), OTUB1 was targeted by 45 miRNAs (ex; hsa-mir-1908-5p), FKBP5 was targeted by 88 miRNAs (ex; hsa-mir-3654), CDK2 was targeted by 78 miRNAs (ex; hsa-mir-1296-5p), PLSCR1 was targeted by 75 miRNAs (ex; hsa-mir-1304-5p), YAP1 was targeted by 56 miRNAs (ex; hsa-mir-548d-5p) and CDK1 was targeted by 52 miRNAs (ex; hsa-mir-103a-3p) (Table 5).

### **TF-hub gene regulatory network construction**

TF-hub gene regulatory network was built by NetworkAnalyst for hub genes. The TF-hub gene regulatory network of hub genes was constructed with 372 (TF: 85; hub gene: 287) nodes and 2217 edges (Fig. 6). DLG3 was targeted by 17 TFs (ex; FOXC1), COPS7A was targeted by 15 TFs (ex; IRF2), GABARAPL1 was targeted by 15 TFs (ex; PPARG), MAP1LC3A was targeted by 14 TFs (ex; GATA2),



OTUB1 was targeted by 12 TFs (ex; ARID3A), BCL6 was targeted by 17 TFs (ex; FOXL1), FKBP5 was targeted by 17 TFs (ex; SREBF1), CDK1 was targeted by 14 TFs (ex; NFIC), CDK2 was targeted by 14 TFs (ex; POU2F2) and SYK was targeted by 13 TFs (ex; PRDM1) (Table 5).

### **Receiver operating characteristic curve (ROC) analysis**

A ROC curve was plotted to evaluate the diagnostic value of OTUB1, PPP2R1A, AP2M1, PIN1, USP11, CDK2, IQGAP1, NEDD4, VIM and CDK1 (Fig. 7). The AUCs for the 10 hub genes were 0.943, 0.934, 0.874, 0.846, 0.854, 0.931, 0.929, 0.869, 0.940 and 0.860, respectively (Fig.7). This analysis demonstrated that the 10 hub genes had a diagnostic role in PD.

### **Discussion**

PD is a neurodegenerative disease characterized by tremor and bradykinesia. However, the exact mechanisms linked with PD are not clear. It has been demonstrated that tic factors play key roles in the advancement of PD. However, owing to lack of validated genetic targets, no possible therapeutic agents have been reported for the effective and safe treatment of the disease, so our goal was to find the key DEGs, associated pathways, and models that might be used as potential novel biomarkers or therapeutic targets for PD.

In the present investigation, integrated bioinformatics analysis of NGS data (GSE135036) was used to find the potential key genes related to PD. By performing DEGs analysis, 478 up regulated and 479 down regulated genes were successfully identified. Previous studies have demonstrated that VGF (VGF nerve growth factor inducible) [38] and SST (somatostatin) [39] are linked with the development mechanisms of Huntington's disease. VGF (VGF nerve growth factor inducible) [40] and RRM2 [41] expression has significant diagnosis value in amyotrophic lateral sclerosis patients and acts as potential targets for amyotrophic lateral sclerosis targeted therapy. The recent studies have reported the identification of VGF (VGF nerve growth factor inducible) [42], CRH (corticotropin releasing hormone) [43], NPAS4 [44] and SST (somatostatin) [45] biomarkers in schizophrenia. Altered CRH (corticotropin releasing hormone) [46] and SST (somatostatin) [47] expression levels are associated with PD and are considered to be a biomarker and therapeutic target for PD. CRH (corticotropin releasing



hormone) [48] and SST (somatostatin) [49] were shown to participate in facilitating Alzheimer's disease. Kümpfel et al. [50] and Basivireddy et al. [51] found that biomarkers, including CRH (corticotropin releasing hormone) and SST (somatostatin) positively correlate with multiple sclerosis. CRH (corticotropin releasing hormone) [52] and SST (somatostatin) [53] have been reported to be altered expression in autism spectrum disorder. DUSP4 [54] have been reported to be related to epilepsy. These findings suggested that these genes might participate in the occurrence and development of PD.

In GO function and REACTOME pathway annotation, some genes involved with regulation of neurological and immune system processes were enriched in PD samples. Signaling by NTRK1 (TRKA) [55], cardiac conduction [56], signaling by GPCR [57], immune system [58], cytokine signaling in immune system [59], interferon signaling [60] and toll-like receptor cascades [61] were responsible for development of PD. Recent studies have shown that EGR2 [62], WNT1 [63], ARC (activity regulated cytoskeleton associated protein) [64], CHRNA7 [65], SEZ6L2 [66], IL1RAPL2 [67], PER2 [68], PCDH19 [69], CNTNAP2 [70], SLC12A5 [71], CDK5 [72], ACTL6B [73], GABRD (gamma-aminobutyric acid type A receptor subunit delta) [74], CACNA1G [75], HTR2C [76], STX1A [77], ATP1A3 [78], RIMS3 [79], CNTNAP2 [80], CDH8 [81], SCAMP5 [82], SYNGR1 [83], ARHGEF9 [84], DLG3 [85], RBP4 [86], IL9 [87], S100A9 [88], HGF (hepatocyte growth factor) [89], C3 [90], FKBP5 [91], GABRE (gamma-aminobutyric acid type A receptor subunit epsilon) [92], NCKAP1L [93], PIK3CG [94], ITGB3 [95], ANXA1 [96], SYNE2 [97] and DBI (diazepam binding inhibitor, acyl-CoA binding protein) [98] were closely involved with the occurrence, development, and prognosis of autism spectrum disorder. EGR2 [99], ADCYAP1 [100], CHRNA7 [101], NRN1 [102], ETV5 [103], STXBP1 [104], CAMKK2 [105], VAMP2 [106], SYNGR1 [107], NOD2 [108], TLR2 [109], BRCA2 [110] and LEF1 [111] were previously reported to be critical for the development of bipolar disorder. Accumulating evidence shows that EGR2 [112], WNT1 [113], ARC (activity regulated cytoskeleton associated protein) [114], ADCYAP1 [115], SCN5A [116], RTN4R [117], CHRNA7 [118], NRG1 (neurogranin) [119], CHRM1 [120], CCK (cholecystokinin) [121], RGS4 [122], LINGO1 [123], PAK1 [124], PCDH19 [125], NRN1 [126], CX3CL1 [127], CNTNAP2 [128], SLC12A5 [129], GAS7 [130], NTNG1 [131], RAB3A [132], STXBP1 [104], CHRNB2 [133], CDK5

[134], HTR5A [135], SLC30A3 [136], HTR3B [137], HTR2C [138], TAMALIN (trafficking regulator and scaffold protein tamalin) [139], STX1A [140], GRM2 [141], SLC1A6 [142], NPTX2 [143], CAMKK2 [144], SYP (synaptophysin) [145], VAMP2 [146], ATP1A3 [147], SV2A [148], CNTNAP2 [149], CAP2 [150], SYNGR1 [151], SNCB (synuclein beta) [152], RBP4 [153], KIF17 [154], CHI3L1 [155], CCR5 [156], C1QB [157], TLR7 [158], TLR2 [159], MNDA (myeloid cell nuclear differentiation antigen) [160], C3 [161], IL2RG [162], MICB (MHC class I polypeptide-related sequence B) [163], FKBP5 [164], NEFH (neurofilament heavy chain) [165], CELSR1 [166], APBB1IP [167], CD34 [168], BRCA2 [110], ITGB3 [169], ANXA3 [170], NQO1 [171], B2M [172], SLC39A12 [173], NEDD4 [174], COX2 [175], CFH (complement factor H) [176], TGFBR2 [177], MYD88 [178], ITGA8 [179], REST (RE1 silencing transcription factor) [180] and KCNJ10 [181] are altered expressed in schizophrenia. WNT1 [182], NRG1 (neurogranin) [183], CCK (cholecystokinin) [184], RGS4 [185], PLK2 [186], LINGO1 [187], UNC5D [188], MEF2D [189], CX3CL1 [190], PIN1 [191], RET (ret proto-oncogene) [192], NME1 [193], STX1B [194], CDK5 [195], NPTX2 [196], VAMP2 [197], PRKAR1B [198], CAP2 [150], SNCB (synuclein beta) [199], AP2M1 [200], S100A9 [201], TLR8 [202], SERPINA1 [203], CCR5 [204], NOD2 [205], TLR7 [202], HGF (hepatocyte growth factor) [206], TLR2 [207], PTPRC (protein tyrosine phosphatase receptor type C) [208], C3 [209], LAMP3 [210], GLI1 [211], GPR4 [212], TLR1 [213], OSMR (oncostatin M receptor) [214], NFATC2 [215], GPNMB (glycoprotein nmb) [216], NQO1 [217], B2M [218], TRDN (triadin) [219], HK2 [220], NEDD4 [221], ATP6 [222], COX2 [223], CASP6 [224], MYD88 [225], NFKBIA (NFKB inhibitor alpha) [226], IL13RA1 [227], ND1 [228], TP53INP1 [229], CSF1 [230], ITPKB (inositol-trisphosphate 3-kinase B) [231], ANXA1 [232], SUMO4 [233], ITGA8 [234] and REST (RE1 silencing transcription factor) [235] have been shown to be activated in PD. WNT1 [236], RTN4R [237], MEF2D [238], CX3CL1 [239], PIN1 [240], UNC13A [241], CDK5 [242], SLC30A3 [243], TUBA4A [244], BCL2A1 [245], CHI3L1 [246], SERPINA1 [247], CCR5 [248], C7 [249], S100A4 [250], C1QB [251], SPP1 [252], TLR7 [253], TLR2 [254], NEFH (neurofilament heavy chain) [255], GPNMB (glycoprotein nmb) [256], B2M [257], COX2 [258], YAP1 [259], MYD88 [260], CSF1 [261], REST (RE1 silencing transcription factor) [262], DDX58 [263], LRP4 [264] and KCNJ10 [265] contributes to the progression of amyotrophic lateral sclerosis. Previous studies had shown that the altered

expression of ADCYAP1 [266], CCK (cholecystokinin) [267], LINGO1 [268], CX3CL1 [269], NECTIN1 [270], IL9 [271], TLR8 [272], CCR5 [273], NOD2 [274], C7 [275], TLR7 [276], HGF (hepatocyte growth factor) [277], TLR2 [278], PTPRC (protein tyrosine phosphatase receptor type C) [279], C3 [280], IFI16 [281], GLI1 [282], CYBB (cytochrome b-245 beta chain) [283], TLR1 [284], NEFH (neurofilament heavy chain) [285], CLIC1 [286], PDK4 [287], NFATC2 [288], GPNMB (glycoprotein nmb) [289], CD58 [290], NQO1 [291], B2M [292], ANXA2 [293], FLT1 [294], IFIH1 [295], COX2 [296], NLRC5 [297], CFH (complement factor H) [298], YAP1 [299], MYD88 [300], IQGAP1 [301], ANXA1 [302] and DDX58 [303] were closely related to the occurrence of multiple sclerosis. Studies had shown that NEUROD6 [304], CHRNA7 [305], NRG1 (neurogranin) [306], CCK (cholecystokinin) [307], RGS4 [308], SEZ6 [309], PLK2 [310], LINGO1 [311], NRN1 [312], CX3CL1 [313], CNTNAP2 [314], CALM3 [315], PIN1 [316], RAB3A [317], CHRNB2 [318], CDK5 [319], RPH3A [320], NPTX2 [321], NPTXR (neuronal pentraxin receptor) [322], SEZ6 [323], CAMKK2 [324], SYP (synaptophysin) [325], SV2A [326], PRKAR1B [198], CDH13 [327], CNTNAP2 [328], CALM3 [329], CAP2 [150], SLC10A4 [330], RBP4 [331], HPX (hemopexin) [332], CALHM1 [333], GNG13 [334], CHI3L1 [335], STC1 [336], FPR2 [337], S100A9 [338], CCR5 [339], C7 [340], CDK1 [341], HGF (hepatocyte growth factor) [342], TLR5 [343], TFPI (tissue factor pathway inhibitor) [344], TLR2 [345], C3 [346], CFI (complement factor I) [347], ALOX5AP [348], SELL (selectin L) [349], FKBP5 [350], CASP4 [351], SYK (spleen associated tyrosine kinase) [352], CGAS (cyclic GMP-AMP synthase) [353], NCKAP1L [354], CLIC1 [286], NFATC2 [355], CD34 [356], GPNMB (glycoprotein nmb) [357], CDK2 [358], TNFSF10 [359], BTK (Bruton tyrosine kinase) [360], NQO1 [361], CTSS (cathepsin S) [362], MSTN (myostatin) [363], IFITM3 [364], DOCK2 [365], BCL6 [366], COX2 [367], CASP7 [368], CFH (complement factor H) [369], YAP1 [370], TGFBR2 [371], CASP6 [372], MYD88 [373], CYTB (cytochrome b) [374], RGCC (regulator of cell cycle) [375], CSF1 [376], ITPKB (inositol-trisphosphate 3-kinase B) [377], CD2AP [378], REST (RE1 silencing transcription factor) [379] and BACE2 [380] were altered expressed in patients with Alzheimer's disease. Byrne et al. [381], Lee et al. [382], Hays et al. [383], Rudinskiy et al. [384], Subbarayan et al. [385], Carnemolla et al. [386], Cherubini et al. [387], Wang et al. [388], Goto et al. [389], Bertoglio et al.

[390], Griffioen et al. [391], Larkin and Muchowski [392], Bailus et al. [393], Sharma et al. [394], Bondulich et al. [395], Wong et al. [396], Orozco-Díaz et al. [397] and Picó et al. [398] revealed that NRG1 (neurogranin), CHRM1, CCK (cholecystokinin), HPCA (hippocalcin), CX3CL1, PIN1, CDK5, GRM2, SYP (synaptophysin), SV2A, TLR2, C3, FKBP5, CGAS (cyclic GMP-AMP synthase), MSTN (myostatin), CASP6, REST (RE1 silencing transcription factor) and SLC19A3 are associated with Huntington's disease. The expression and prognosis of TUBB2A [399], PAK1 [400], PRKCG (protein kinase C gamma) [401], CACNA1G [402], ATP1A3 [403] and KCNJ10 [404] have been investigated in ataxia. SCN3B [405], PCDH19 [406], CNTNAP2 [407], STXBP1 [408], CHRN2 [409], NAPA (NSF attachment protein alpha) [410], STX1B [411], GABRG2 [412], CAMKK2 [144], CNTNAP2 [413], ARHGEF9 [414], COX8A [415], CALHM1 [416], SLC45A1 [417], TLR5 [418] and KCNJ10 [419] could be a useful prognostic biomarker in epilepsy. The altered expression of NPTX2 [420], VAMP2 [421], PRKAR1B [422], SNCB (synuclein beta) [199], AP2M1 [423], TUBA4A [424], KIF17 [425] and SYK (spleen associated tyrosine kinase) [426] might be related to the progression of dementia. The above evidence revealed that these genes were related with disorders of the nervous system and might have a function in PD.

The PPI network and modules of DEGs was analyzed by HIPPIE interactome. After screening hub genes, these key genes related to PD prognosis, diagnosis and novel therapy were identified. Reports describe the role of OTUB1 in PD [427]. Miron et al. [428] demonstrates that PPP2R1A is up-regulated in Alzheimer's disease. However, the role of USP11, VIM, WWTR1, RASSF8 and TEAD2 in the development of PD remains unclear. Further investigations will be required to identify the relationship between these genes and PD.

miRNA-hub gene regulatory network and TF-hub gene regulatory network containing the hub genes were constructed. After screening miRNA and TFs, these key miRNA and TFs related to PD prognosis, diagnosis and novel therapies were identified. A previous study demonstrated that hsa-mir-103a-3p [429] was altered expressed in multiple sclerosis. Wu et al [430] reported that hsa-mir-103a-3p expression might be regarded as an indicator of susceptibility to autism spectrum disorder. Kurzawski et al [431] and Lou et al [432] demonstrated that the altered

expression of GATA2 and SREBF1 are associated with prognosis in patients with PD. Study have reported that patients with SREBF1 [433] expression tended to suffer from amyotrophic lateral sclerosis. SREBF1 [434] was elevated in patients with schizophrenia. These results indicated that SCN2B, PLSCR1, COPS7A, GABARAPL1, hsa-mir-3911, hsa-mir-199b-5p, hsa-mir-6779-5p, hsa-mir-4722-3p, hsa-mir-1908-5p, hsa-mir-3654, hsa-mir-1296-5p, hsa-mir-1304-5p, hsa-mir-548d-5p, FOXC1, IRF2, PPARG, ARID3A, FOXL1, NFIC (nuclear factor 1 C), POU2F2 and PRDM1 might be a potential biomarker of PD.

In conclusion, we used a series of bioinformatics analysis methods to identify the essential genes and pathways involved in PD initiation and progression from NGS containing normal control samples and PD samples. Our results provide a more detailed molecular mechanism for the advancement of PD, shedding light on the potential biomarkers and therapeutic targets. However, the interacting mechanism and function of genes need to be confirmed in further experiments.

### **Acknowledgement**

I thank Peipei Li, Labrie lab, Center for Neurodegenerative Science, Van Andel Research Institute, Grand Rapids, USA, very much, the author who deposited their NGS dataset GSE135036, into the public GEO database.

### **Conflict of interest**

The authors declare that they have no conflict of interest.

### **Ethical approval**

This article does not contain any studies with human participants or animals performed by any of the authors.

### **Informed consent**

No informed consent because this study does not contain human or animals participants.

### **Availability of data and materials**



The datasets supporting the conclusions of this article are available in the GEO (Gene Expression Omnibus) (<https://www.ncbi.nlm.nih.gov/geo/>) repository. [(GSE135036) <https://www.ncbi.nlm.nih.gov/geo/query/acc.cgi?acc=GSE135036>]

### **Consent for publication**

Not applicable.

### **Competing interests**

The authors declare that they have no competing interests.

### **Author Contributions**

B. V. - Writing original draft, and review and editing

C. V. - Software and investigation

### **References**

1. Lotankar S, Prabhavalkar KS, Bhatt LK. Biomarkers for Parkinson's Disease: Recent Advancement. *Neurosci Bull.* 2017;33(5):585-597. doi:[10.1007/s12264-017-0183-5](https://doi.org/10.1007/s12264-017-0183-5)
2. Tysnes OB, Storstein A. Epidemiology of Parkinson's disease. *J Neural Transm (Vienna).* 2017;124(8):901-905. doi:[10.1007/s00702-017-1686-y](https://doi.org/10.1007/s00702-017-1686-y)
3. Beitz JM. Parkinson's disease: a review. *Front Biosci (Schol Ed).* 2014;6:65-74. doi:[10.2741/s415](https://doi.org/10.2741/s415)
4. Billingsley KJ, Bandres-Ciga S, Saez-Atienzar S, Singleton AB. Genetic risk factors in Parkinson's disease. *Cell Tissue Res.* 2018;373(1):9-20. doi:[10.1007/s00441-018-2817-y](https://doi.org/10.1007/s00441-018-2817-y)
5. Jin H, Gu HY, Mao CJ, Chen J, Liu CF. Association of inflammatory factors and aging in Parkinson's disease. *Neurosci Lett.* 2020;736:135259. doi:[10.1016/j.neulet.2020.135259](https://doi.org/10.1016/j.neulet.2020.135259)
6. Yuan X, Tian Y, Liu C, Zhang Z. Environmental factors in Parkinson's disease: New insights into the molecular mechanisms. *Toxicol Lett.* 2022;356:1-10. doi:[10.1016/j.toxlet.2021.12.003](https://doi.org/10.1016/j.toxlet.2021.12.003)
7. Palasz E, Wysocka A, Gasiiorowska A, Chalimoniuk M, Niewiadomski W, Niewiadomska G. BDNF as a Promising Therapeutic Agent in Parkinson's Disease. *Int J Mol Sci.* 2020;21(3):1170. doi:[10.3390/ijms21031170](https://doi.org/10.3390/ijms21031170)

8. Lang C, Campbell KR, Ryan BJ, Carling P, Attar M, Vowles J, Perestenko OV, Bowden R, Baig F, Kasten M, et al. Single-Cell Sequencing of iPSC-Dopamine Neurons Reconstructs Disease Progression and Identifies HDAC4 as a Regulator of Parkinson Cell Phenotypes. *Cell Stem Cell*. 2019;24(1):93-106.e6. doi:[10.1016/j.stem.2018.10.023](https://doi.org/10.1016/j.stem.2018.10.023)
9. Sassone J, Reale C, Dati G, Regoni M, Pellecchia MT, Garavaglia B. The Role of VPS35 in the Pathobiology of Parkinson's Disease. *Cell Mol Neurobiol*. 2021;41(2):199-227. doi:[10.1007/s10571-020-00849-8](https://doi.org/10.1007/s10571-020-00849-8)
10. Hur EM, Lee BD. LRRK2 at the Crossroad of Aging and Parkinson's Disease. *Genes (Basel)*. 2021;12(4):505. doi:[10.3390/genes12040505](https://doi.org/10.3390/genes12040505)
11. Periñán MT, Macías-García D, Labrador-Espinosa MÁ, Jesús S, Buiza-Rueda D, Adarmes-Gómez AD, Muñoz-Delgado L, Gómez-Garre P, Mir P. Association of PICALM with Cognitive Impairment in Parkinson's Disease. *Mov Disord*. 2021;36(1):118-123. doi:[10.1002/mds.28283](https://doi.org/10.1002/mds.28283)
12. Iyer M, Subramaniam MD, Venkatesan D, Cho SG, Ryding M, Meyer M, Vellingiri B. Role of RhoA-ROCK signaling in Parkinson's disease. *Eur J Pharmacol*. 2021;894:173815. doi:[10.1016/j.ejphar.2020.173815](https://doi.org/10.1016/j.ejphar.2020.173815)
13. Ammal Kaidery N, Ahuja M, Thomas B. Crosstalk between Nrf2 signaling and mitochondrial function in Parkinson's disease. *Mol Cell Neurosci*. 2019;101:103413. doi:[10.1016/j.mcn.2019.103413](https://doi.org/10.1016/j.mcn.2019.103413)
14. Obergasteiger J, Frapporti G, Pramstaller PP, Hicks AA, Volta M. A new hypothesis for Parkinson's disease pathogenesis: GTPase-p38 MAPK signaling and autophagy as convergence points of etiology and genomics. *Mol Neurodegener*. 2018;13(1):40. doi:[10.1186/s13024-018-0273-5](https://doi.org/10.1186/s13024-018-0273-5)
15. Lashgari NA, Roudsari NM, Momtaz S, Sathyapalan T, Abdolghaffari AH, Sahebkar A. The involvement of JAK/STAT signaling pathway in the treatment of Parkinson's disease. *J Neuroimmunol*. 2021;361:577758. doi:[10.1016/j.jneuroim.2021.577758](https://doi.org/10.1016/j.jneuroim.2021.577758)
16. Ji Y, Wang D, Zhang B, Lu H. Bergenin Ameliorates MPTP-Induced Parkinson's Disease by Activating PI3K/Akt Signaling Pathway. *J Alzheimers Dis*. 2019;72(3):823-833. doi:[10.3233/JAD-190870](https://doi.org/10.3233/JAD-190870)
17. Pant S, Weiner R, Marton MJ. Navigating the rapids: the development of regulated next-generation sequencing-based clinical trial assays and companion diagnostics. *Front Oncol*. 2014;4:78. doi:[10.3389/fonc.2014.00078](https://doi.org/10.3389/fonc.2014.00078)



18. Woollard PM, Mehta NA, Vamathevan JJ, Van Horn S, Bonde BK, Dow DJ. The application of next-generation sequencing technologies to drug discovery and development. *Drug Discov Today*. 2011;16(11-12):512-519. doi:[10.1016/j.drudis.2011.03.006](https://doi.org/10.1016/j.drudis.2011.03.006)
19. Coenen-Stass AML, Magen I, Brooks T, Ben-Dov IZ, Greensmith L, Hornstein E, Fratta P. Evaluation of methodologies for microRNA biomarker detection by next generation sequencing. *RNA Biol*. 2018;15(8):1133-1145. doi:[10.1080/15476286.2018.1514236](https://doi.org/10.1080/15476286.2018.1514236)
20. Gorostidi A, Martí-Massó JF, Bergareche A, Rodríguez-Oroz MC, López de Munain A, Ruiz-Martínez J. Genetic Mutation Analysis of Parkinson's Disease Patients Using Multigene Next-Generation Sequencing Panels. *Mol Diagn Ther*. 2016;20(5):481-491. doi:[10.1007/s40291-016-0216-1](https://doi.org/10.1007/s40291-016-0216-1)
21. Li P, Ensink E, Lang S, Marshall L, Schilthuis M, Lamp J, Vega I, Labrie V. Hemispheric asymmetry in the human brain and in Parkinson's disease is linked to divergent epigenetic patterns in neurons. *Genome Biol*. 2020;21(1):61. doi:[10.1186/s13059-020-01960-1](https://doi.org/10.1186/s13059-020-01960-1)
22. Clough E, Barrett T. The Gene Expression Omnibus Database. *Methods Mol Biol*. 2016;1418:93-110. doi:[10.1007/978-1-4939-3578-9\\_5](https://doi.org/10.1007/978-1-4939-3578-9_5)
23. Love MI, Huber W, Anders S. Moderated estimation of fold change and dispersion for RNA-seq data with DESeq2. *Genome Biol*. 2014;15(12):550. doi:[10.1186/s13059-014-0550-8](https://doi.org/10.1186/s13059-014-0550-8)
24. Thomas PD. The Gene Ontology and the Meaning of Biological Function. *Methods Mol Biol*. 2017;1446:15–24. doi:[10.1007/978-1-4939-3743-1\\_2](https://doi.org/10.1007/978-1-4939-3743-1_2)
25. Fabregat A, Jupe S, Matthews L, Sidiropoulos K, Gillespie M, Garapati P, Haw R, Jassal B, Korninger F, May B et al The Reactome Pathway Knowledgebase. *Nucleic Acids Res*. 2018;46(D1):D649–D655. doi:[10.1093/nar/gkx1132](https://doi.org/10.1093/nar/gkx1132)
26. Reimand J, Kull M, Peterson H, Hansen J, Vilo J. g:Profiler--a web-based toolset for functional profiling of gene lists from large-scale experiments. *Nucleic Acids Res*. 2007;35(Web Server issue):W193-W200. doi:[10.1093/nar/gkm226](https://doi.org/10.1093/nar/gkm226)
27. Alanis-Lobato G, Andrade-Navarro MA, Schaefer MH. HIPPIE v2.0: enhancing meaningfulness and reliability of protein-protein interaction networks. *Nucleic Acids Res*. 2017;45(D1):D408-D414. doi:[10.1093/nar/gkw985](https://doi.org/10.1093/nar/gkw985)

28. Shannon P, Markiel A, Ozier O, Baliga NS, Wang JT, Ramage D, Amin N, Schwikowski B, Ideker T. Cytoscape: a software environment for integrated models of biomolecular interaction networks. *Genome Res* 2003;13(11):2498-2504. doi:[10.1101/gr.1239303](https://doi.org/10.1101/gr.1239303)
29. Luo X, Guo L, Dai XJ, Wang Q, Zhu W, Miao X, Gong H. Abnormal intrinsic functional hubs in alcohol dependence: evidence from a voxelwise degree centrality analysis. *Neuropsychiatr Dis Treat*. 2017;13:2011-2020. doi:[10.2147/NDT.S142742](https://doi.org/10.2147/NDT.S142742)
30. Li Y, Li W, Tan Y, Liu F, Cao Y, Lee KY. Hierarchical Decomposition for Betweenness Centrality Measure of Complex Networks. *Sci Rep*. 2017;7:46491.. doi:[10.1038/srep46491](https://doi.org/10.1038/srep46491)
31. Gilbert M, Li Z, Wu XN, Rohr L, Gombos S, Harter K, Schulze WX. Comparison of path-based centrality measures in protein-protein interaction networks revealed proteins with phenotypic relevance during adaptation to changing nitrogen environments. *J Proteomics*. 2021;235:104114. doi:[10.1016/j.jprot.2021.104114](https://doi.org/10.1016/j.jprot.2021.104114)
32. Li G, Li M, Wang J, Li Y, Pan Y. United Neighborhood Closeness Centrality and Orthology for Predicting Essential Proteins. *IEEE/ACM Trans Comput Biol Bioinform*. 2020;17(4):1451-1458. doi:[10.1109/TCBB.2018.2889978](https://doi.org/10.1109/TCBB.2018.2889978)
33. Assenov Y, Ramírez F, Schelhorn SE, Lengauer T, Albrecht M. Computing topological parameters of biological networks. *Bioinformatics*. 2008;24(2):282-284. doi:[10.1093/bioinformatics/btm554](https://doi.org/10.1093/bioinformatics/btm554)
34. Zaki N, Efimov D, Berenguères J. Protein complex detection using interaction reliability assessment and weighted clustering coefficient. *BMC Bioinformatics*. 2013;14:163. doi:[10.1186/1471-2105-14](https://doi.org/10.1186/1471-2105-14)
35. Fan Y, Xia J (2018) miRNet-Functional Analysis and Visual Exploration of miRNA-Target Interactions in a Network Context. *Methods Mol Biol* 1819:215-233. doi:[10.1007/978-1-4939-8618-7\\_10](https://doi.org/10.1007/978-1-4939-8618-7_10)
36. Zhou G, Soufan O, Ewald J, Hancock REW, Basu N, Xia J (2019) NetworkAnalyst 3.0: a visual analytics platform for comprehensive gene expression profiling and meta-analysis. *Nucleic Acids Res* 47:W234-W241. doi:[10.1093/nar/gkz240](https://doi.org/10.1093/nar/gkz240)

37. Robin X, Turck N, Hainard A, Tiberti N, Lisacek F, Sanchez JC, Müller M. pROC: an open-source package for R and S+ to analyze and compare ROC curves. *BMC Bioinformatics* 2011;12:77. doi:[10.1186/1471-2105-12-77](https://doi.org/10.1186/1471-2105-12-77)
38. Noda Y, Shimazawa M, Tanaka H, Tamura S, Inoue T, Tsuruma K, Hara H. VGF and striatal cell damage in in vitro and in vivo models of Huntington's disease. *Pharmacol Res Perspect*. 2015;3(3):e00140. doi:[10.1002/prp2.140](https://doi.org/10.1002/prp2.140)
39. Norris PJ, Waldvogel HJ, Faull RL, Love DR, Emson PC. Decreased neuronal nitric oxide synthase messenger RNA and somatostatin messenger RNA in the striatum of Huntington's disease. *Neuroscience*. 1996;72(4):1037-1047. doi:[10.1016/0306-4522\(95\)00596-x](https://doi.org/10.1016/0306-4522(95)00596-x)
40. Noda Y, Tanaka M, Nakamura S, Ito J, Kakita A, Hara H, Shimazawa M. Identification of VGF nerve growth factor inducible-producing cells in human spinal cords and expression change in patients with amyotrophic lateral sclerosis. *Int J Med Sci*. 2020;17(4):480-489. doi:[10.7150/ijms.39101](https://doi.org/10.7150/ijms.39101)
41. Prakash A, Kumar V, Banerjee A, Lynn AM, Prasad R. Structural heterogeneity in RNA recognition motif 2 (RRM2) of TAR DNA-binding protein 43 (TDP-43): clue to amyotrophic lateral sclerosis. *J Biomol Struct Dyn*. 2021;39(1):357-367. doi:[10.1080/07391102.2020.1714481](https://doi.org/10.1080/07391102.2020.1714481)
42. Busse S, Bernstein HG, Busse M, Biela H, Brisch R, Mawrin C, Müller S, Sarnyai Z, Gos T, Bogerts B, et al. Reduced density of hypothalamic VGF-immunoreactive neurons in schizophrenia: a potential link to impaired growth factor signaling and energy homeostasis. *Eur Arch Psychiatry Clin Neurosci*. 2012;262(5):365-374. doi:[10.1007/s00406-011-0282-7](https://doi.org/10.1007/s00406-011-0282-7)
43. Bennett A O MR. Stress and anxiety in schizophrenia and depression: glucocorticoids, corticotropin-releasing hormone and synapse regression. *Aust N Z J Psychiatry*. 2008;42(12):995-1002. doi:[10.1080/00048670802512073](https://doi.org/10.1080/00048670802512073)
44. Shepard R, Heslin K, Hagerdorn P, Coutellier L. Downregulation of Npas4 in parvalbumin interneurons and cognitive deficits after neonatal NMDA receptor blockade: relevance for schizophrenia. *Transl Psychiatry*. 2019;9(1):99. doi:[10.1038/s41398-019-0436-3](https://doi.org/10.1038/s41398-019-0436-3)
45. Van Derveer AB, Bastos G, Ferrell AD, Gallimore CG, Greene ML, Holmes JT, Kubricka V, Ross JM, Hamm JP. A Role for Somatostatin-Positive Interneurons in Neuro-Oscillatory and Information Processing Deficits in

- Schizophrenia. *Schizophr Bull.* 2021;47(5):1385-1398. doi:[10.1093/schbul/sbaa184](https://doi.org/10.1093/schbul/sbaa184)
46. Hoogendijk WJ, Purba JS, Hofman MA, de Vos RA, Jansen EN, Swaab DF. Depression in Parkinson's disease is not accompanied by more corticotropin-releasing hormone expressing neurons in the hypothalamic paraventricular nucleus. *Biol Psychiatry.* 1998;43(12):913-917. doi:[10.1016/s0006-3223\(97\)00338-7](https://doi.org/10.1016/s0006-3223(97)00338-7)
47. Shiraishi M, Kobayashi T, Watanabe H, Kamo T, Hasegawa Y. Serum somatostatin in early-stage Parkinson's disease. *Acta Neurol Scand.* 2010;121(4):225-229. doi:[10.1111/j.1600-0404.2009.01178.x](https://doi.org/10.1111/j.1600-0404.2009.01178.x)
48. Pedersen WA, McCullers D, Culmsee C, Haughey NJ, Herman JP, Mattson MP. Corticotropin-releasing hormone protects neurons against insults relevant to the pathogenesis of Alzheimer's disease. *Neurobiol Dis.* 2001;8(3):492-503. doi:[10.1006/nbdi.2001.0395](https://doi.org/10.1006/nbdi.2001.0395)
49. Solarski M, Wang H, Wille H, Schmitt-Ulms G. Somatostatin in Alzheimer's disease: A new Role for an Old Player. *Prion.* 2018;12(1):1-8. doi:[10.1080/19336896.2017.1405207](https://doi.org/10.1080/19336896.2017.1405207)
50. Kümpfel T, Then Bergh F, Friess E, Uhr M, Yassouridis A, Trenkwalder C, Holsboer F. Dehydroepiandrosterone response to the adrenocorticotropin test and the combined dexamethasone and corticotropin-releasing hormone test in patients with multiple sclerosis. *Neuroendocrinology.* 1999;70(6):431-438. doi:[10.1159/000054505](https://doi.org/10.1159/000054505)
51. Basivireddy J, Somvanshi RK, Romero IA, Weksler BB, Couraud PO, Oger J, Kumar U. Somatostatin preserved blood brain barrier against cytokine induced alterations: possible role in multiple sclerosis. *Biochem Pharmacol.* 2013;86(4):497-507. doi:[10.1016/j.bcp.2013.06.001](https://doi.org/10.1016/j.bcp.2013.06.001)
52. Tsilioni I, Dodman N, Petra AI, Taliou A, Francis K, Moon-Fanelli A, Shuster L, Theoharides TC. Elevated serum neurotensin and CRH levels in children with autistic spectrum disorders and tail-chasing Bull Terriers with a phenotype similar to autism. *Transl Psychiatry.* 2014;4(10):e466. doi:[10.1038/tp.2014.106](https://doi.org/10.1038/tp.2014.106)
53. Shin S, Santi A, Huang S. Conditional Pten knockout in parvalbumin- or somatostatin-positive neurons sufficiently leads to autism-related behavioral phenotypes. *Mol Brain.* 2021;14(1):24. doi:[10.1186/s13041-021-00731-8](https://doi.org/10.1186/s13041-021-00731-8)

54. Kirchner A, Bagla S, Dachet F, Loeb JA. DUSP4 appears to be a highly localized endogenous inhibitor of epileptic signaling in human neocortex. *Neurobiol Dis.* 2020;145:105073. doi:[10.1016/j.nbd.2020.105073](https://doi.org/10.1016/j.nbd.2020.105073)
55. Liu K, Zhang W, Li Y, Ding Q, Bai Y, Wang F, Xu G. Human peripheral blood-derived mesenchymal stem cells with NTRK1 over-expression enhance repairing capability in a rat model of Parkinson's disease. *Cytotechnology.* 2018;70(5):1291-1299. doi:[10.1007/s10616-017-0175-3](https://doi.org/10.1007/s10616-017-0175-3)
56. Malek NM, Grosset KA, Stewart D, Macphee GJ, Grosset DG. Prescription of drugs with potential adverse effects on cardiac conduction in Parkinson's disease. *Parkinsonism Relat Disord.* 2013;19(6):586-589. doi:[10.1016/j.parkreldis.2013.02.004](https://doi.org/10.1016/j.parkreldis.2013.02.004)
57. Guixa-Gonzalez R, Bruno A, Marti-Solano M, Selent J. Crosstalk within GPCR heteromers in schizophrenia and Parkinson's disease: physical or just functional?. *Curr Med Chem.* 2012;19(8):1119-1134. doi:[10.2174/092986712799320574](https://doi.org/10.2174/092986712799320574)
58. Fleming SM, Davis A, Simons E. Targeting alpha-synuclein via the immune system in Parkinson's disease: Current vaccine therapies. *Neuropharmacology.* 2022;202:108870. doi:[10.1016/j.neuropharm.2021.108870](https://doi.org/10.1016/j.neuropharm.2021.108870)
59. Zhuang X, Chen Y, Zhuang X, Chen T, Xing T, Wang W, Yang X. Contribution of Pro-inflammatory Cytokine Signaling within Midbrain Periaqueductal Gray to Pain Sensitivity in Parkinson's Disease via GABAergic Pathway. *Front Neurol.* 2016;7:104. doi:[10.3389/fneur.2016.00104](https://doi.org/10.3389/fneur.2016.00104)
60. Ejlerskov P, Hultberg JG, Wang J, Carlsson R, Ambjørn M, Kuss M, Liu Y, Porcu G, Kolkova K, Friis Rundsten C, et al. Lack of Neuronal IFN- $\beta$ -IFNAR Causes Lewy Body- and Parkinson's Disease-like Dementia. *Cell.* 2015;163(2):324-339. doi:[10.1016/j.cell.2015.08.069](https://doi.org/10.1016/j.cell.2015.08.069)
61. Caputi V, Giron MC. Microbiome-Gut-Brain Axis and Toll-Like Receptors in Parkinson's Disease. *Int J Mol Sci.* 2018;19(6):1689. doi:[10.3390/ijms19061689](https://doi.org/10.3390/ijms19061689)
62. Swanberg SE, Nagarajan RP, Peddada S, Yasui DH, LaSalle JM. Reciprocal co-regulation of EGR2 and MECP2 is disrupted in Rett syndrome and autism. *Hum Mol Genet.* 2009;18(3):525-534. doi:[10.1093/hmg/ddn380](https://doi.org/10.1093/hmg/ddn380)

63. Martin PM, Yang X, Robin N, Lam E, Rabinowitz JS, Erdman CA, Quinn J, Weiss LA, Hamilton SP, et al. A rare WNT1 missense variant overrepresented in ASD leads to increased Wnt signal pathway activation. *Transl Psychiatry*. 2013;3(9):e301. doi:[10.1038/tp.2013.75](https://doi.org/10.1038/tp.2013.75)
64. Alhowikan AM. Activity-Regulated Cytoskeleton-Associated Protein Dysfunction May Contribute to Memory Disorder and Earlier Detection of Autism Spectrum Disorders. *Med Princ Pract*. 2016;25(4):350-354. doi:[10.1159/000445351](https://doi.org/10.1159/000445351)
65. Bacchelli E, Battaglia A, Cameli C, Lomartire S, Tancredi R, Thomson S, Sutcliffe JS, Maestrini E. Analysis of CHRNA7 rare variants in autism spectrum disorder susceptibility. *Am J Med Genet A*. 2015;167A(4):715-723. doi:[10.1002/ajmg.a.36847](https://doi.org/10.1002/ajmg.a.36847)
66. Konyukh M, Delorme R, Chaste P, Leblond C, Lemière N, Nygren G, Anckarsäter H, Rastam M, Ståhlberg O, Amsellem F, et al. Variations of the candidate SEZ6L2 gene on Chromosome 16p11.2 in patients with autism spectrum disorders and in human populations. *PLoS One*. 2011;6(3):e17289. doi:[10.1371/journal.pone.0017289](https://doi.org/10.1371/journal.pone.0017289)
67. Kantojärvi K, Kotala I, Rehnström K, Ylisaukko-Oja T, Vanhala R, von Wendt TN, von Wendt L, Järvelä I. Fine mapping of Xq11.1-q21.33 and mutation screening of RPS6KA6, ZNF711, ACSL4, DLG3, and IL1RAPL2 for autism spectrum disorders (ASD). *Autism Res*. 2011;4(3):228-233. doi:[10.1002/aur.187](https://doi.org/10.1002/aur.187)
68. Hoang N, Yuen RKC, Howe J, Drmic I, Ambrozewicz P, Russell C, Vorstman J, Weiss SK, Anagnostou E, Malow BA, et al. Sleep phenotype of individuals with autism spectrum disorder bearing mutations in the PER2 circadian rhythm gene. *Am J Med Genet A*. 2021;185(4):1120-1130. doi:[10.1002/ajmg.a.62086](https://doi.org/10.1002/ajmg.a.62086)
69. Breuillard D, Leunen D, Chemaly N, Auclair L, Pinaud JM, Kaminska A, Desguerre I, Ouss L, Nabbout R. Autism spectrum disorder phenotype and intellectual disability in females with epilepsy and PCDH-19 mutations. *Epilepsy Behav*. 2016;60:75-80. doi:[10.1016/j.yebeh.2016.04.009](https://doi.org/10.1016/j.yebeh.2016.04.009)
70. de Jong JO, Llapashtica C, Genestine M, Strauss K, Provenzano F, Sun Y, Zhu H, Cortese GP, Brundu F, Brigatti KW, et al. Cortical overgrowth in a preclinical forebrain organoid model of CNTNAP2-associated autism



- spectrum disorder. *Nat Commun.* 2021;12(1):4087. doi:[10.1038/s41467-021-24358-4](https://doi.org/10.1038/s41467-021-24358-4)
71. Merner ND, Chandler MR, Bourassa C, Liang B, Khanna AR, Dion P, Rouleau GA, Kahle KT. Regulatory domain or CpG site variation in SLC12A5, encoding the chloride transporter KCC2, in human autism and schizophrenia. *Front Cell Neurosci.* 2015;9:386. doi:[10.3389/fncel.2015.00386](https://doi.org/10.3389/fncel.2015.00386)
72. Wang L, Li J, Jia M, Yue W, Ruan Y, Lu T, Zhang J, Liu J, Zhang D. No association of polymorphisms in the CDK5, NDEL1, and LIS1 with autism in Chinese Han population. *Psychiatry Res.* 2011;190(2-3):369-371. doi:[10.1016/j.psychres.2011.08.004](https://doi.org/10.1016/j.psychres.2011.08.004)
73. Wenderski W, Wang L, Krokhotin A, Walsh JJ, Li H, Shoji H, Ghosh S, George RD, Miller EL, Elias L, et al. Loss of the neural-specific BAF subunit ACTL6B relieves repression of early response genes and causes recessive autism. *Proc Natl Acad Sci U S A.* 2020;117(18):10055-10066. doi:[10.1073/pnas.1908238117](https://doi.org/10.1073/pnas.1908238117)
74. Fatemi SH, Reutiman TJ, Folsom TD, Rustan OG, Rooney RJ, Thuras PD. Downregulation of GABAA receptor protein subunits  $\alpha 6$ ,  $\beta 2$ ,  $\delta$ ,  $\epsilon$ ,  $\gamma 2$ ,  $\theta$ , and  $\rho 2$  in superior frontal cortex of subjects with autism. *J Autism Dev Disord.* 2014;44(8):1833-1845. doi:[10.1007/s10803-014-2078-x](https://doi.org/10.1007/s10803-014-2078-x)
75. Strom SP, Stone JL, Ten Bosch JR, Merriman B, Cantor RM, Geschwind DH, Nelson SF. High-density SNP association study of the 17q21 chromosomal region linked to autism identifies CACNA1G as a novel candidate gene. *Mol Psychiatry.* 2010;15(10):996-1005. doi:[10.1038/mp.2009.41](https://doi.org/10.1038/mp.2009.41)
76. Orabona GM, Griesi-Oliveira K, Vadasz E, Bulcão VL, Takahashi VN, Moreira ES, Furia-Silva M, Ros-Melo AM, Dourado F, Matioli SR, et al. HTR1B and HTR2C in autism spectrum disorders in Brazilian families. *Brain Res.* 2009;1250:14-19. doi:[10.1016/j.brainres.2008.11.007](https://doi.org/10.1016/j.brainres.2008.11.007)
77. Nakamura K, Iwata Y, Anitha A, Miyachi T, Toyota T, Yamada S, Tsujii M, Tsuchiya KJ, Iwayama Y, Yamada K, et al. Replication study of Japanese cohorts supports the role of STX1A in autism susceptibility. *Prog Neuropsychopharmacol Biol Psychiatry.* 2011;35(2):454-458. doi:[10.1016/j.pnpbp.2010.11.033](https://doi.org/10.1016/j.pnpbp.2010.11.033)



78. Torres A, Brownstein CA, Tembulkar SK, Graber K, Genetti C, Kleiman RJ, Sweadner KJ, Mavros C, Liu KX, Smedemark-Margulies N, et al. De novo ATP1A3 and compound heterozygous NLRP3 mutations in a child with autism spectrum disorder, episodic fatigue and somnolence, and mucklewells syndrome. *Mol Genet Metab Rep.* 2018;16:23-29. doi:[10.1016/j.ymgmr.2018.06.001](https://doi.org/10.1016/j.ymgmr.2018.06.001)
79. Kumar RA, Sudi J, Babatz TD, Brune CW, Oswald D, Yen M, Nowak NJ, Cook EH, Christian SL, Dobyms WB. A de novo 1p34.2 microdeletion identifies the synaptic vesicle gene RIMS3 as a novel candidate for autism. *J Med Genet.* 2010;47(2):81-90. doi:[10.1136/jmg.2008.065821](https://doi.org/10.1136/jmg.2008.065821)
80. Dalla Vecchia E, Mortimer N, Palladino VS, Kittel-Schneider S, Lesch KP, Reif A, Schenck A, Norton WHJ. Cross-species models of attention-deficit/hyperactivity disorder and autism spectrum disorder: lessons from CNTNAP2, ADGRL3, and PARK2. *Psychiatr Genet.* 2019;29(1):1-17. doi:[10.1097/YPG.0000000000000211](https://doi.org/10.1097/YPG.0000000000000211)
81. Weissberg O, Elliott E. The Mechanisms of CHD8 in Neurodevelopment and Autism Spectrum Disorders. *Genes (Basel).* 2021;12(8):1133. doi:[10.3390/genes12081133](https://doi.org/10.3390/genes12081133)
82. Hubert L, Cannata Serio M, Villoing-Gaudé L, Boddaert N, Kaminska A, Rio M, Lyonnet S, Munnich A, Poirier K, Simons M, et al. De novo SCAMP5 mutation causes a neurodevelopmental disorder with autistic features and seizures. *J Med Genet.* 2020;57(2):138-144. doi:[10.1136/jmedgenet-2018-105927](https://doi.org/10.1136/jmedgenet-2018-105927)
83. Sriwimol W, Limprasert P. Significant Changes in Plasma Alpha-Synuclein and Beta-Synuclein Levels in Male Children with Autism Spectrum Disorder. *Biomed Res Int.* 2018;2018:4503871. doi:[10.1155/2018/4503871](https://doi.org/10.1155/2018/4503871)
84. Scala M, Zonneveld-Huijssoon E, Brienza M, Mecarelli O, van der Hout AH, Zambrelli E, Turner K, Zara F, Peron A, Vignoli A, et al. De novo ARHGEF9 missense variants associated with neurodevelopmental disorder in females: expanding the genotypic and phenotypic spectrum of ARHGEF9 disease in females. *Neurogenetics.* 2021;22(1):87-94. doi:[10.1007/s10048-020-00622-5](https://doi.org/10.1007/s10048-020-00622-5)
85. Kantojärvi K, Kotala I, Rehnström K, Ylisaukko-Oja T, Vanhala R, von Wendt TN, von Wendt L, Järvelä I. Fine mapping of Xq11.1-q21.33 and mutation screening of RPS6KA6, ZNF711, ACSL4, DLG3, and IL1RAPL2

- for autism spectrum disorders (ASD). *Autism Res.* 2011;4(3):228-233. doi:[10.1002/aur.187](https://doi.org/10.1002/aur.187).
86. Chen J, Chen J, Xu Y, Cheng P, Yu S, Fu Y, Du Y. Retinol-binding protein 4 in combination with lipids to predict the regression phenomenon of autism spectrum disorders. *Lipids Health Dis.* 2021;20(1):93. doi:[10.1186/s12944-021-01522-9](https://doi.org/10.1186/s12944-021-01522-9)
87. Ahmad SF, Nadeem A, Ansari MA, Bakheet SA, Al-Ayadhi LY, Attia SM. Upregulation of IL-9 and JAK-STAT signaling pathway in children with autism. *Prog Neuropsychopharmacol Biol Psychiatry.* 2017;79(Pt B):472-480. doi:[10.1016/j.pnpbp.2017.08.002](https://doi.org/10.1016/j.pnpbp.2017.08.002)
88. Boso M, Emanuele E, Minoretti P, Arra M, Politi P, Ucelli di Nemi S, Barale F. Alterations of circulating endogenous secretory RAGE and S100A9 levels indicating dysfunction of the AGE-RAGE axis in autism. *Neurosci Lett.* 2006;410(3):169-173. doi:[10.1016/j.neulet.2006.08.092](https://doi.org/10.1016/j.neulet.2006.08.092)
89. Russo AJ. Increased Epidermal Growth Factor Receptor (EGFR) Associated with Hepatocyte Growth Factor (HGF) and Symptom Severity in Children with Autism Spectrum Disorders (ASDs). *J Cent Nerv Syst Dis.* 2014;6:79-83. doi:[10.4137/JCNSD.S13767](https://doi.org/10.4137/JCNSD.S13767)
90. Fagan K, Crider A, Ahmed AO, Pillai A. Complement C3 Expression Is Decreased in Autism Spectrum Disorder Subjects and Contributes to Behavioral Deficits in Rodents. *Mol Neuropsychiatry.* 2017;3(1):19-27. doi:[10.1159/000465523](https://doi.org/10.1159/000465523)
91. Patel N, Crider A, Pandya CD, Ahmed AO, Pillai A. Altered mRNA Levels of Glucocorticoid Receptor, Mineralocorticoid Receptor, and Co-Chaperones (FKBP5 and PTGES3) in the Middle Frontal Gyrus of Autism Spectrum Disorder Subjects. *Mol Neurobiol.* 2016;53(4):2090-2099. doi:[10.1007/s12035-015-9178-2](https://doi.org/10.1007/s12035-015-9178-2)
92. Fatemi SH, Reutiman TJ, Folsom TD, Rustan OG, Rooney RJ, Thuras PD. Downregulation of GABAA receptor protein subunits  $\alpha 6$ ,  $\beta 2$ ,  $\delta$ ,  $\epsilon$ ,  $\gamma 2$ ,  $\theta$ , and  $\rho 2$  in superior frontal cortex of subjects with autism. *J Autism Dev Disord.* 2014;44(8):1833-1845. doi:[10.1007/s10803-014-2078-x](https://doi.org/10.1007/s10803-014-2078-x)
93. Guo H, Zhang Q, Dai R, Yu B, Hoekzema K, Tan J, Tan S, Jia X, Chung WK, Hernan R, et al. NCKAP1 Disruptive Variants Lead to a Neurodevelopmental Disorder with Core Features of Autism. *Am J Hum Genet.* 2020;107(5):963-976. doi:[10.1016/j.ajhg.2020.10.002](https://doi.org/10.1016/j.ajhg.2020.10.002)

94. Serajee FJ, Nabi R, Zhong H, Mahbubul Huq AH. Association of INPP1, PIK3CG, and TSC2 gene variants with autistic disorder: implications for phosphatidylinositol signalling in autism. *J Med Genet.* 2003;40(11):e119. doi:[10.1136/jmg.40.11.e119](https://doi.org/10.1136/jmg.40.11.e119)
95. Singh AS, Chandra R, Guhathakurta S, Sinha S, Chatterjee A, Ahmed S, Ghosh S, Rajamma U. Genetic association and gene-gene interaction analyses suggest likely involvement of ITGB3 and TPH2 with autism spectrum disorder (ASD) in the Indian population. *Prog Neuropsychopharmacol Biol Psychiatry.* 2013;45:131-143. doi:[10.1016/j.pnpbp.2013.04.015](https://doi.org/10.1016/j.pnpbp.2013.04.015)
96. Correia CT, Conceição IC, Oliveira B, Coelho J, Sousa I, Sequeira AF, Almeida J, Café C, Duque F, Mouga S, et al. Recurrent duplications of the annexin A1 gene (ANXA1) in autism spectrum disorders. *Mol Autism.* 2014;5(1):28. doi:[10.1186/2040-2392-5-28](https://doi.org/10.1186/2040-2392-5-28)
97. Young N, Asif M, Jackson M, Fernández-Mayoralas DM, de la Peña MJ, Calleja-Pérez B, Álvarez S, Hunter-Featherstone E, Noegel AA, Höhne W, et al. Biallelic SYNE2 Missense Mutations Leading to Nesprin-2 Giant Hypo-Expression Are Associated with Intellectual Disability and Autism. *Genes (Basel).* 2021;12(9):1294. doi:[10.3390/genes12091294](https://doi.org/10.3390/genes12091294)
98. Pichitpunpong C, Thongkorn S, Kanlayaprasit S, Yuwattana W, Plaingam W, Sangsuthum S, Aizat WM, Baharum SN, Tencomnao T, Hu VW, et al. Phenotypic subgrouping and multi-omics analyses reveal reduced diazepam-binding inhibitor (DBI) protein levels in autism spectrum disorder with severe language impairment. *PLoS One.* 2019;14(3):e0214198. doi:[10.1371/journal.pone.0214198](https://doi.org/10.1371/journal.pone.0214198)
99. Balan S, Yamada K, Iwayama Y, Toyota T, Ohnishi T, Maekawa M, Toyoshima M, Iwata Y, Suzuki K, Kikuchi M, et al. Lack of association of EGR2 variants with bipolar disorder in Japanese population. *Gene.* 2013;526(2):246-250. doi:[10.1016/j.gene.2013.05.055](https://doi.org/10.1016/j.gene.2013.05.055)
100. Lohoff FW, Bloch PJ, Weller AE, Ferraro TN, Berrettini WH. Association analysis of the pituitary adenylate cyclase-activating polypeptide (PACAP/ADCYAP1) gene in bipolar disorder. *Psychiatr Genet.* 2008;18(2):53-58. doi:[10.1097/YPG.0b013e3282f60320](https://doi.org/10.1097/YPG.0b013e3282f60320)
101. Ancín I, Barabash A, Vázquez-Álvarez B, Santos JL, Sánchez-Morla E, Martínez JL, Aparicio A, Peláez JC, Díaz JA. Evidence for association of

- the non-duplicated region of CHRNA7 gene with bipolar disorder but not with Schizophrenia. *Psychiatr Genet.* 2010;20(6):289-297. doi:[10.1097/YPG.0b013e32833a9b7a](https://doi.org/10.1097/YPG.0b013e32833a9b7a)
102. Fatjó-Vilas M, Prats C, Pomarol-Clotet E, Lázaro L, Moreno C, González-Ortega I, Lera-Miguel S, Miret S, Muñoz MJ, Ibáñez I, et al. Involvement of NRN1 gene in schizophrenia-spectrum and bipolar disorders and its impact on age at onset and cognitive functioning. *World J Biol Psychiatry.* 2016;17(2):129-139. doi:[10.3109/15622975.2015.1093658](https://doi.org/10.3109/15622975.2015.1093658)
103. Williams MJ, Klockars A, Eriksson A, Voisin S, Dnyansagar R, Wiemerslage L, Kasagiannis A, Akram M, Kheder S, Ambrosi V, et al. The Drosophila ETV5 Homologue Ets96B: Molecular Link between Obesity and Bipolar Disorder. *PLoS Genet.* 2016;12(6):e1006104. doi:[10.1371/journal.pgen.1006104](https://doi.org/10.1371/journal.pgen.1006104)
104. Behan AT, Byrne C, Dunn MJ, Cagney G, Cotter DR. Proteomic analysis of membrane microdomain-associated proteins in the dorsolateral prefrontal cortex in schizophrenia and bipolar disorder reveals alterations in LAMP, STXBP1 and BASP1 protein expression. *Mol Psychiatry.* 2009;14(6):601-613. doi:[10.1038/mp.2008.7](https://doi.org/10.1038/mp.2008.7)
105. Atakhorrani M, Rahimi-Aliabadi S, Jamshidi J, Moslemi E, Movafagh A, Ohadi M, Mirabzadeh A, Emamalizadeh B, Ghaedi H, Gholipour F, et al. A genetic variant in CAMKK2 gene is possibly associated with increased risk of bipolar disorder. *J Neural Transm (Vienna).* 2016;123(3):323-328. doi:[10.1007/s00702-015-1456-7](https://doi.org/10.1007/s00702-015-1456-7)
106. Abou Jamra R, Gobina CM, Becker T, Georgi A, Schulze TG, Schmael C, Cichon S, Propping P, Rietschel M, Nöthen MM, et al. Association study between genetic variants at the VAMP2 and VAMP3 loci and bipolar affective disorder. *Psychiatr Genet.* 2008;18(4):199-203. doi:[10.1097/YPG.0b013e3283050a83](https://doi.org/10.1097/YPG.0b013e3283050a83)
107. Verma R, Kubendran S, Das SK, Jain S, Brahmachari SK. SYNGR1 is associated with schizophrenia and bipolar disorder in southern India. *J Hum Genet.* 2005;50(12):635-640. doi:[10.1007/s10038-005-0307-z](https://doi.org/10.1007/s10038-005-0307-z)
108. Oliveira J, Hamdani N, Etain B, Bennabi M, Boukouaci W, Amokrane K, Fortier C, Marzais F, Bengoufa D, Bellivier F, et al. Genetic association between a 'standing' variant of NOD2 and bipolar disorder. *Immunobiology.* 2014;219(10):766-771. doi:[10.1016/j.imbio.2014.06.003](https://doi.org/10.1016/j.imbio.2014.06.003)

109. Oliveira J, Kazma R, Le Floch E, Bennabi M, Hamdani N, Bengoufa D, Dahoun M, Manier C, Bellivier F, Krishnamoorthy R, et al. Toxoplasma gondii exposure may modulate the influence of TLR2 genetic variation on bipolar disorder: a gene-environment interaction study. *Int J Bipolar Disord*. 2016;4(1):11. doi:[10.1186/s40345-016-0052-6](https://doi.org/10.1186/s40345-016-0052-6)
110. Tesli M, Athanasiu L, Mattingsdal M, Kähler AK, Gustafsson O, Andreassen BK, Werge T, Hansen T, Mors O, Mellerup E, et al. Association analysis of PALB2 and BRCA2 in bipolar disorder and schizophrenia in a scandinavian case-control sample. *Am J Med Genet B Neuropsychiatr Genet*. 2010;153B(7):1276-1282. doi:[10.1002/ajmg.b.31098](https://doi.org/10.1002/ajmg.b.31098)
111. Santos R, Linker SB, Stern S, Mendes APD, Shokhirev MN, Erikson G, Randolph-Moore L, Racha V, Kim Y, Kelsoe JR, et al. Deficient LEF1 expression is associated with lithium resistance and hyperexcitability in neurons derived from bipolar disorder patients. *Mol Psychiatry*. 2021;26(6):2440-2456. doi:[10.1038/s41380-020-00981-3](https://doi.org/10.1038/s41380-020-00981-3)
112. Hu TM, Chen CH, Chuang YA, Hsu SH, Cheng MC. Resequencing of early growth response 2 (EGR2) gene revealed a recurrent patient-specific mutation in schizophrenia. *Psychiatry Res*. 2015;228(3):958-960. doi:[10.1016/j.psychres.2015.05.035](https://doi.org/10.1016/j.psychres.2015.05.035)
113. Miyaoka T, Seno H, Ishino H. Increased expression of Wnt-1 in schizophrenic brains. *Schizophr Res*. 1999;38(1):1-6. doi:[10.1016/s0920-9964\(98\)00179-0](https://doi.org/10.1016/s0920-9964(98)00179-0)
114. Chuang YA, Hu TM, Chen CH, Hsu SH, Tsai HY, Cheng MC. Rare mutations and hypermethylation of the ARC gene associated with schizophrenia. *Schizophr Res*. 2016;176(2-3):106-113. doi:[10.1016/j.schres.2016.07.019](https://doi.org/10.1016/j.schres.2016.07.019)
115. Koga M, Ishiguro H, Horiuchi Y, Inada T, Ujike H, Itokawa M, Otowa T, Watanabe Y, Someya T, Arinami T. Replication study of association between ADCYAP1 gene polymorphisms and schizophrenia. *Psychiatr Genet*. 2010;20(3):123-125. doi:[10.1097/YPG.0b013e32833a1f52](https://doi.org/10.1097/YPG.0b013e32833a1f52)
116. Roberts E. GABAergic malfunction in the limbic system resulting from an aboriginal genetic defect in voltage-gated Na<sup>+</sup>-channel SCN5A is proposed to give rise to susceptibility to schizophrenia. *Adv Pharmacol*. 2006;54:119-145. doi:[10.1016/s1054-3589\(06\)54006-2](https://doi.org/10.1016/s1054-3589(06)54006-2)



117. Kimura H, Fujita Y, Kawabata T, Ishizuka K, Wang C, Iwayama Y, Okahisa Y, Kushima I, Morikawa M, Uno Y, et al. A novel rare variant R292H in RTN4R affects growth cone formation and possibly contributes to schizophrenia susceptibility. *Transl Psychiatry*. 2017;7(8):e1214. doi:[10.1038/tp.2017.170](https://doi.org/10.1038/tp.2017.170)
118. Bakanidze G, Roinishvili M, Chkonia E, Kitzrow W, Richter S, Neumann K, Herzog MH, Brand A, Puls I. Association of the Nicotinic Receptor  $\alpha 7$  Subunit Gene (CHRNA7) with Schizophrenia and Visual Backward Masking. *Front Psychiatry*. 2013;4:133. doi:[10.3389/fpsy.2013.00133](https://doi.org/10.3389/fpsy.2013.00133)
119. Hwang H, Szucs MJ, Ding LJ, Allen A, Ren X, Haensgen H, Gao F, Rhim H, Andrade A, Pan JQ, et al. Neurogranin, Encoded by the Schizophrenia Risk Gene NRGN, Bidirectionally Modulates Synaptic Plasticity via Calmodulin-Dependent Regulation of the Neuronal Phosphoproteome. *Biol Psychiatry*. 2021;89(3):256-269. doi:[10.1016/j.biopsych.2020.07.014](https://doi.org/10.1016/j.biopsych.2020.07.014)
120. Boiko AS, Ivanova SA, Pozhidaev IV, Freidin MB, Osmanova DZ, Fedorenko OY, Semke AV, Bokhan NA, Wilffert B, Loonen AJM. Pharmacogenetics of tardive dyskinesia in schizophrenia: The role of CHRM1 and CHRM2 muscarinic receptors. *World J Biol Psychiatry*. 2020;21(1):72-77. doi:[10.1080/15622975.2018.1548780](https://doi.org/10.1080/15622975.2018.1548780)
121. Bourin M, Malinge M, Vasar E, Bradwejn J. Two faces of cholecystokinin: anxiety and schizophrenia. *Fundam Clin Pharmacol*. 1996;10(2):116-126. doi:[10.1111/j.1472-8206.1996.tb00154.x](https://doi.org/10.1111/j.1472-8206.1996.tb00154.x)
122. Xu FL, Yao J, Wu X, Xia X, Xing JX, Xuan JF, Liu YP, Wang BJ. Association Analysis Between SNPs in the Promoter Region of RGS4 and Schizophrenia in the Northern Chinese Han Population. *Neuropsychiatr Dis Treat*. 2020;16:985-992. doi:[10.2147/NDT.S250282](https://doi.org/10.2147/NDT.S250282)
123. Fernandez-Enright F, Andrews JL, Newell KA, Pantelis C, Huang XF. Novel implications of Lingo-1 and its signaling partners in schizophrenia. *Transl Psychiatry*. 2014;4(1):e348. doi:[10.1038/tp.2013.121](https://doi.org/10.1038/tp.2013.121)
124. Jiang J, Long J, Ling W, Huang G, Su L. Genetic variation in the 3'-untranslated region of PAK1 influences schizophrenia susceptibility. *Exp Ther Med*. 2017;13(3):1101-1108. doi:[10.3892/etm.2017.4039](https://doi.org/10.3892/etm.2017.4039)

125. Vlaskamp DRM, Bassett AS, Sullivan JE, Robblee J, Sadleir LG, Scheffer IE, Andrade DM. Schizophrenia is a later-onset feature of PCDH19 Girls Clustering Epilepsy. *Epilepsia*. 2019;60(3):429-440. doi:[10.1111/epi.14678](https://doi.org/10.1111/epi.14678)
126. Chandler D, Dragović M, Cooper M, Badcock JC, Mullin BH, Faulkner D, Wilson SG, Hallmayer J, Howell S, Rock D, et al. Impact of Neuritin 1 (NRN1) polymorphisms on fluid intelligence in schizophrenia. *Am J Med Genet B Neuropsychiatr Genet*. 2010;153B(2):428-437. doi:[10.1002/ajmg.b.30996](https://doi.org/10.1002/ajmg.b.30996)
127. Chamera K, Kotarska K, Szuster-Głuszczyk M, Trojan E, Skórkowska A, Pomierny B, Krzyżanowska W, Bryniarska N, Basta-Kaim A. The prenatal challenge with lipopolysaccharide and polyinosinic:polycytidylic acid disrupts CX3CL1-CX3CR1 and CD200-CD200R signalling in the brains of male rat offspring: a link to schizophrenia-like behaviours. *J Neuroinflammation*. 2020;17(1):247. doi:[10.1186/s12974-020-01923-0](https://doi.org/10.1186/s12974-020-01923-0)
128. Ji W, Li T, Pan Y, Tao H, Ju K, Wen Z, Fu Y, An Z, Zhao Q, Wang T, et al. CNTNAP2 is significantly associated with schizophrenia and major depression in the Han Chinese population. *Psychiatry Res*. 2013;207(3):225-228. doi:[10.1016/j.psychres.2012.09.024](https://doi.org/10.1016/j.psychres.2012.09.024)
129. Tao R, Li C, Newburn EN, Ye T, Lipska BK, Herman MM, Weinberger DR, Kleinman JE, Hyde TM. Transcript-specific associations of SLC12A5 (KCC2) in human prefrontal cortex with development, schizophrenia, and affective disorders. *J Neurosci*. 2012;32(15):5216-5222. doi:[10.1523/JNEUROSCI.4626-11.2012](https://doi.org/10.1523/JNEUROSCI.4626-11.2012)
130. Meyer MA. Neuronal localization of GAS7 within human brain tissue: Implications for schizophrenia research. *Neurol Int*. 2018;10(4):7563. doi:[10.4081/ni.2018.7563](https://doi.org/10.4081/ni.2018.7563)
131. Wilcox JA, Quadri S. Replication of NTNG1 association in schizophrenia. *Psychiatr Genet*. 2014;24(6):266-268. doi:[10.1097/YPG.0000000000000061](https://doi.org/10.1097/YPG.0000000000000061)
132. Blennow K, Bogdanovic N, Heilig M, Grenfeldt B, Karlsson I, Davidsson P. Reduction of the synaptic protein rab3a in the thalamus and connecting brain regions in post-mortem schizophrenic brains. *J Neural Transm (Vienna)*. 2000;107(8-9):1085-1097. doi:[10.1007/s007020070054](https://doi.org/10.1007/s007020070054)



133. Kishi T, Ikeda M, Kitajima T, Yamanouchi Y, Kinoshita Y, Kawashima K, Okochi T, Inada T, Ozaki N, Iwata N. Genetic association analysis of tagging SNPs in alpha4 and beta2 subunits of neuronal nicotinic acetylcholine receptor genes (CHRNA4 and CHRNB2) with schizophrenia in the Japanese population. *J Neural Transm (Vienna)*. 2008;115(10):1457-1461. doi:[10.1007/s00702-008-0114-8](https://doi.org/10.1007/s00702-008-0114-8)
134. Cantrup R, Sathanantham K, Rushlow WJ, Rajakumar N. Chronic hyperdopaminergic activity of schizophrenia is associated with increased  $\Delta$ FosB levels and cdk-5 signaling in the nucleus accumbens. *Neuroscience*. 2012;222:124-135. doi:[10.1016/j.neuroscience.2012.07.027](https://doi.org/10.1016/j.neuroscience.2012.07.027)
135. Guan F, Lin H, Chen G, Li L, Chen T, Liu X, Han J, Li T. Evaluation of association of common variants in HTR1A and HTR5A with schizophrenia and executive function. *Sci Rep*. 2016;6:38048. doi:[10.1038/srep38048](https://doi.org/10.1038/srep38048)
136. Perez-Becerril C, Morris AG, Mortimer A, McKenna PJ, de Bellerocche J. Common variants in the chromosome 2p23 region containing the SLC30A3 (ZnT3) gene are associated with schizophrenia in female but not male individuals in a large collection of European samples. *Psychiatry Res*. 2016;246:335-340. doi:[10.1016/j.psychres.2016.09.052](https://doi.org/10.1016/j.psychres.2016.09.052)
137. Schuhmacher A, Mössner R, Quednow BB, Kühn KU, Wagner M, Cvetanovska G, Rujescu D, Zill P, Möller HJ, Rietschel M, et al. Influence of 5-HT3 receptor subunit genes HTR3A, HTR3B, HTR3C, HTR3D and HTR3E on treatment response to antipsychotics in schizophrenia. *Pharmacogenet Genomics*. 2009;19(11):843-851. doi:[10.1097/FPC.0b013e3283313296](https://doi.org/10.1097/FPC.0b013e3283313296)
138. Grubor M, Zivkovic M, Sagud M, Nikolac Perkovic M, Mihaljevic-Peles A, Pivac N, Muck-Seler D, Svob Strac D. HTR1A, HTR1B, HTR2A, HTR2C and HTR6 Gene Polymorphisms and Extrapyrmidal Side Effects in Haloperidol-Treated Patients with Schizophrenia. *Int J Mol Sci*. 2020;21(7):2345. doi:[10.3390/ijms21072345](https://doi.org/10.3390/ijms21072345)
139. Matosin N, Fernandez-Enright F, Fung SJ, Lum JS, Engel M, Andrews JL, Huang XF, Weickert CS, Newell KA. Alterations of mGluR5 and its endogenous regulators Norbin, Tamalin and Preso1 in schizophrenia: towards a model of mGluR5 dysregulation. *Acta Neuropathol*. 2015;130(1):119-129. doi:[10.1007/s00401-015-1411-6](https://doi.org/10.1007/s00401-015-1411-6)

140. Kawashima K, Kishi T, Ikeda M, Kitajima T, Yamanouchi Y, Kinoshita Y, Takahashi N, Saito S, Ohi K, Yasuda Y, et al. No association between tagging SNPs of SNARE complex genes (STX1A, VAMP2 and SNAP25) and schizophrenia in a Japanese population. *Am J Med Genet B Neuropsychiatr Genet.* 2008;147B(7):1327-1331. doi:[10.1002/ajmg.b.30781](https://doi.org/10.1002/ajmg.b.30781)
141. Tsunoka T, Kishi T, Kitajima T, Okochi T, Okumura T, Yamanouchi Y, Kinoshita Y, Kawashima K, Naitoh H, Inada T, et al. Association analysis of GRM2 and HTR2A with methamphetamine-induced psychosis and schizophrenia in the Japanese population. *Prog Neuropsychopharmacol Biol Psychiatry.* 2010;34(4):639-644. doi:[10.1016/j.pnpbp.2010.03.002](https://doi.org/10.1016/j.pnpbp.2010.03.002)
142. Wilmsdorff MV, Blaich C, Zink M, Treutlein J, Bauer M, Schulze T, Schneider-Axmann T, Gruber O, Rietschel M, Schmitt A, et al. Gene expression of glutamate transporters SLC1A1, SLC1A3 and SLC1A6 in the cerebellar subregions of elderly schizophrenia patients and effects of antipsychotic treatment. *World J Biol Psychiatry.* 2013;14(7):490-499. doi:[10.3109/15622975.2011.645877](https://doi.org/10.3109/15622975.2011.645877)
143. Xiao MF, Roh SE, Zhou J, Chien CC, Lucey BP, Craig MT, Hayes LN, Coughlin JM, Leweke FM, Jia M, et al. A biomarker-authenticated model of schizophrenia implicating NPTX2 loss of function. *Sci Adv.* 2021;7(48):eabf6935. doi:[10.1126/sciadv.abf6935](https://doi.org/10.1126/sciadv.abf6935)
144. Sayad A, Ranjbaran F, Ghafouri-Fard S, Arsang-Jang S, Taheri M. Expression Analysis of CYFIP1 and CAMKK2 Genes in the Blood of Epileptic and Schizophrenic Patients. *J Mol Neurosci.* 2018;65(3):336-342. doi:[10.1007/s12031-018-1106-2](https://doi.org/10.1007/s12031-018-1106-2)
145. Zhang T, Tang Y, Yang X, Wang X, Ding S, Huang K, Liu Y, Lang B. Expression of GSK3 $\beta$ , PICK1, NEFL, C4, NKCC1 and Synaptophysin in peripheral blood mononuclear cells of the first-episode schizophrenia patients. *Asian J Psychiatr.* 2021;55:102520. doi:[10.1016/j.ajp.2020.102520](https://doi.org/10.1016/j.ajp.2020.102520)
146. Kawashima K, Kishi T, Ikeda M, Kitajima T, Yamanouchi Y, Kinoshita Y, Takahashi N, Saito S, Ohi K, Yasuda Y, et al. No association between tagging SNPs of SNARE complex genes (STX1A, VAMP2 and SNAP25) and schizophrenia in a Japanese population. *Am J Med Genet B Neuropsychiatr Genet.* 2008;147B(7):1327-1331. doi:[10.1002/ajmg.b.30781](https://doi.org/10.1002/ajmg.b.30781)
147. Chaumette B, Ferrafiat V, Ambalavanan A, Goldenberg A, Dionne-Laporte A, Spiegelman D, Dion PA, Gerardin P, Laurent C, Cohen D, et al.

- Missense variants in ATP1A3 and FXYP gene family are associated with childhood-onset schizophrenia. *Mol Psychiatry*. 2020;25(4):821-830. doi:[10.1038/s41380-018-0103-8](https://doi.org/10.1038/s41380-018-0103-8)
148. Onwordi EC, Whitehurst T, Mansur A, Statton B, Berry A, Quinlan M, O'Regan DP, Rogdaki M, Marques TR, Rabiner EA, et al. The relationship between synaptic density marker SV2A, glutamate and N-acetyl aspartate levels in healthy volunteers and schizophrenia: a multimodal PET and magnetic resonance spectroscopy brain imaging study. *Transl Psychiatry*. 2021;11(1):393. doi:[10.1038/s41398-021-01515-3](https://doi.org/10.1038/s41398-021-01515-3)
149. Ji W, Li T, Pan Y, Tao H, Ju K, Wen Z, Fu Y, An Z, Zhao Q, Wang T, et al. CNTNAP2 is significantly associated with schizophrenia and major depression in the Han Chinese population. *Psychiatry Res*. 2013;207(3):225-228. doi:[10.1016/j.psychres.2012.09.024](https://doi.org/10.1016/j.psychres.2012.09.024)
150. Di Maio A, De Rosa A, Pelucchi S, Garofalo M, Marciano B, Nuzzo T, Gardoni F, Isidori AM, Di Luca M, Errico F, et al. Analysis of mRNA and Protein Levels of CAP2, DLG1 and ADAM10 Genes in Post-Mortem Brain of Schizophrenia, Parkinson's and Alzheimer's Disease Patients. *Int J Mol Sci*. 2022;23(3):1539. doi:[10.3390/ijms23031539](https://doi.org/10.3390/ijms23031539)
151. Iatropoulos P, Gardella R, Valsecchi P, Magri C, Ratti C, Podavini D, Rossi G, Gennarelli M, Sacchetti E, Barlati S. et al. Association study and mutational screening of SYNGR1 as a candidate susceptibility gene for schizophrenia. *Psychiatr Genet*. 2009;19(5):237-243. doi:[10.1097/YPG.0b013e32832cebf7](https://doi.org/10.1097/YPG.0b013e32832cebf7)
152. Noori-Dalooi MR, Kheirollahi M, Mahbod P, Mohammadi F, Astaneh AN, Zarindast MR, Azimi C, Mohammadi MR. Alpha- and beta-synucleins mRNA expression in lymphocytes of schizophrenia patients. *Genet Test Mol Biomarkers*. 2010;14(5):725-729. doi:[10.1089/gtmb.2010.0050](https://doi.org/10.1089/gtmb.2010.0050).
153. Chen PY, Huang MC, Chiu CC, Liu HC, Lu ML, Chen CH. Association of plasma retinol-binding protein-4, adiponectin, and high molecular weight adiponectin with metabolic adversities in patients with schizophrenia. *Prog Neuropsychopharmacol Biol Psychiatry*. 2011;35(8):1927-1932. doi:[10.1016/j.pnpbp.2011.07.014](https://doi.org/10.1016/j.pnpbp.2011.07.014)
154. Ratta-Apha W, Mouri K, Boku S, Ishiguro H, Okazaki S, Otsuka I, Sora I, Arinami T, Shirakawa O, Hishimoto A. A decrease in protein level

- and a missense polymorphism of KIF17 are associated with schizophrenia. *Psychiatry Res.* 2015;230(2):424-429. doi:[10.1016/j.psychres.2015.09.031](https://doi.org/10.1016/j.psychres.2015.09.031)
155. Hill MJ, Kenny E, Roche S, Morris DW, Corvin A, Hawi Z, Gill M, Anney RJ. Allelic expression imbalance of the schizophrenia susceptibility gene CHI3L1: evidence of cis-acting variation and tissue specific regulation. *Psychiatr Genet.* 2011;21(6):281-286. doi:[10.1097/YPG.0b013e328348045b](https://doi.org/10.1097/YPG.0b013e328348045b)
156. Rasmussen HB, Timm S, Wang AG, S ebye K, Lublin H, Fenger M, Hemmingsen R, Werge T. Association between the CCR5 32-bp deletion allele and late onset of schizophrenia. *Am J Psychiatry.* 2006;163(3):507-511. doi:[10.1176/appi.ajp.163.3.507](https://doi.org/10.1176/appi.ajp.163.3.507)
157. Zakharyan R, Khoyetsyan A, Arakelyan A, Boyajyan A, Gevorgyan A, Stahelova A, Mrazek F, Petrek M. Association of C1QB gene polymorphism with schizophrenia in Armenian population. *BMC Med Genet.* 2011;12:126. doi:[10.1186/1471-2350-12-126](https://doi.org/10.1186/1471-2350-12-126)
158. Kwon J, Suessmilch M, McColl A, Cavanagh J, Morris BJ. Distinct trans-placental effects of maternal immune activation by TLR3 and TLR7 agonists: implications for schizophrenia risk. *Sci Rep.* 2021;11(1):23841. doi:[10.1038/s41598-021-03216-9](https://doi.org/10.1038/s41598-021-03216-9)
159. Aflouk Y, Inoubli O, Saoud H, Zaafrane F, Gaha L, Bel Hadj Jrad B. Association between TLR2 polymorphisms (-196-174 Ins/Del, R677W, R753Q, and P631H) and schizophrenia in a Tunisian population. *Immunol Res.* 2021;69(6):541-552. doi:[10.1007/s12026-021-09238-9](https://doi.org/10.1007/s12026-021-09238-9)
160. Lahdelma L, Jee KJ, Joffe G, Tchoukhine E, Oksanen J, Kaur S, Knuutila S, Andersson LC. Altered expression of myeloperoxidase precursor, myeloid cell nuclear differentiation antigen, Fms-related tyrosine kinase 3 ligand, and antigen CD11A genes in leukocytes of clozapine-treated schizophrenic patients. *J Clin Psychopharmacol.* 2006;26(3):335-338. doi:[10.1097/01.jcp.0000218984.99801.b6](https://doi.org/10.1097/01.jcp.0000218984.99801.b6)
161. Li H, Zhang Q, Li N, Wang F, Xiang H, Zhang Z, Su Y, Huang Y, Zhang S, Zhao G, et al. Plasma levels of Th17-related cytokines and complement C3 correlated with aggressive behavior in patients with schizophrenia. *Psychiatry Res.* 2016;246:700-706. doi:[10.1016/j.psychres.2016.10.061](https://doi.org/10.1016/j.psychres.2016.10.061)

162. Ghazaryan H, Petrek M, Boyajyan A. Chronic schizophrenia is associated with over-expression of the interleukin-2 receptor gamma gene. *Psychiatry Res.* 2014;217(3):158-162. doi:[10.1016/j.psychres.2014.03.020](https://doi.org/10.1016/j.psychres.2014.03.020)
163. Shirts BH, Kim JJ, Reich S, Dickerson FB, Yolken RH, Devlin B, Nimgaonkar VL. Polymorphisms in MICB are associated with human herpes virus seropositivity and schizophrenia risk. *Schizophr Res.* 2007;94(1-3):342-353. doi:[10.1016/j.schres.2007.04.021](https://doi.org/10.1016/j.schres.2007.04.021)
164. Daskalakis NP, Binder EB. Schizophrenia in the spectrum of gene-stress interactions: the FKBP5 example. *Schizophr Bull.* 2015;41(2):323-329. doi:[10.1093/schbul/sbu189](https://doi.org/10.1093/schbul/sbu189)
165. Pinacho R, Villalmanzo N, Meana JJ, Ferrer I, Berengueras A, Haro JM, Villén J, Ramos B. Altered CSNK1E, FABP4 and NEFH protein levels in the dorsolateral prefrontal cortex in schizophrenia. *Schizophr Res.* 2016;177(1-3):88-97. doi:[10.1016/j.schres.2016.04.050](https://doi.org/10.1016/j.schres.2016.04.050)
166. Gross J, Grimm O, Ortega G, Teuber I, Lesch KP, Meyer J. Mutational analysis of the neuronal cadherin gene CELSR1 and exclusion as a candidate for catatonic schizophrenia in a large family. *Psychiatr Genet.* 2001;11(4):197-200. doi:[10.1097/00041444-200112000-00003](https://doi.org/10.1097/00041444-200112000-00003)
167. Ashbrook DG, Cahill S, Hager R. A Cross-Species Systems Genetics Analysis Links APBB1IP as a Candidate for Schizophrenia and Prepulse Inhibition. *Front Behav Neurosci.* 2019;13:266. doi:[10.3389/fnbeh.2019.00266](https://doi.org/10.3389/fnbeh.2019.00266)
168. Löffler S, Klimke A, Kronenwett R, Kobbe G, Haas R, Fehsel K. Clozapine mobilizes CD34+ hematopoietic stem and progenitor cells and increases plasma concentration of interleukin 6 in patients with schizophrenia. *J Clin Psychopharmacol.* 2010;30(5):591-595. doi:[10.1097/JCP.0b013e3181eeb7f7](https://doi.org/10.1097/JCP.0b013e3181eeb7f7)
169. Wang KS, Liu X, Arana TB, Thompson N, Weisman H, Devargas C, Mao C, Su BB, Camarillo C, Escamilla MA, et al. Genetic association analysis of ITGB3 polymorphisms with age at onset of schizophrenia. *J Mol Neurosci.* 2013;51(2):446-453. doi:[10.1007/s12031-013-0059-8](https://doi.org/10.1007/s12031-013-0059-8)
170. Joaquim HPG, Costa AC, Serpa MH, Talib LL, Gattaz WF. Reduced Annexin A3 in schizophrenia. *Eur Arch Psychiatry Clin Neurosci.* 2020;270(4):489-494. doi:[10.1007/s00406-019-01048-3](https://doi.org/10.1007/s00406-019-01048-3)



171. Lajin B, Alachkar A, Michati R, Alhaj Sakur A. Association between polymorphisms in the genes for tumor suppressor protein p53 and its regulator NAD(P)H: quinone oxidoreductase 1 (NQO1) and schizophrenia in a Syrian study cohort. *Arch Med Res.* 2013;44(2):121-126. doi:[10.1016/j.arcmed.2012.12.009](https://doi.org/10.1016/j.arcmed.2012.12.009)
172. Chittiprol S, Venkatasubramanian G, Neelakantachar N, Reddy NA, Shetty KT, Gangadhar BN. Longitudinal study of beta2-microglobulin abnormalities in schizophrenia. *Int Immunopharmacol.* 2009;9(10):1215-1217. doi:[10.1016/j.intimp.2009.07.002](https://doi.org/10.1016/j.intimp.2009.07.002)
173. Scarr E, Udawela M, Greenough MA, Neo J, Suk Seo M, Money TT, Upadhyay A, Bush AI, Everall IP, Thomas EA, et al. Increased cortical expression of the zinc transporter SLC39A12 suggests a breakdown in zinc cellular homeostasis as part of the pathophysiology of schizophrenia. *NPJ Schizophr.* 2016;2:16002. doi:[10.1038/npjschz.2016.2](https://doi.org/10.1038/npjschz.2016.2)
174. Bi XJ, Hu L, Qiao DD, Han C, Sun MM, Cui KY, Wang LN, Yang LM, Liu LF, Chen ZY. Evidence for an Interaction Between NEDD4 and Childhood Trauma on Clinical Characters of Schizophrenia With Family History of Psychosis. *Front Psychiatry.* 2021;12:608231. doi:[10.3389/fpsy.2021.608231](https://doi.org/10.3389/fpsy.2021.608231)
175. Müller N, Schwarz MJ. COX-2 inhibition in schizophrenia and major depression. *Curr Pharm Des.* 2008;14(14):1452-1465. doi:[10.2174/138161208784480243](https://doi.org/10.2174/138161208784480243)
176. Nursal AF, Aydin PC, Pehlivan M, Sever U, Pehlivan S. UCP2 and CFH Gene Variants with Genetic Susceptibility to Schizophrenia in Turkish Population. *Endocr Metab Immune Disord Drug Targets.* 2021;21(11):2084-2089. doi:[10.2174/1871530320999201113103730](https://doi.org/10.2174/1871530320999201113103730)
177. Numata S, Ueno S, Iga J, Yamauchi K, Hongwei S, Hashimoto R, Takeda M, Kunugi H, Itakura M, Ohmori T. TGFBR2 gene expression and genetic association with schizophrenia. *J Psychiatr Res.* 2008;42(6):425-432. doi:[10.1016/j.jpsychires.2007.04.002](https://doi.org/10.1016/j.jpsychires.2007.04.002)
178. Chen CY, Liu HY, Hsueh YP. TLR3 downregulates expression of schizophrenia gene Disc1 via MYD88 to control neuronal morphology. *EMBO Rep.* 2017;18(1):169-183. doi:[10.15252/embr.201642586](https://doi.org/10.15252/embr.201642586)
179. Supriyanto I, Watanabe Y, Mouri K, Shiroiwa K, Ratta-Apha W, Yoshida M, Tamiya G, Sasada T, Eguchi N, Okazaki K, et al. A missense

- mutation in the ITGA8 gene, a cell adhesion molecule gene, is associated with schizophrenia in Japanese female patients. *Prog Neuropsychopharmacol Biol Psychiatry*. 2013;40:347-352. doi:[10.1016/j.pnpbp.2012.11.002](https://doi.org/10.1016/j.pnpbp.2012.11.002)
180. Warburton A, Breen G, Rujescu D, Bubb VJ, Quinn JP. Characterization of a REST-Regulated Internal Promoter in the Schizophrenia Genome-Wide Associated Gene MIR137. *Schizophr Bull*. 2015;41(3):698-707. doi:[10.1093/schbul/sbu117](https://doi.org/10.1093/schbul/sbu117)
181. Shen Q, Zhang J, Wang Y, Liu B, Li X, Zhao Q, Chen S, Ji J, Yang F, Wan C, et al. No association between the KCNH1, KCNJ10 and KCNN3 genes and schizophrenia in the Han Chinese population. *Neurosci Lett*. 2011;487(1):61-65. doi:[10.1016/j.neulet.2010.09.074](https://doi.org/10.1016/j.neulet.2010.09.074)
182. Wei L, Chen C, Ding L, Mo M, Zou J, Lu Z, Li H, Wu H, Dai Y, Xu P, et al. Wnt1 Promotes EAAT2 Expression and Mediates the Protective Effects of Astrocytes on Dopaminergic Cells in Parkinson's Disease. *Neural Plast*. 2019;2019:1247276. doi:[10.1155/2019/1247276](https://doi.org/10.1155/2019/1247276)
183. Koob AO, Shaked GM, Bender A, Bisquertt A, Rockenstein E, Masliah E. Neurogranin binds  $\alpha$ -synuclein in the human superior temporal cortex and interaction is decreased in Parkinson's disease. *Brain Res*. 2014;1591:102-110. doi:[10.1016/j.brainres.2014.10.013](https://doi.org/10.1016/j.brainres.2014.10.013)
184. Goldman JG, Marr D, Zhou L, Ouyang B, Leurgans SE, Berry-Kravis E, Goetz CG. Racial differences may influence the role of cholecystokinin polymorphisms in Parkinson's disease hallucinations. *Mov Disord*. 2011;26(9):1781-1782. doi:[10.1002/mds.23655](https://doi.org/10.1002/mds.23655)
185. Ko WK, Martin-Negrier ML, Bezard E, Crossman AR, Ravenscroft P. RGS4 is involved in the generation of abnormal involuntary movements in the unilateral 6-OHDA-lesioned rat model of Parkinson's disease. *Neurobiol Dis*. 2014;70:138-148. doi:[10.1016/j.nbd.2014.06.013](https://doi.org/10.1016/j.nbd.2014.06.013)
186. Hong CT, Chen KY, Wang W, Chiu JY, Wu D, Chao TY, Hu CJ, Chau KD, Bamodu OA. Insulin Resistance Promotes Parkinson's Disease through Aberrant Expression of  $\alpha$ -Synuclein, Mitochondrial Dysfunction, and Deregulation of the Polo-Like Kinase 2 Signaling. *Cells*. 2020;9(3):740. doi:[10.3390/cells9030740](https://doi.org/10.3390/cells9030740)



187. Deng H, Gu S, Jankovic J. LINGO1 variants in essential tremor and Parkinson's disease. *Acta Neurol Scand.* 2012;125(1):1-7. doi:[10.1111/j.1600-0404.2011.01516.x](https://doi.org/10.1111/j.1600-0404.2011.01516.x)
188. Ahn EH, Kang SS, Qi Q, Liu X, Ye K. Netrin1 deficiency activates MST1 via UNC5B receptor, promoting dopaminergic apoptosis in Parkinson's disease. *Proc Natl Acad Sci U S A.* 2020;117(39):24503-24513. doi:[10.1073/pnas.2004087117](https://doi.org/10.1073/pnas.2004087117)
189. Dong Y, Xiong J, Ji L, Xue X. MiR-421 Aggravates Neurotoxicity and Promotes Cell Death in Parkinson's Disease Models by Directly Targeting MEF2D. *Neurochem Res.* 2021;46(2):299-308. doi:[10.1007/s11064-020-03166-0](https://doi.org/10.1007/s11064-020-03166-0)
190. Angelopoulou E, Paudel YN, Shaikh MF, Piperi C. Fractalkine (CX3CL1) signaling and neuroinflammation in Parkinson's disease: Potential clinical and therapeutic implications. *Pharmacol Res.* 2020;158:104930. doi:[10.1016/j.phrs.2020.104930](https://doi.org/10.1016/j.phrs.2020.104930)
191. Ryo A, Togo T, Nakai T, Hirai A, Nishi M, Yamaguchi A, Suzuki K, Hirayasu Y, Kobayashi H, Perrem K, et al. Prolyl-isomerase Pin1 accumulates in lewy bodies of parkinson disease and facilitates formation of alpha-synuclein inclusions. *J Biol Chem.* 2006;281(7):4117-4125. doi:[10.1074/jbc.M507026200](https://doi.org/10.1074/jbc.M507026200)
192. Walker DG, Beach TG, Xu R, Lile J, Beck KD, McGeer EG, McGeer PL. Expression of the proto-oncogene Ret, a component of the GDNF receptor complex, persists in human substantia nigra neurons in Parkinson's disease. *Brain Res.* 1998;792(2):207-217. doi:[10.1016/s0006-8993\(98\)00131-0](https://doi.org/10.1016/s0006-8993(98)00131-0)
193. Anantha J, Goulding SR, Tuboly E, O'Mahony AG, Moloney GM, Lomansey G, McCarthy CM, Collins LM, Sullivan AM, O'Keeffe GW. NME1 Protects Against Neurotoxin-,  $\alpha$ -Synuclein- and LRRK2-Induced Neurite Degeneration in Cell Models of Parkinson's Disease. *Mol Neurobiol.* 2022;59(1):61-76. doi:[10.1007/s12035-021-02569-6](https://doi.org/10.1007/s12035-021-02569-6)
194. Chang KH, Chen CM, Chen YC, Fung HC, Wu YR. Polymorphisms of ACMSD-TMEM163, MCCC1, and BCKDK-STX1B Are Not Associated with Parkinson's Disease in Taiwan. *Parkinsons Dis.* 2019;2019:3489638. doi:[10.1155/2019/3489638](https://doi.org/10.1155/2019/3489638)

195. Cheng X, Xu S, Zhang C, Qin K, Yan J, Shao X. The BRCC3 regulated by Cdk5 promotes the activation of neuronal NLRP3 inflammasome in Parkinson's disease models. *Biochem Biophys Res Commun.* 2020;522(3):647-654. doi:[10.1016/j.bbrc.2019.11.141](https://doi.org/10.1016/j.bbrc.2019.11.141)
196. Lang Y, Li Y, Yu H, Lin L, Chen X, Wang S, Zhang H. HOTAIR drives autophagy in midbrain dopaminergic neurons in the substantia nigra compacta in a mouse model of Parkinson's disease by elevating NPTX2 via miR-221-3p binding. *Aging (Albany NY).* 2020;12(9):7660-7678. doi:[10.18632/aging.103028](https://doi.org/10.18632/aging.103028)
197. Kim K, Wi S, Seo JH, Pyo S, Cho SR. Reduced Interaction of Aggregated  $\alpha$ -Synuclein and VAMP2 by Environmental Enrichment Alleviates Hyperactivity and Anxiety in a Model of Parkinson's Disease. *Genes (Basel).* 2021;12(3):392. doi:[10.3390/genes12030392](https://doi.org/10.3390/genes12030392)
198. Wong TH, Chiu WZ, Breedveld GJ, Li KW, Verkerk AJ, Hondius D, Hukema RK, Seelaar H, Frick P, Severijnen LA, et al. PRKAR1B mutation associated with a new neurodegenerative disorder with unique pathology. *Brain.* 2014;137(Pt 5):1361-1373. doi:[10.1093/brain/awu067](https://doi.org/10.1093/brain/awu067)
199. Beyer K, Ispierto L, Latorre P, Tolosa E, Ariza A. Alpha- and beta-synuclein expression in Parkinson disease with and without dementia. *J Neurol Sci.* 2011;310(1-2):112-117. doi:[10.1016/j.jns.2011.05.049](https://doi.org/10.1016/j.jns.2011.05.049)
200. Liu Q, Bautista-Gomez J, Higgins DA, Yu J, Xiong Y. Dysregulation of the AP2M1 phosphorylation cycle by LRRK2 impairs endocytosis and leads to dopaminergic neurodegeneration. *Sci Signal.* 2021;14(693):eabg3555. doi:[10.1126/scisignal.abg3555](https://doi.org/10.1126/scisignal.abg3555)
201. Horvath I, Iashchishyn IA, Moskalenko RA, Wang C, Wärmländer SKTS, Wallin C, Gräslund A, Kovacs GG, Morozova-Roche LA. Co-aggregation of pro-inflammatory S100A9 with  $\alpha$ -synuclein in Parkinson's disease: ex vivo and in vitro studies. *J Neuroinflammation.* 2018;15(1):172. doi:[10.1186/s12974-018-1210-9](https://doi.org/10.1186/s12974-018-1210-9)
202. Campolo M, Filippone A, Biondo C, Mancuso G, Casili G, Lanza M, Cuzzocrea S, Esposito E, Paterniti I. TLR7/8 in the Pathogenesis of Parkinson's Disease. *Int J Mol Sci.* 2020;21(24):9384. doi:[10.3390/ijms21249384](https://doi.org/10.3390/ijms21249384)
203. Halbgebauer S, Nagl M, Klafki H, Haußmann U, Steinacker P, Oeckl P, Kassubek J, Pinkhardt E, Ludolph AC, Soininen H, et al. Modified

- serpinA1 as risk marker for Parkinson's disease dementia: Analysis of baseline data. *Sci Rep.* 2016;6:26145. doi:[10.1038/srep26145](https://doi.org/10.1038/srep26145)
204. Subramanian N, Ramanathan S, Paul SFD, Venkatesan V, Koshy T. A case-control association of RANTES (-28C>G) and CCR5-Delta32 polymorphisms with Parkinson's disease in Indians. *Neurosci Lett.* 2020;739:135404. doi:[10.1016/j.neulet.2020.135404](https://doi.org/10.1016/j.neulet.2020.135404)
205. Cheng L, Chen L, Wei X, Wang Y, Ren Z, Zeng S, Zhang X, Wen H, Gao C, Liu H. NOD2 promotes dopaminergic degeneration regulated by NADPH oxidase 2 in 6-hydroxydopamine model of Parkinson's disease. *J Neuroinflammation.* 2018;15(1):243. doi:[10.1186/s12974-018-1289-z](https://doi.org/10.1186/s12974-018-1289-z)
206. Salehi Z, Rajaei F. Expression of hepatocyte growth factor in the serum and cerebrospinal fluid of patients with Parkinson's disease. *J Clin Neurosci.* 2010;17(12):1553-1556. doi:[10.1016/j.jocn.2010.04.034](https://doi.org/10.1016/j.jocn.2010.04.034)
207. Nemutlu Samur D, Akçay G, Yıldırım S, Özkan A, Çeker T, Derin N, Tanrıöver G, Aslan M, Açar A, Özbey G. Vortioxetine ameliorates motor and cognitive impairments in the rotenone-induced Parkinson's disease via targeting TLR-2 mediated neuroinflammation. *Neuropharmacology.* 2022;208:108977. doi:[10.1016/j.neuropharm.2022.108977](https://doi.org/10.1016/j.neuropharm.2022.108977)
208. Bottero V, Santiago JA, Potashkin JA. PTPRC Expression in Blood is Downregulated in Parkinson's and Progressive Supranuclear Palsy Disorders. *J Parkinsons Dis.* 2018;8(4):529-537. doi:[10.3233/JPD-181391](https://doi.org/10.3233/JPD-181391)
209. Chen MM, Hu ZL, Ding JH, Du RH, Hu G. Astrocytic Kir6.1 deletion aggravates neurodegeneration in the lipopolysaccharide-induced mouse model of Parkinson's disease via astrocyte-neuron cross talk through complement C3-C3R signaling. *Brain Behav Immun.* 2021;95:310-320. doi:[10.1016/j.bbi.2021.04.003](https://doi.org/10.1016/j.bbi.2021.04.003)
210. Lim JL, Ng EY, Lim SY, Tan AH, Abdul-Aziz Z, Ibrahim KA, Gopalai AA, Tay YW, Vijayanathan Y, Toh TS, et al. Association study of MCCC1/LAMP3 and DGKQ variants with Parkinson's disease in patients of Malay ancestry. *Neurol Sci.* 2021;42(10):4203-4207. doi:[10.1007/s10072-021-05056-x](https://doi.org/10.1007/s10072-021-05056-x)
211. Suwelack D, Hurtado-Lorenzo A, Millan E, Gonzalez-Nicolini V, Wawrowsky K, Lowenstein PR, Castro MG. Neuronal expression of the transcription factor Gli1 using the Talpha1 alpha-tubulin promoter is

- neuroprotective in an experimental model of Parkinson's disease. *Gene Ther.* 2004;11(24):1742-1752. doi:[10.1038/sj.gt.3302377](https://doi.org/10.1038/sj.gt.3302377)
212. Haque ME, Azam S, Akther M, Cho DY, Kim IS, Choi DK. The Neuroprotective Effects of GPR4 Inhibition through the Attenuation of Caspase Mediated Apoptotic Cell Death in an MPTP Induced Mouse Model of Parkinson's Disease. *Int J Mol Sci.* 2021;22(9):4674. doi:[10.3390/ijms22094674](https://doi.org/10.3390/ijms22094674)
213. Daniele SG, Béraud D, Davenport C, Cheng K, Yin H, Maguire-Zeiss KA. Activation of MyD88-dependent TLR1/2 signaling by misfolded  $\alpha$ -synuclein, a protein linked to neurodegenerative disorders. *Sci Signal.* 2015;8(376):ra45. doi:[10.1126/scisignal.2005965](https://doi.org/10.1126/scisignal.2005965)
214. Gao JX, Li Y, Wang SN, Chen XC, Lin LL, Zhang H. Overexpression of microRNA-183 promotes apoptosis of substantia nigra neurons via the inhibition of OSMR in a mouse model of Parkinson's disease. *Int J Mol Med.* 2019;43(1):209-220. doi:[10.3892/ijmm.2018.3982](https://doi.org/10.3892/ijmm.2018.3982)
215. Wang Y, Zhang X, Chen F, Chen L, Wang J, Xie J. LRRK2-NFATc2 Pathway Associated with Neuroinflammation May Be a Potential Therapeutic Target for Parkinson's Disease. *J Inflamm Res.* 2021;14:2583-2586. doi:[10.2147/JIR.S301531](https://doi.org/10.2147/JIR.S301531)
216. Moloney EB, Moskites A, Ferrari EJ, Isacson O, Hallett PJ. The glycoprotein GPNMB is selectively elevated in the substantia nigra of Parkinson's disease patients and increases after lysosomal stress. *Neurobiol Dis.* 2018;120:1-11. doi:[10.1016/j.nbd.2018.08.013](https://doi.org/10.1016/j.nbd.2018.08.013)
217. Flores-Soto ME, Corona-Angeles JA, Tejada-Martinez AR, Flores-Guzman PA, Luna-Mujica I, Chaparro-Huerta V, Viveros-Paredes JM.  $\beta$ -Caryophyllene exerts protective antioxidant effects through the activation of NQO1 in the MPTP model of Parkinson's disease. *Neurosci Lett.* 2021;742:135534. doi:[10.1016/j.neulet.2020.135534](https://doi.org/10.1016/j.neulet.2020.135534)
218. Mogi M, Harada M, Kondo T, Riederer P, Nagatsu T. Brain beta 2-microglobulin levels are elevated in the striatum in Parkinson's disease. *J Neural Transm Park Dis Dement Sect.* 1995;9(1):87-92. doi:[10.1007/BF02252965](https://doi.org/10.1007/BF02252965)
219. Seo MH, Lim S, Yeo S. Association of decreased triadin expression level with apoptosis of dopaminergic cells in Parkinson's disease mouse model. *BMC Neurosci.* 2021;22(1):65. doi:[10.1186/s12868-021-00668-7](https://doi.org/10.1186/s12868-021-00668-7)

220. Li J, Chen L, Qin Q, Wang D, Zhao J, Gao H, Yuan X, Zhang J, Zou Y, Mao Z, et al. Upregulated hexokinase 2 expression induces the apoptosis of dopaminergic neurons by promoting lactate production in Parkinson's disease. *Neurobiol Dis.* 2022;163:105605. doi:[10.1016/j.nbd.2021.105605](https://doi.org/10.1016/j.nbd.2021.105605)
221. Hatstat AK, Ahrendt HD, Foster MW, Mayne L, Moseley MA, Englander SW, McCafferty DG. Characterization of Small-Molecule-Induced Changes in Parkinson's-Related Trafficking via the Nedd4 Ubiquitin Signaling Cascade. *Cell Chem Biol.* 2021;28(1):14-25.e9. doi:[10.1016/j.chembiol.2020.10.008](https://doi.org/10.1016/j.chembiol.2020.10.008)
222. García S, López-Hernández L, Dávila-Maldonado L, Cuevas-García C, Gallegos-Arreola M, Alcaraz-Estrada S, Cortes-Espinosa L, Flores C, Canto P, Vázquez R. Association of mitochondrial variants A4336G of the tRNAGln gene and 8701G/A of the MT-ATP6 gene in Mexicans Mestizos with Parkinson disease. *Folia Neuropathol.* 2019;57(4):335-339. doi:[10.5114/fn.2019.89859](https://doi.org/10.5114/fn.2019.89859)
223. Teismann P. COX-2 in the neurodegenerative process of Parkinson's disease. *Biofactors.* 2012;38(6):395-397. doi:[10.1002/biof.1035](https://doi.org/10.1002/biof.1035)
224. Giaime E, Sunyach C, Druon C, Scarzello S, Robert G, Grosso S, Auberger P, Goldberg MS, Shen J, Heutink P, et al. Loss of function of DJ-1 triggered by Parkinson's disease-associated mutation is due to proteolytic resistance to caspase-6. *Cell Death Differ.* 2010;17(1):158-169. doi:[10.1038/cdd.2009.116](https://doi.org/10.1038/cdd.2009.116)
225. Li Q, Zhang P, Cai Y. Genkwain suppresses MPP<sup>+</sup>-induced cytotoxicity by inhibiting TLR4/MyD88/NLRP3 inflammasome pathway in a cellular model of Parkinson's disease. *Neurotoxicology.* 2021;87:62-69. doi:[10.1016/j.neuro.2021.08.018](https://doi.org/10.1016/j.neuro.2021.08.018)
226. Baltus THL, Morelli NR, de Farias CC, Trugilo KP, Okuyama NCM, de Oliveira KB, de Melo LB, Smaili SM, Barbosa DS. Association of -94 ATTG insertion/deletion NFkB1 and c.\*126G>A NFkBIA genetic polymorphisms with oxidative and nitrosative stress biomarkers in Brazilian subjects with Parkinson's Disease. *Neurosci Lett.* 2021;740:135487. doi:[10.1016/j.neulet.2020.135487](https://doi.org/10.1016/j.neulet.2020.135487)
227. Aguirre CA, Concetta Morale M, Peng Q, Sanchez-Alavez M, Cintrón-Colón R, Feng K, Fazelpour S, Maher P, Conti B. Two single nucleotide polymorphisms in IL13 and IL13RA1 from individuals with



- idiopathic Parkinson's disease increase cellular susceptibility to oxidative stress. *Brain Behav Immun.* 2020;88:920-924. doi:[10.1016/j.bbi.2020.04.007](https://doi.org/10.1016/j.bbi.2020.04.007)
228. Zhang Y, Sun HM, He X, Wang YY, Gao YS, Wu HX, Xu H, Gong XG, Guo ZY. Da-Bu-Yin-Wan and Qian-Zheng-San, two traditional Chinese herbal formulas, up-regulate the expression of mitochondrial subunit NADH dehydrogenase 1 synergistically in the mice model of Parkinson's disease. *J Ethnopharmacol.* 2013;146(1):363-371. doi:[10.1016/j.jep.2013.01.005](https://doi.org/10.1016/j.jep.2013.01.005)
229. Dinh E, Rival T, Carrier A, Asfogo N, Corti O, Melon C, Salin P, Lortet S, Kerkerian-Le Goff L. TP53INP1 exerts neuroprotection under ageing and Parkinson's disease-related stress condition. *Cell Death Dis.* 2021;12(5):460. doi:[10.1038/s41419-021-03742-4](https://doi.org/10.1038/s41419-021-03742-4)
230. Chang KH, Wu YR, Chen YC, Wu HC, Chen CM. Association between CSF1 and CSF1R Polymorphisms and Parkinson's Disease in Taiwan. *J Clin Med.* 2019;8(10):1529. doi:[10.3390/jcm8101529](https://doi.org/10.3390/jcm8101529)
231. Fang HS, Wang CC, Chao CY, Fan WL, Su SC, Wu YR. Association of ITPKB, IL1R2 and COQ7 with Parkinson's disease in Taiwan. *J Formos Med Assoc.* 2021;S0929-6646(21)00296-5. doi:[10.1016/j.jfma.2021.06.016](https://doi.org/10.1016/j.jfma.2021.06.016)
232. Darvish H, Azcona LJ, Taghavi S, Firouzabadi SG, Tafakhori A, Alehabib E, Mohajerani F, Zardadi S, Paisán-Ruiz C. ANXA1 with Anti-Inflammatory Properties Might Contribute to Parkinsonism. *Ann Neurol.* 2021;90(2):319-323. doi:[10.1002/ana.26148](https://doi.org/10.1002/ana.26148)
233. Küçükali CI, Salman B, Yüceer H, Ulusoy C, Abacı N, Ekmekci SS, Tüzün E, Bilgiç B, Hanağası HA. Small ubiquitin-related modifier (SUMO) 3 and SUMO4 gene polymorphisms in Parkinson's disease. *Neurol Res.* 2020;42(6):451-457. doi:[10.1080/01616412.2020.1724464](https://doi.org/10.1080/01616412.2020.1724464)
234. Wu HC, Chen CM, Chen YC, Fung HC, Chang KH, Wu YR. DLG2, but not TMEM229B, GPNMB, and ITGA8 polymorphism, is associated with Parkinson's disease in a Taiwanese population. *Neurobiol Aging.* 2018;64:158.e1-158.e6. doi:[10.1016/j.neurobiolaging.2017.11.016](https://doi.org/10.1016/j.neurobiolaging.2017.11.016)
235. Li H, Liu Z, Wu Y, Chen Y, Wang J, Wang Z, Huang D, Wang M, Yu M, Fei J, et al. The deficiency of NRSF/REST enhances the pro-inflammatory function of astrocytes in a model of Parkinson's disease.



- Biochim Biophys Acta Mol Basis Dis. 2020;1866(1):165590.  
doi:[10.1016/j.bbadis.2019.165590](https://doi.org/10.1016/j.bbadis.2019.165590)
236. Wang S, Guan Y, Chen Y, Li X, Zhang C, Yu L, Zhou F, Wang X. Role of Wnt1 and Fzd1 in the spinal cord pathogenesis of amyotrophic lateral sclerosis-transgenic mice. *Biotechnol Lett.* 2013;35(8):1199-1207. doi:[10.1007/s10529-013-1199-1](https://doi.org/10.1007/s10529-013-1199-1)
237. Xu L, Li J, Tian D, Chen L, Tang L, Fan D. The rs696880 Polymorphism in the Nogo-A Receptor Gene (RTN4R) Is Associated With Susceptibility to Sporadic Amyotrophic Lateral Sclerosis in the Chinese Population. *Front Aging Neurosci.* 2018;10:108. doi:[10.3389/fnagi.2018.00108](https://doi.org/10.3389/fnagi.2018.00108)
238. Arosio A, Sala G, Rodriguez-Menendez V, Grana D, Gerardi F, Lunetta C, Ferrarese C, Tremolizzo L. MEF2D and MEF2C pathways disruption in sporadic and familial ALS patients. *Mol Cell Neurosci.* 2016;74:10-17. doi:[10.1016/j.mcn.2016.02.002](https://doi.org/10.1016/j.mcn.2016.02.002)
239. Liu C, Hong K, Chen H, Niu Y, Duan W, Liu Y, Ji Y, Deng B, Li Y, Li Z, et al. Evidence for a protective role of the CX3CL1/CX3CR1 axis in a model of amyotrophic lateral sclerosis. *Biol Chem.* 2019;400(5):651-661. doi:[10.1515/hsz-2018-0204](https://doi.org/10.1515/hsz-2018-0204)
240. Fagiani F, Govoni S, Racchi M, Lanni C. The Peptidyl-prolyl Isomerase Pin1 in Neuronal Signaling: from Neurodevelopment to Neurodegeneration. *Mol Neurobiol.* 2021;58(3):1062-1073. doi:[10.1007/s12035-020-02179-8](https://doi.org/10.1007/s12035-020-02179-8)
241. Tan HHG, Westeneng HJ, van der Burgh HK, van Es MA, Bakker LA, van Veenhuijzen K, van Eijk KR, van Eijk RPA, Veldink JH, van den Berg LH. The Distinct Traits of the UNC13A Polymorphism in Amyotrophic Lateral Sclerosis. *Ann Neurol.* 2020;88(4):796-806. doi:[10.1002/ana.25841](https://doi.org/10.1002/ana.25841)
242. Bajaj NP. Cyclin-dependent kinase-5 (CDK5) and amyotrophic lateral sclerosis. *Amyotroph Lateral Scler Other Motor Neuron Disord.* 2000;1(5):319-327. doi:[10.1080/146608200300079563](https://doi.org/10.1080/146608200300079563)
243. Kurita H, Yabe S, Ueda T, Inden M, Kakita A, Hozumi I. MicroRNA-5572 Is a Novel MicroRNA-Regulating SLC30A3 in Sporadic Amyotrophic Lateral Sclerosis. *Int J Mol Sci.* 2020;21(12):4482. doi:[10.3390/ijms21124482](https://doi.org/10.3390/ijms21124482)

244. Helferich AM, Brockmann SJ, Reinders J, Deshpande D, Holzmann K, Brenner D, Andersen PM, Petri S, Thal DR, Michaelis J, et al. Dysregulation of a novel miR-1825/TBCB/TUBA4A pathway in sporadic and familial ALS. *Cell Mol Life Sci.* 2018;75(23):4301-4319. doi:[10.1007/s00018-018-2873-1](https://doi.org/10.1007/s00018-018-2873-1)
245. Iaccarino C, Mura ME, Esposito S, Carta F, Sanna G, Turrini F, Carrì MT, Crosio C. Bcl2-A1 interacts with pro-caspase-3: implications for amyotrophic lateral sclerosis. *Neurobiol Dis.* 2011;43(3):642-650. doi:[10.1016/j.nbd.2011.05.013](https://doi.org/10.1016/j.nbd.2011.05.013)
246. Vu L, An J, Kovalik T, Gendron T, Petrucelli L, Bowser R. Cross-sectional and longitudinal measures of chitinase proteins in amyotrophic lateral sclerosis and expression of CHI3L1 in activated astrocytes. *J Neurol Neurosurg Psychiatry.* 2020;91(4):350-358. doi:[10.1136/jnnp-2019-321916](https://doi.org/10.1136/jnnp-2019-321916)
247. Ebbert MTW, Ross CA, Pregent LJ, Lank RJ, Zhang C, Katzman RB, Jansen-West K, Song Y, da Rocha EL, Palmucci C, et al. Conserved DNA methylation combined with differential frontal cortex and cerebellar expression distinguishes C9orf72-associated and sporadic ALS, and implicates SERPINA1 in disease. *Acta Neuropathol.* 2017;134(5):715-728. doi:[10.1007/s00401-017-1760-4](https://doi.org/10.1007/s00401-017-1760-4)
248. Wojta KJ, Ayer AH, Ramos EM, Nguyen PD, Karydas AM, Yokoyama JS, Kramer J, Lee SE, Boxer A, Miller BL, et al. Lack of Association Between the CCR5-delta32 Polymorphism and Neurodegenerative Disorders. *Alzheimer Dis Assoc Disord.* 2020;34(3):244-247. doi:[10.1097/WAD.0000000000000367](https://doi.org/10.1097/WAD.0000000000000367)
249. He J, Fu J, Fan D. The complement C7 variant rs3792646 is associated with amyotrophic lateral sclerosis in a Han Chinese population. *Neurobiol Aging.* 2021;99:103.e1-103.e7. doi:[10.1016/j.neurobiolaging.2020.10.012](https://doi.org/10.1016/j.neurobiolaging.2020.10.012)
250. Milani M, Mammarella E, Rossi S, Miele C, Lattante S, Sabatelli M, Cozzolino M, D'Ambrosi N, Apolloni S. Targeting S100A4 with niclosamide attenuates inflammatory and profibrotic pathways in models of amyotrophic lateral sclerosis. *J Neuroinflammation.* 2021;18(1):132. doi:[10.1186/s12974-021-02184-1](https://doi.org/10.1186/s12974-021-02184-1)
251. Grewal RP, Morgan TE, Finch CE. C1qB and clusterin mRNA increase in association with neurodegeneration in sporadic amyotrophic

- lateral sclerosis. *Neurosci Lett.* 1999;271(1):65-67. doi:[10.1016/s0304-3940\(99\)00496-6](https://doi.org/10.1016/s0304-3940(99)00496-6)
252. Yamamoto T, Murayama S, Takao M, Isa T, Higo N. Expression of secreted phosphoprotein 1 (osteopontin) in human sensorimotor cortex and spinal cord: Changes in patients with amyotrophic lateral sclerosis. *Brain Res.* 2017;1655:168-175. doi:[10.1016/j.brainres.2016.10.030](https://doi.org/10.1016/j.brainres.2016.10.030)
253. Lehmann SM, Rosenberger K, Krüger C, Habel P, Derkow K, Kaul D, Rybak A, Brandt C, Schott E, Wulczyn FG, et al. Extracellularly delivered single-stranded viral RNA causes neurodegeneration dependent on TLR7. *J Immunol.* 2012;189(3):1448-1458. doi:[10.4049/jimmunol.1201078](https://doi.org/10.4049/jimmunol.1201078)
254. Liu Y, Hao W, Dawson A, Liu S, Fassbender K. Expression of amyotrophic lateral sclerosis-linked SOD1 mutant increases the neurotoxic potential of microglia via TLR2. *J Biol Chem.* 2009;284(6):3691-3699. doi:[10.1074/jbc.M804446200](https://doi.org/10.1074/jbc.M804446200)
255. Lin F, Lin W, Zhu C, Lin J, Zhu J, Li XY, Wang Z, Wang C, Huang H. Sequencing of neurofilament genes identified NEFH Ser787Arg as a novel risk variant of sporadic amyotrophic lateral sclerosis in Chinese subjects. *BMC Med Genomics.* 2021;14(1):222. doi:[10.1186/s12920-021-01073-z](https://doi.org/10.1186/s12920-021-01073-z)
256. Oeckl P, Weydt P, Thal DR, Weishaupt JH, Ludolph AC, Otto M. Proteomics in cerebrospinal fluid and spinal cord suggests UCHL1, MAP2 and GPNMB as biomarkers and underpins importance of transcriptional pathways in amyotrophic lateral sclerosis. *Acta Neuropathol.* 2020;139(1):119-134. doi:[10.1007/s00401-019-02093-x](https://doi.org/10.1007/s00401-019-02093-x)
257. Staats KA, Schönefeldt S, Van Rillaer M, Van Hoecke A, Van Damme P, Robberecht W, Liston A, Van Den Bosch L. Beta-2 microglobulin is important for disease progression in a murine model for amyotrophic lateral sclerosis. *Front Cell Neurosci.* 2013;7:249. doi:[10.3389/fncel.2013.00249](https://doi.org/10.3389/fncel.2013.00249)
258. Kiaei M, Kipiani K, Petri S, Choi DK, Chen J, Calingasan NY, Beal MF. Integrative role of cPLA with COX-2 and the effect of non-steroidal anti-inflammatory drugs in a transgenic mouse model of amyotrophic lateral sclerosis. *J Neurochem.* 2005;93(2):403-411. doi:[10.1111/j.1471-4159.2005.03024.x](https://doi.org/10.1111/j.1471-4159.2005.03024.x)

259. Liebl MP, Kaya AM, Tenzer S, Mittenzwei R, Koziollek-Drechsler I, Schild H, Moosmann B, Behl C, Clement AM. Dimerization of visinin-like protein 1 is regulated by oxidative stress and calcium and is a pathological hallmark of amyotrophic lateral sclerosis. *Free Radic Biol Med*. 2014;72:41-54. doi:[10.1016/j.freeradbiomed.2014.04.008](https://doi.org/10.1016/j.freeradbiomed.2014.04.008)
260. Kang J, Rivest S. MyD88-deficient bone marrow cells accelerate onset and reduce survival in a mouse model of amyotrophic lateral sclerosis. *J Cell Biol*. 2007;179(6):1219-1230. doi:[10.1083/jcb.200705046](https://doi.org/10.1083/jcb.200705046)
261. Trias E, Kovacs M, King PH, Si Y, Kwon Y, Varela V, Ibarburu S, Moura IC, Hermine O, Beckman JS, et al. Schwann cells orchestrate peripheral nerve inflammation through the expression of CSF1, IL-34, and SCF in amyotrophic lateral sclerosis. *Glia*. 2020;68(6):1165-1181. doi:[10.1002/glia.23768](https://doi.org/10.1002/glia.23768)
262. Van Acker ZP, Declerck K, Luyckx E, Vanden Berghe W, Dewilde S. Non-Methylation-Linked Mechanism of REST-Induced Neuroglobin Expression Impacts Mitochondrial Phenotypes in a Mouse Model of Amyotrophic Lateral Sclerosis. *Neuroscience*. 2019;412:233-247. doi:[10.1016/j.neuroscience.2019.05.039](https://doi.org/10.1016/j.neuroscience.2019.05.039)
263. MacNair L, Xiao S, Miletic D, Ghani M, Julien JP, Keith J, Zinman L, Rogaeva E, Robertson J. MTHFSD and DDX58 are novel RNA-binding proteins abnormally regulated in amyotrophic lateral sclerosis. *Brain*. 2016;139(Pt 1):86-100. doi:[10.1093/brain/awv308](https://doi.org/10.1093/brain/awv308)
264. Lei L, Shen XM, Wang SY, Lu Y, Wang SB, Chen H, Liu Z, Ouyang YS, Duo JY, Da YW, et al. Presence of antibodies against low-density lipoprotein receptor-related protein 4 and impairment of neuromuscular junction in a Chinese cohort of amyotrophic lateral sclerosis. *Chin Med J (Engl)*. 2019;132(12):1487-1489. doi:[10.1097/CM9.0000000000000284](https://doi.org/10.1097/CM9.0000000000000284)
265. Kaiser M, Maletzki I, Hülsmann S, Holtmann B, Schulz-Schaeffer W, Kirchhoff F, Bähr M, Neusch C. Progressive loss of a glial potassium channel (KCNJ10) in the spinal cord of the SOD1 (G93A) transgenic mouse model of amyotrophic lateral sclerosis. *J Neurochem*. 2006;99(3):900-912. doi:[10.1111/j.1471-4159.2006.04131.x](https://doi.org/10.1111/j.1471-4159.2006.04131.x)
266. Cunningham S, O'Doherty C, Patterson C, McDonnell G, Hawkins S, Marrosu MG, Vandenbroeck K. The neuropeptide genes TAC1, TAC3, TAC4, VIP and PACAP(ADCYAP1), and susceptibility to multiple

- sclerosis. *J Neuroimmunol.* 2007;183(1-2):208-213. doi:[10.1016/j.jneuroim.2006.11.002](https://doi.org/10.1016/j.jneuroim.2006.11.002)
267. Bryld E, Zeeberg I, Gjerris A, Werdelin L, Rehfeld JF. Increased cerebrospinal fluid concentrations of C- but not N-terminal cholecystokinin fragments in multiple sclerosis. *Brain Res.* 1987;409(2):364-366. doi:[10.1016/0006-8993\(87\)90723-2](https://doi.org/10.1016/0006-8993(87)90723-2)
268. García-Martín E, Lorenzo-Betancor O, Martínez C, Pastor P, Benito-León J, Millán-Pascual J, Calleja P, Díaz-Sánchez M, Pisa D, Turpín-Fenoll L, et al. LINGO1 rs9652490 and rs11856808 polymorphisms are not associated with risk for multiple sclerosis. *BMC Neurol.* 2013;13:34. doi:[10.1186/1471-2377-13-34](https://doi.org/10.1186/1471-2377-13-34)
269. Blauth K, Zhang X, Chopra M, Rogan S, Markovic-Plese S. The role of fractalkine (CX3CL1) in regulation of CD4(+) cell migration to the central nervous system in patients with relapsing-remitting multiple sclerosis. *Clin Immunol.* 2015;157(2):121-132. doi:[10.1016/j.clim.2015.01.001](https://doi.org/10.1016/j.clim.2015.01.001)
270. Castellanos KJ, Gagyí E, Kormos B, Valyi-Nagy K, Voros A, Shukla D, Horvath S, Slavin KV, Valyi-Nagy T. Increased axonal expression of nectin-1 in multiple sclerosis plaques. *Neurol Sci.* 2013;34(4):465-469. doi:[10.1007/s10072-012-1026-9](https://doi.org/10.1007/s10072-012-1026-9)
271. Donninelli G, Saraf-Sinik I, Mazziotti V, Capone A, Grasso MG, Battistini L, Reynolds R, Magliozzi R, Volpe E. Interleukin-9 regulates macrophage activation in the progressive multiple sclerosis brain. *J Neuroinflammation.* 2020;17(1):149. doi:[10.1186/s12974-020-01770-z](https://doi.org/10.1186/s12974-020-01770-z)
272. Johnson TP, Tyagi R, Patel K, Schiess N, Calabresi PA, Nath A. Impaired toll-like receptor 8 signaling in multiple sclerosis. *J Neuroinflammation.* 2013;10:74. doi:[10.1186/1742-2094-10-74](https://doi.org/10.1186/1742-2094-10-74)
273. van Veen T, Nielsen J, Berkhof J, Barkhof F, Kamphorst W, Bö L, Ravid R, Verweij CL, Huitinga I, Polman CH, et al. CCL5 and CCR5 genotypes modify clinical, radiological and pathological features of multiple sclerosis. *J Neuroimmunol.* 2007;190(1-2):157-164. doi:[10.1016/j.jneuroim.2007.08.005](https://doi.org/10.1016/j.jneuroim.2007.08.005)
274. Fani Maleki A, Cisbani G, Laflamme N, Prefontaine P, Plante MM, Baillargeon J, Rangachari M, Gosselin J, Rivest S. Selective Immunomodulatory and Neuroprotective Effects of a NOD2 Receptor

- Agonist on Mouse Models of Multiple Sclerosis. *Neurotherapeutics*. 2021;18(2):889-904. doi:[10.1007/s13311-020-00998-0](https://doi.org/10.1007/s13311-020-00998-0)
275. Chataway J, Sawcer S, Sherman D, Hobart M, Fernie B, Coraddu F, Feakes R, Broadley S, Gray J, Jones HB, et al. No evidence for association of multiple sclerosis with the complement factors C6 and C7. *J Neuroimmunol*. 1999;99(1):150-156. doi:[10.1016/s0165-5728\(99\)00054-5](https://doi.org/10.1016/s0165-5728(99)00054-5)
276. Trend S, Leffler J, Cooper MN, Byrne SN, Kermode AG, French MA, Hart PH. Narrowband UVB phototherapy reduces TNF production by B-cell subsets stimulated via TLR7 from individuals with early multiple sclerosis. *Clin Transl Immunology*. 2020;9(10):e1197. doi:[10.1002/cti2.1197](https://doi.org/10.1002/cti2.1197)
277. Moghadam S, Erfanmanesh M, Esmailzadeh A. Interleukin 35 and Hepatocyte Growth Factor; as a novel combined immune gene therapy for Multiple Sclerosis disease. *Med Hypotheses*. 2017;109:102-105. doi:[10.1016/j.mehy.2017.09.017](https://doi.org/10.1016/j.mehy.2017.09.017)
278. Wasko NJ, Nichols F, Clark RB. Multiple sclerosis, the microbiome, TLR2, and the hygiene hypothesis. *Autoimmun Rev*. 2020;19(1):102430. doi:[10.1016/j.autrev.2019.102430](https://doi.org/10.1016/j.autrev.2019.102430)
279. Szvetko AL, Jones A, Mackenzie J, Tajouri L, Csurhes PA, Greer JM, Pender MP, Griffiths LR. An investigation of the C77G and C772T variations within the human protein tyrosine phosphatase receptor type C gene for association with multiple sclerosis in an Australian population. *Brain Res*. 2009;1255:148-152. doi:[10.1016/j.brainres.2008.12.017](https://doi.org/10.1016/j.brainres.2008.12.017)
280. Bourel J, Planche V, Dubourdieu N, Oliveira A, Séré A, Ducourneau EG, Tible M, Maitre M, Lesté-Lasserre T, Nadjar A, et al. Complement C3 mediates early hippocampal neurodegeneration and memory impairment in experimental multiple sclerosis. *Neurobiol Dis*. 2021;160:105533. doi:[10.1016/j.nbd.2021.105533](https://doi.org/10.1016/j.nbd.2021.105533)
281. Guerini FR, Clerici M, Cagliani R, Malhotra S, Montalban X, Forni D, Agliardi C, Riva S, Caputo D, Galimberti D, et al. No association of IFI16 (interferon-inducible protein 16) variants with susceptibility to multiple sclerosis. *J Neuroimmunol*. 2014;271(1-2):49-52. doi:[10.1016/j.jneuroim.2014.04.006](https://doi.org/10.1016/j.jneuroim.2014.04.006)
282. Wang Y, Imitola J, Rasmussen S, O'Connor KC, Khoury SJ. Paradoxical dysregulation of the neural stem cell pathway sonic hedgehog-



- Gli1 in autoimmune encephalomyelitis and multiple sclerosis. *Ann Neurol.* 2008;64(4):417-427. doi:[10.1002/ana.21457](https://doi.org/10.1002/ana.21457)
283. Cardamone G, Paraboschi EM, Soldà G, Duga S, Saarela J, Asselta R. Genetic Association and Altered Gene Expression of CYBB in Multiple Sclerosis Patients. *Biomedicines.* 2018;6(4):117. doi:[10.3390/biomedicines6040117](https://doi.org/10.3390/biomedicines6040117)
284. Enevold C, Oturai AB, Sørensen PS, Ryder LP, Koch-Henriksen N, Bendtzen K. Multiple sclerosis and polymorphisms of innate pattern recognition receptors TLR1-10, NOD1-2, DDX58, and IFIH1. *J Neuroimmunol.* 2009;212(1-2):125-131. doi:[10.1016/j.jneuroim.2009.04.008](https://doi.org/10.1016/j.jneuroim.2009.04.008)
285. Håkansson I, Tisell A, Cassel P, Blennow K, Zetterberg H, Lundberg P, Dahle C, Vrethem M, Ernerudh J. Neurofilament levels, disease activity and brain volume during follow-up in multiple sclerosis. *J Neuroinflammation.* 2018;15(1):209. doi:[10.1186/s12974-018-1249-7](https://doi.org/10.1186/s12974-018-1249-7)
286. Carlini V, Verduci I, Cianci F, Cannavale G, Fenoglio C, Galimberti D, Mazzanti M. CLIC1 Protein Accumulates in Circulating Monocyte Membrane during Neurodegeneration. *Int J Mol Sci.* 2020;21(4):1484. doi:[10.3390/ijms21041484](https://doi.org/10.3390/ijms21041484)
287. Ghareghani M, Scavo L, Jand Y, Farhadi N, Sadeghi H, Ghanbari A, Mondello S, Arnoult D, Gharaghani S, Zibara K. Melatonin Therapy Modulates Cerebral Metabolism and Enhances Remyelination by Increasing PDK4 in a Mouse Model of Multiple Sclerosis. *Front Pharmacol.* 2019;10:147. doi:[10.3389/fphar.2019.00147](https://doi.org/10.3389/fphar.2019.00147)
288. Imani SZH, Hojati Z, Khalilian S, Dehghanian F, Kheirollahi M, Khorrami M, Shaygannejad V, Mirmosayyeb O. Expression and clinical significance of IL7R, NFATc2, and RNF213 in familial and sporadic multiple sclerosis. *Sci Rep.* 2021;11(1):19260. doi:[10.1038/s41598-021-98691-5](https://doi.org/10.1038/s41598-021-98691-5)
289. Budge KM, Neal ML, Richardson JR, Safadi FF. Glycoprotein NMB: an Emerging Role in Neurodegenerative Disease. *Mol Neurobiol.* 2018;55(6):5167-5176. doi:[10.1007/s12035-017-0707-z](https://doi.org/10.1007/s12035-017-0707-z)
290. Hecker M, Boxberger N, Illner N, Fitzner B, Schröder I, Winkelmann A, Dudesek A, Meister S, Koczan D, Lorenz P, et al. A genetic variant associated with multiple sclerosis inversely affects the expression of CD58

- and microRNA-548ac from the same gene. *PLoS Genet.* 2019;15(2):e1007961. doi:[10.1371/journal.pgen.1007961](https://doi.org/10.1371/journal.pgen.1007961)
291. Alexoudi A, Zachaki S, Stavropoulou C, Gavrili S, Spiliopoulou C, Papadodima S, Karageorgiou CE, Sambani C. Possible Implication of GSTP1 and NQO1 Polymorphisms on Natalizumab Response in Multiple Sclerosis. *Ann Clin Lab Sci.* 2016;46(6):586-591.
292. Denic A, Pirko I, Wootla B, Bieber A, Macura S, Rodriguez M. Deletion of beta-2-microglobulin ameliorates spinal cord lesion load and promotes recovery of brainstem NAA levels in a murine model of multiple sclerosis. *Brain Pathol.* 2012;22(5):698-708. doi:[10.1111/j.1750-3639.2012.00576.x](https://doi.org/10.1111/j.1750-3639.2012.00576.x)
293. Iparraguirre L, Muñoz-Culla M, Prada-Luengo I, Castillo-Triviño T, Olascoaga J, Otaegui D. Circular RNA profiling reveals that circular RNAs from ANXA2 can be used as new biomarkers for multiple sclerosis. *Hum Mol Genet.* 2017;26(18):3564-3572. doi:[10.1093/hmg/ddx243](https://doi.org/10.1093/hmg/ddx243)
294. Azimi G, Ranjbaran F, Arsang-Jang S, Ghafouri-Fard S, Mazdeh M, Sayad A, Taheri M. Upregulation of VEGF-A and correlation between VEGF-A and FLT-1 expressions in Iranian multiple sclerosis patients. *Neurol Sci.* 2020;41(6):1459-1465. doi:[10.1007/s10072-019-04234-2](https://doi.org/10.1007/s10072-019-04234-2)
295. Bergamaschi L, Ban M, Leone MA, Sawcer SJ, D'Alfonso S. No evidence of association of the rare nsSNP rs35667974 in IFIH1 with multiple sclerosis. *J Neuroimmunol.* 2010;221(1-2):112-114. doi:[10.1016/j.jneuroim.2010.01.005](https://doi.org/10.1016/j.jneuroim.2010.01.005)
296. Carlson NG, Hill KE, Tsunoda I, Fujinami RS, Rose JW. The pathologic role for COX-2 in apoptotic oligodendrocytes in virus induced demyelinating disease: implications for multiple sclerosis. *J Neuroimmunol.* 2006;174(1-2):21-31. doi:[10.1016/j.jneuroim.2006.01.008](https://doi.org/10.1016/j.jneuroim.2006.01.008)
297. Torkamandi S, Bahrami S, Ghorashi T, Dehani M, Bayat H, Hoseini SM, Rezaei S, Soosanabadi M. Dysregulation of long noncoding RNA MEG3 and NLRC5 expressions in patients with relapsing-remitting multiple sclerosis: is there any correlation?. *Genes Immun.* 2021;22(7-8):322-326. doi:[10.1038/s41435-021-00154-4](https://doi.org/10.1038/s41435-021-00154-4)
298. Abdel Rasol HA, Helmy H, Aziz MA. Serum complement factor H and Tyr402 His gene polymorphism among Egyptians with multiple

- sclerosis. *Neurol Res.* 2015;37(10):845-852.  
doi:[10.1179/1743132815Y.0000000075](https://doi.org/10.1179/1743132815Y.0000000075)
299. Khalilian S, Hojati Z, Dehghanian F, Shaygannejad V, Imani SZH, Kheirollahi M, Khorrani M, Mirmosayyeb O. Gene expression profiles of YAP1, TAZ, CRB3, and VDR in familial and sporadic multiple sclerosis among an Iranian population. *Sci Rep.* 2021;11(1):7713. doi:[10.1038/s41598-021-87131-z](https://doi.org/10.1038/s41598-021-87131-z)
300. Zheng C, Chen J, Chu F, Zhu J, Jin T. Inflammatory Role of TLR-MyD88 Signaling in Multiple Sclerosis. *Front Mol Neurosci.* 2020;12:314. doi:[10.3389/fnmol.2019.00314](https://doi.org/10.3389/fnmol.2019.00314)
301. Keshari PK, Harbo HF, Myhr KM, Aarseth JH, Bos SD, Berge T. Allelic imbalance of multiple sclerosis susceptibility genes IKZF3 and IQGAP1 in human peripheral blood. *BMC Genet.* 2016;17:59. doi:[10.1186/s12863-016-0367-4](https://doi.org/10.1186/s12863-016-0367-4)
302. Colamatteo A, Maggioli E, Azevedo Loiola R, Hamid Sheikh M, Cali G, Bruzzese D, Maniscalco GT, Centonze D, Buttari F, Lanzillo R, et al. Reduced Annexin A1 Expression Associates with Disease Severity and Inflammation in Multiple Sclerosis Patients. *J Immunol.* 2019;203(7):1753-1765. doi:[10.4049/jimmunol.1801683](https://doi.org/10.4049/jimmunol.1801683)
303. Enevold C, Oturai AB, Sørensen PS, Ryder LP, Koch-Henriksen N, Bendtzen K. Multiple sclerosis and polymorphisms of innate pattern recognition receptors TLR1-10, NOD1-2, DDX58, and IFIH1. *J Neuroimmunol.* 2009;212(1-2):125-131. doi:[10.1016/j.jneuroim.2009.04.008](https://doi.org/10.1016/j.jneuroim.2009.04.008)
304. Satoh J, Yamamoto Y, Asahina N, Kitano S, Kino Y. RNA-Seq data mining: downregulation of NeuroD6 serves as a possible biomarker for alzheimer's disease brains. *Dis Markers.* 2014;2014:123165. doi:[10.1155/2014/123165](https://doi.org/10.1155/2014/123165)
305. Russo P, Kisialiou A, Moroni R, Prinzi G, Fini M. Effect of Genetic Polymorphisms (SNPs) in CHRNA7 Gene on Response to Acetylcholinesterase Inhibitors (AChEI) in Patients with Alzheimer's Disease. *Curr Drug Targets.* 2017;18(10):1179-1190. doi:[10.2174/1389450116666151001111826](https://doi.org/10.2174/1389450116666151001111826)
306. Sun X, Wang Q, Blennow K, Zetterberg H, McCarthy M, Loewenstein DA, Vontell R, Yue Z, Zhang B. Association of neurogranin

- gene expression with Alzheimer's disease pathology in the perirhinal cortex. *Alzheimers Dement (N Y)*. 2021;7(1):e12162. doi:[10.1002/trc2.12162](https://doi.org/10.1002/trc2.12162)
307. Plagman A, Hoscheidt S, McLimans KE, Klinedinst B, Pappas C, Anantharam V, Kanthasamy A, Willette AA. Cholecystokinin and Alzheimer's disease: a biomarker of metabolic function, neural integrity, and cognitive performance. *Neurobiol Aging*. 2019;76:201-207. doi:[10.1016/j.neurobiolaging.2019.01.002](https://doi.org/10.1016/j.neurobiolaging.2019.01.002)
308. Emilsson L, Saetre P, Jazin E. Low mRNA levels of RGS4 splice variants in Alzheimer's disease: association between a rare haplotype and decreased mRNA expression. *Synapse*. 2006;59(3):173-176. doi:[10.1002/syn.20226](https://doi.org/10.1002/syn.20226)
309. Paracchini L, Beltrame L, Boeri L, Fusco F, Caffarra P, Marchini S, Albani D, Forloni G. Exome sequencing in an Italian family with Alzheimer's disease points to a role for seizure-related gene 6 (SEZ6) rare variant R615H. *Alzheimers Res Ther*. 2018;10(1):106. doi:[10.1186/s13195-018-0435-2](https://doi.org/10.1186/s13195-018-0435-2)
310. Lee JS, Lee Y, André EA, Lee KJ, Nguyen T, Feng Y, Jia N, Harris BT, Burns MP, Pak DTS. Inhibition of Polo-like kinase 2 ameliorates pathogenesis in Alzheimer's disease model mice. *PLoS One*. 2019;14(7):e0219691. doi:[10.1371/journal.pone.0219691](https://doi.org/10.1371/journal.pone.0219691)
311. Fernandez-Enright F, Andrews JL. Lingo-1: a novel target in therapy for Alzheimer's disease?. *Neural Regen Res*. 2016;11(1):88-89. doi:[10.4103/1673-5374.175048](https://doi.org/10.4103/1673-5374.175048)
312. Piras IS, Krate J, Delvaux E, Nolz J, De Both MD, Mastroeni DF, Serrano GE, Sue LI, Beach TG, Coleman PD, et al. Association of AEBP1 and NRN1 RNA expression with Alzheimer's disease and neurofibrillary tangle density in middle temporal gyrus. *Brain Res*. 2019;1719:217-224. doi:[10.1016/j.brainres.2019.06.004](https://doi.org/10.1016/j.brainres.2019.06.004)
313. Fan Q, He W, Gayen M, Benoit MR, Luo X, Hu X, Yan R. Activated CX3CL1/Smad2 Signals Prevent Neuronal Loss and Alzheimer's Tau Pathology-Mediated Cognitive Dysfunction. *J Neurosci*. 2020;40(5):1133-1144. doi:[10.1523/JNEUROSCI.1333-19.2019](https://doi.org/10.1523/JNEUROSCI.1333-19.2019)
314. van Abel D, Michel O, Veerhuis R, Jacobs M, van Dijk M, Oudejans CB. Direct downregulation of CNTNAP2 by STOX1A is associated with

- Alzheimer's disease. *J Alzheimers Dis.* 2012;31(4):793-800. doi:[10.3233/JAD-2012-120472](https://doi.org/10.3233/JAD-2012-120472)
315. Ibarreta D, Tao J, Parrilla R, Ayuso MS. Mutation analysis of chromosome 19 calmodulin (CALM3) gene in Alzheimer's disease patients. *Neurosci Lett.* 1997;229(3):157-160. doi:[10.1016/s0304-3940\(97\)00453-9](https://doi.org/10.1016/s0304-3940(97)00453-9)
316. Wang L, Zhou Y, Chen D, Lee TH. Peptidyl-Prolyl Cis/Trans Isomerase Pin1 and Alzheimer's Disease. *Front Cell Dev Biol.* 2020;8:355. doi:[10.3389/fcell.2020.00355](https://doi.org/10.3389/fcell.2020.00355)
317. Davidsson P, Bogdanovic N, Lannfelt L, Blennow K. Reduced expression of amyloid precursor protein, presenilin-1 and rab3a in cortical brain regions in Alzheimer's disease. *Dement Geriatr Cogn Disord.* 2001;12(4):243-250. doi:[10.1159/000051266](https://doi.org/10.1159/000051266)
318. Cook LJ, Ho LW, Taylor AE, Brayne C, Evans JG, Xuereb J, Cairns NJ, Pritchard A, Lemmon H, Mann D, et al. Candidate gene association studies of the alpha 4 (CHRNA4) and beta 2 (CHRNA2) neuronal nicotinic acetylcholine receptor subunit genes in Alzheimer's disease. *Neurosci Lett.* 2004;358(2):142-146. doi:[10.1016/j.neulet.2004.01.016](https://doi.org/10.1016/j.neulet.2004.01.016)
319. Nikhil K, Viccaro K, Shah K. Multifaceted Regulation of ALDH1A1 by Cdk5 in Alzheimer's Disease Pathogenesis. *Mol Neurobiol.* 2019;56(2):1366-1390. doi:[10.1007/s12035-018-1114-9](https://doi.org/10.1007/s12035-018-1114-9)
320. Tan MG, Lee C, Lee JH, Francis PT, Williams RJ, Ramírez MJ, Chen CP, Wong PT, Lai MK. Decreased rabphilin 3A immunoreactivity in Alzheimer's disease is associated with A $\beta$  burden. *Neurochem Int.* 2014;64:29-36. doi:[10.1016/j.neuint.2013.10.013](https://doi.org/10.1016/j.neuint.2013.10.013)
321. Libiger O, Shaw LM, Watson MH, Nairn AC, Umaña KL, Biarnes MC, Canet-Avilés RM, Jack CR Jr, Breton YA, Cortes L, et al. Longitudinal CSF proteomics identifies NPTX2 as a prognostic biomarker of Alzheimer's disease. *Alzheimers Dement.* 2021;17(12):1976-1987. doi:[10.1002/alz.12353](https://doi.org/10.1002/alz.12353)
322. Dulewicz M, Kulczyńska-Przybik A, Słowik A, Borawska R, Mroczko B. Neurogranin and Neuronal Pentraxin Receptor as Synaptic Dysfunction Biomarkers in Alzheimer's Disease. *J Clin Med.* 2021;10(19):4575. doi:[10.3390/jcm10194575](https://doi.org/10.3390/jcm10194575)
323. Paracchini L, Beltrame L, Boeri L, Fusco F, Caffarra P, Marchini S, Albani D, Forloni G. Exome sequencing in an Italian family with

Alzheimer's disease points to a role for seizure-related gene 6 (SEZ6) rare variant R615H. *Alzheimers Res Ther.* 2018;10(1):106. doi:[10.1186/s13195-018-0435-2](https://doi.org/10.1186/s13195-018-0435-2)

324. Gaff J, Jackaman C, Papadimitriou J, Waters S, McLean C, Price P. Immunohistochemical evidence of P2X7R, P2X4R and CaMKK2 in pyramidal neurons of frontal cortex does not align with Alzheimer's disease. *Exp Mol Pathol.* 2021;120:104636. doi:[10.1016/j.yexmp.2021.104636](https://doi.org/10.1016/j.yexmp.2021.104636)
325. Liu SJ, Yang C, Zhang Y, Su RY, Chen JL, Jiao MM, Chen HF, Zheng N, Luo S, et al. Neuroprotective effect of  $\beta$ -asarone against Alzheimer's disease: regulation of synaptic plasticity by increased expression of SYP and GluR1. *Drug Des Devel Ther.* 2016;10:1461-1469. doi:[10.2147/DDDT.S93559](https://doi.org/10.2147/DDDT.S93559)
326. Kong Y, Zhang S, Huang L, Zhang C, Xie F, Zhang Z, Huang Q, Jiang D, Li J, Zhou W, et al. Positron Emission Computed Tomography Imaging of Synaptic Vesicle Glycoprotein 2A in Alzheimer's Disease. *Front Aging Neurosci.* 2021;13:731114. doi:[10.3389/fnagi.2021.731114](https://doi.org/10.3389/fnagi.2021.731114)
327. Liu FF, Zhang Z, Chen W, Gu HY, Yan QJ. Regulatory mechanism of microRNA-377 on CDH13 expression in the cell model of Alzheimer's disease. *Eur Rev Med Pharmacol Sci.* 2018;22(9):2801-2808. doi:[10.26355/eurrev\\_201805\\_14979](https://doi.org/10.26355/eurrev_201805_14979)
328. van Abel D, Michel O, Veerhuis R, Jacobs M, van Dijk M, Oudejans CB. Direct downregulation of CNTNAP2 by STOX1A is associated with Alzheimer's disease. *J Alzheimers Dis.* 2012;31(4):793-800. doi:[10.3233/JAD-2012-120472](https://doi.org/10.3233/JAD-2012-120472)
329. Ibarreta D, Tao J, Parrilla R, Ayuso MS. Mutation analysis of chromosome 19 calmodulin (CALM3) gene in Alzheimer's disease patients. *Neurosci Lett.* 1997;229(3):157-160. doi:[10.1016/s0304-3940\(97\)00453-9](https://doi.org/10.1016/s0304-3940(97)00453-9)
330. Popova SN, Alafuzoff I. Distribution of SLC10A4, a synaptic vesicle protein in the human brain, and the association of this protein with Alzheimer's disease-related neuronal degeneration. *J Alzheimers Dis.* 2013;37(3):603-610. doi:[10.3233/JAD-130548](https://doi.org/10.3233/JAD-130548)
331. Mody N, Agouni A, McIlroy GD, Platt B, Delibegovic M. Susceptibility to diet-induced obesity and glucose intolerance in the APP (SWE)/PSEN1 (A246E) mouse model of Alzheimer's disease is associated with increased brain levels of protein tyrosine phosphatase 1B (PTP1B) and



- retinol-binding protein 4 (RBP4), and basal phosphorylation of S6 ribosomal protein. *Diabetologia*. 2011;54(8):2143-2151. doi:[10.1007/s00125-011-2160-2](https://doi.org/10.1007/s00125-011-2160-2)
332. Ashraf A, Ashton NJ, Chatterjee P, Goozee K, Shen K, Fripp J, Ames D, Rowe C, Masters CL, Villemagne V, et al. Plasma transferrin and hemopexin are associated with altered A $\beta$  uptake and cognitive decline in Alzheimer's disease pathology. *Alzheimers Res Ther*. 2020;12(1):72. doi:[10.1186/s13195-020-00634-1](https://doi.org/10.1186/s13195-020-00634-1)
333. Koppel J, Campagne F, Vingtdeux V, Dreses-Werringloer U, Ewers M, Rujescu D, Hampel H, Gordon ML, Christen E, Chapuis J, et al. CALHM1 P86L polymorphism modulates CSF A $\beta$  levels in cognitively healthy individuals at risk for Alzheimer's disease. *Mol Med*. 2011;17(9-10):974-979. doi:[10.2119/molmed.2011.00154](https://doi.org/10.2119/molmed.2011.00154)
334. Sanfilippo C, Musumeci G, Kazakova M, Mazzone V, Castrogiovanni P, Imbesi R, Di Rosa M. GNG13 Is a Potential Marker of the State of Health of Alzheimer's Disease Patients' Cerebellum. *J Mol Neurosci*. 2021;71(5):1046-1060. doi:[10.1007/s12031-020-01726-1](https://doi.org/10.1007/s12031-020-01726-1)
335. Lananna BV, McKee CA, King MW, Del-Aguila JL, Dimitry JM, Farias FHG, Nadarajah CJ, Xiong DD, Guo C, Cammack AJ, et al. Chi311/YKL-40 is controlled by the astrocyte circadian clock and regulates neuroinflammation and Alzheimer's disease pathogenesis. *Sci Transl Med*. 2020;12(574):eaax3519. doi:[10.1126/scitranslmed.aax3519](https://doi.org/10.1126/scitranslmed.aax3519)
336. Wang P, Li XL, Cao ZH. STC1 ameliorates cognitive impairment and neuroinflammation of Alzheimer's disease mice via inhibition of ERK1/2 pathway. *Immunobiology*. 2021;226(3):152092. doi:[10.1016/j.imbio.2021.152092](https://doi.org/10.1016/j.imbio.2021.152092)
337. Trojan E, Tylek K, Schröder N, Kahl I, Brandenburg LO, Mastromarino M, Leopoldo M, Basta-Kaim A, Lacivita E. The N-Formyl Peptide Receptor 2 (FPR2) Agonist MR-39 Improves Ex Vivo and In Vivo Amyloid Beta (1-42)-Induced Neuroinflammation in Mouse Models of Alzheimer's Disease. *Mol Neurobiol*. 2021;58(12):6203-6221. doi:[10.1007/s12035-021-02543-2](https://doi.org/10.1007/s12035-021-02543-2)
338. Leri M, Chaudhary H, Iashchishyn IA, Pansieri J, Svedružić ŽM, Gómez Alcalde S, Musteikyte G, Smirnovas V, Stefani M, Bucciantini M, et al. Natural Compound from Olive Oil Inhibits S100A9 Amyloid Formation

- and Cytotoxicity: Implications for Preventing Alzheimer's Disease. *ACS Chem Neurosci.* 2021;12(11):1905-1918. doi:[10.1021/acschemneuro.0c00828](https://doi.org/10.1021/acschemneuro.0c00828)
339. Li T, Zhu J. Entanglement of CCR5 and Alzheimer's Disease. *Front Aging Neurosci.* 2019;11:209. doi:[10.3389/fnagi.2019.00209](https://doi.org/10.3389/fnagi.2019.00209)
340. Zhang DF, Fan Y, Xu M, Wang G, Wang D, Li J, Kong LL, Zhou H, Luo R, Bi R, et al. Complement C7 is a novel risk gene for Alzheimer's disease in Han Chinese. *Natl Sci Rev.* 2019;6(2):257-274. doi:[10.1093/nsr/nwy127](https://doi.org/10.1093/nsr/nwy127)
341. Hilgeroth A, Tell V, Kramer S, Totzke F, Schachtele C. Approaches to a multitargeting drug development: first profiled 3-ethoxycarbonyl-1-aza-9-oxafluorenes representing a perspective compound class targeting Alzheimer disease relevant kinases CDK1, CDK5 and GSK-3 $\beta$ . *Med Chem.* 2014;10(1):90-97. doi:[10.2174/157340641001131226141606](https://doi.org/10.2174/157340641001131226141606)
342. Zhao LJ, Wang ZT, Ma YH, Zhang W, Dong Q, Yu JT, Tan L. Associations of the cerebrospinal fluid hepatocyte growth factor with Alzheimer's disease pathology and cognitive function. *BMC Neurol.* 2021;21(1):387. doi:[10.1186/s12883-021-02356-9](https://doi.org/10.1186/s12883-021-02356-9)
343. Herrera-Rivero M, Santarelli F, Brosseron F, Kummer MP, Heneka MT. Dysregulation of TLR5 and TAM Ligands in the Alzheimer's Brain as Contributors to Disease Progression. *Mol Neurobiol.* 2019;56(9):6539-6550. doi:[10.1007/s12035-019-1540-3](https://doi.org/10.1007/s12035-019-1540-3)
344. Piazza F, Galimberti G, Conti E, Isella V, Perlangeli MV, Speranza T, Borroni B, Pogliani EM, Padovani A, Ferrarese C. Increased tissue factor pathway inhibitor and homocysteine in Alzheimer's disease. *Neurobiol Aging.* 2012;33(2):226-233. doi:[10.1016/j.neurobiolaging.2010.02.016](https://doi.org/10.1016/j.neurobiolaging.2010.02.016)
345. Zhang W, Wang LZ, Yu JT, Chi ZF, Tan L. Increased expressions of TLR2 and TLR4 on peripheral blood mononuclear cells from patients with Alzheimer's disease. *J Neurol Sci.* 2012;315(1-2):67-71. doi:[10.1016/j.jns.2011.11.032](https://doi.org/10.1016/j.jns.2011.11.032)
346. Rasmussen KL, Nordestgaard BG, Frikke-Schmidt R, Nielsen SF. An updated Alzheimer hypothesis: Complement C3 and risk of Alzheimer's disease-A cohort study of 95,442 individuals. *Alzheimers Dement.* 2018;14(12):1589-1601. doi:[10.1016/j.jalz.2018.07.223](https://doi.org/10.1016/j.jalz.2018.07.223)

347. Lashkari K, Teague G, Chen H, Lin YQ, Kumar S, McLaughlin MM, López FJ. A monoclonal antibody targeting amyloid  $\beta$  ( $A\beta$ ) restores complement factor I bioactivity: Potential implications in age-related macular degeneration and Alzheimer's disease. *PLoS One*. 2018;13(5):e0195751. doi:[10.1371/journal.pone.0195751](https://doi.org/10.1371/journal.pone.0195751)
348. Manev H, Manev R. 5-Lipoxygenase (ALOX5) and FLAP (ALOX5AP) gene polymorphisms as factors in vascular pathology and Alzheimer's disease. *Med Hypotheses*. 2006;66(3):501-503. doi:[10.1016/j.mehy.2005.09.031](https://doi.org/10.1016/j.mehy.2005.09.031)
349. Corsi MM, Licastro F, Porcellini E, Dogliotti G, Galliera E, Lamont JL, Innocenzi PJ, Fitzgerald SP. Reduced plasma levels of P-selectin and L-selectin in a pilot study from Alzheimer disease: relationship with neurodegeneration. *Biogerontology*. 2011;12(5):451-454. doi:[10.1007/s10522-011-9335-6](https://doi.org/10.1007/s10522-011-9335-6)
350. Aminyavari S, Zahmatkesh M, Khodagholi F, Sanati M. Anxiolytic impact of Apelin-13 in a rat model of Alzheimer's disease: Involvement of glucocorticoid receptor and FKBP5. *Peptides*. 2019;118:170102. doi:[10.1016/j.peptides.2019.170102](https://doi.org/10.1016/j.peptides.2019.170102)
351. Kajiwara Y, McKenzie A, Dorr N, Gama Sosa MA, Elder G, Schmeidler J, Dickstein DL, Bozdagi O, Zhang B, Buxbaum JD. The human-specific CASP4 gene product contributes to Alzheimer-related synaptic and behavioural deficits. *Hum Mol Genet*. 2016;25(19):4315-4327. doi:[10.1093/hmg/ddw265](https://doi.org/10.1093/hmg/ddw265)
352. Schweig JE, Yao H, Beaulieu-Abdelahad D, Ait-Ghezala G, Mouzon B, Crawford F, Mullan M, Paris D. Alzheimer's disease pathological lesions activate the spleen tyrosine kinase. *Acta Neuropathol Commun*. 2017;5(1):69. doi:[10.1186/s40478-017-0472-2](https://doi.org/10.1186/s40478-017-0472-2)
353. Larrick JW, Mendelsohn AR. Modulation of cGAS-STING Pathway by Nicotinamide Riboside in Alzheimer's Disease. *Rejuvenation Res*. 2021;24(5):397-402. doi:[10.1089/rej.2021.0062](https://doi.org/10.1089/rej.2021.0062)
354. Yamamoto A, Suzuki T, Sakaki Y. Isolation of hNap1BP which interacts with human Nap1 (NCKAP1) whose expression is down-regulated in Alzheimer's disease. *Gene*. 2001;271(2):159-169. doi:[10.1016/s0378-1119\(01\)00521-2](https://doi.org/10.1016/s0378-1119(01)00521-2)

355. Manocha GD, Ghatak A, Puig KL, Kraner SD, Norris CM, Combs CK. NFATc2 Modulates Microglial Activation in the A $\beta$ PP/PS1 Mouse Model of Alzheimer's Disease. *J Alzheimers Dis.* 2017;58(3):775-787. doi:[10.3233/JAD-151203](https://doi.org/10.3233/JAD-151203)
356. Bigalke B, Schreitmüller B, Sopova K, Paul A, Stransky E, Gawaz M, Stellos K, Laske C. Adipocytokines and CD34 progenitor cells in Alzheimer's disease. *PLoS One.* 2011;6(5):e20286. doi:[10.1371/journal.pone.0020286](https://doi.org/10.1371/journal.pone.0020286)
357. Aichholzer F, Klafki HW, Ogorek I, Vogelgsang J, Wiltfang J, Scherbaum N, Weggen S, Wirths O. Evaluation of cerebrospinal fluid glycoprotein NMB (GPNMB) as a potential biomarker for Alzheimer's disease. *Alzheimers Res Ther.* 2021;13(1):94. doi:[10.1186/s13195-021-00828-1](https://doi.org/10.1186/s13195-021-00828-1)
358. Baumann K, Mandelkow EM, Biernat J, Piwnicka-Worms H, Mandelkow E. Abnormal Alzheimer-like phosphorylation of tau-protein by cyclin-dependent kinases cdk2 and cdk5. *FEBS Lett.* 1993;336(3):417-424. doi:[10.1016/0014-5793\(93\)80849-p](https://doi.org/10.1016/0014-5793(93)80849-p)
359. Burgaletto C, Platania CBM, Di Benedetto G, Munafò A, Giurdanella G, Federico C, Caltabiano R, Saccone S, Conti F, Bernardini R, et al. Targeting the miRNA-155/TNFSF10 network restrains inflammatory response in the retina in a mouse model of Alzheimer's disease. *Cell Death Dis.* 2021;12(10):905. doi:[10.1038/s41419-021-04165-x](https://doi.org/10.1038/s41419-021-04165-x)
360. Keaney J, Gasser J, Gillet G, Scholz D, Kadiu I. Inhibition of Bruton's Tyrosine Kinase Modulates Microglial Phagocytosis: Therapeutic Implications for Alzheimer's Disease. *J Neuroimmune Pharmacol.* 2019;14(3):448-461. doi:[10.1007/s11481-019-09839-0](https://doi.org/10.1007/s11481-019-09839-0)
361. Chhetri J, King AE, Gueven N. Alzheimer's Disease and NQO1: Is there a Link?. *Curr Alzheimer Res.* 2018;15(1):56-66. doi:[10.2174/1567205014666170203095802](https://doi.org/10.2174/1567205014666170203095802)
362. Lemere CA, Munger JS, Shi GP, Natkin L, Haass C, Chapman HA, Selkoe DJ. The lysosomal cysteine protease, cathepsin S, is increased in Alzheimer's disease and Down syndrome brain. An immunocytochemical study. *Am J Pathol.* 1995;146(4):848-860.

363. Lin YS, Lin FY, Hsiao YH. Myostatin Is Associated With Cognitive Decline in an Animal Model of Alzheimer's Disease. *Mol Neurobiol.* 2019;56(3):1984-1991. doi:[10.1007/s12035-018-1201-y](https://doi.org/10.1007/s12035-018-1201-y)
364. Hur JY. Innate Immunity Protein IFITM3 in Alzheimer's Disease. *DNA Cell Biol.* 2021;40(11):1351-1355. doi:[10.1089/dna.2021.0585](https://doi.org/10.1089/dna.2021.0585)
365. Cimino PJ, Yang Y, Li X, Hemingway JF, Cherne MK, Khademi SB, Fukui Y, Montine KS, Montine TJ, Keene CD. Ablation of the microglial protein DOCK2 reduces amyloid burden in a mouse model of Alzheimer's disease. *Exp Mol Pathol.* 2013;94(2):366-371. doi:[10.1016/j.yexmp.2013.01.002](https://doi.org/10.1016/j.yexmp.2013.01.002)
366. Baron BW, Pytel P. Expression Pattern of the BCL6 and ITM2B Proteins in Normal Human Brains and in Alzheimer Disease. *Appl Immunohistochem Mol Morphol.* 2017;25(7):489-496. doi:[10.1097/PAI.0000000000000329](https://doi.org/10.1097/PAI.0000000000000329)
367. Lee JY, Han SH, Park MH, Baek B, Song IS, Choi MK, Takuwa Y, Ryu H, Kim SH, He X, et al. Neuronal SphK1 acetylates COX2 and contributes to pathogenesis in a model of Alzheimer's Disease. *Nat Commun.* 2018;9(1):1479. doi:[10.1038/s41467-018-03674-2](https://doi.org/10.1038/s41467-018-03674-2)
368. Zhang X, Zhu C, Beecham G, Vardarajan BN, Ma Y, Lancour D, Farrell JJ, Chung J. A rare missense variant of CASP7 is associated with familial late-onset Alzheimer's disease. *Alzheimers Dement.* 2019;15(3):441-452. doi:[10.1016/j.jalz.2018.10.005](https://doi.org/10.1016/j.jalz.2018.10.005)
369. Lu G, Liu W, Huang X, Zhao Y. Complement factor H levels are decreased and correlated with serum C-reactive protein in late-onset Alzheimer's disease. *Arq Neuropsiquiatr.* 2020;78(2):76-80. doi:[10.1590/0004-282X20190151](https://doi.org/10.1590/0004-282X20190151)
370. Xu M, Zhang DF, Luo R, Wu Y, Zhou H, Kong LL, Bi R, Yao YG. A systematic integrated analysis of brain expression profiles reveals YAP1 and other prioritized hub genes as important upstream regulators in Alzheimer's disease. *Alzheimers Dement.* 2018;14(2):215-229. doi:[10.1016/j.jalz.2017.08.012](https://doi.org/10.1016/j.jalz.2017.08.012)
371. Fessel J. If ineffective levels of transforming growth factors and their receptor account for old age being a risk factor for Alzheimer's disease, then increasing TGFBR2 might be therapeutic. *Alzheimers Dement (N Y).* 2020;6(1):e12019. doi:[10.1002/trc2.12019](https://doi.org/10.1002/trc2.12019)

372. Islam MI, Nagakannan P, Ogungbola O, Djordjevic J, Albensi BC, Eftekharpour E. Thioredoxin system as a gatekeeper in caspase-6 activation and nuclear lamina integrity: Implications for Alzheimer's disease. *Free Radic Biol Med.* 2019;134:567-580. doi:[10.1016/j.freeradbiomed.2019.02.010](https://doi.org/10.1016/j.freeradbiomed.2019.02.010)
373. Rangasamy SB, Jana M, Roy A, Corbett GT, Kundu M, Chandra S, Mondal S, Dasarathi S, Mufson EJ, Mishra RK, et al. Selective disruption of TLR2-MyD88 interaction inhibits inflammation and attenuates Alzheimer's pathology. *J Clin Invest.* 2018;128(10):4297-4312. doi:[10.1172/JCI96209](https://doi.org/10.1172/JCI96209)
374. Xu Y, Cheng L, Sun J, Li F, Liu X, Wei Y, Han M, Zhu Z, Bi J, Lai C, et al. Hypermethylation of Mitochondrial Cytochrome b and Cytochrome c Oxidase II Genes with Decreased Mitochondrial DNA Copy Numbers in the APP/PS1 Transgenic Mouse Model of Alzheimer's Disease. *Neurochem Res.* 2021;46(3):564-572. doi:[10.1007/s11064-020-03192-y](https://doi.org/10.1007/s11064-020-03192-y)
375. Counts SE, Mufson EJ. Regulator of Cell Cycle (RGCC) Expression During the Progression of Alzheimer's Disease. *Cell Transplant.* 2017;26(4):693-702. doi:[10.3727/096368916X694184](https://doi.org/10.3727/096368916X694184)
376. Pons V, Lévesque P, Plante MM, Rivest S. Conditional genetic deletion of CSF1 receptor in microglia ameliorates the physiopathology of Alzheimer's disease. *Alzheimers Res Ther.* 2021;13(1):8. doi:[10.1186/s13195-020-00747-7](https://doi.org/10.1186/s13195-020-00747-7)
377. Zhang Y, Xu C, Nan Y, Nan S. Microglia-Derived Extracellular Vesicles Carrying miR-711 Alleviate Neurodegeneration in a Murine Alzheimer's Disease Model by Binding to Itpkb. *Front Cell Dev Biol.* 2020;8:566530. doi:[10.3389/fcell.2020.566530](https://doi.org/10.3389/fcell.2020.566530)
378. Camacho J, Rábano A, Marazuela P, Bonaterra-Pastra A, Serna G, Moliné T, Ramón Y Cajal S, Martínez-Sáez E, Hernández-Guillamon M. Association of CD2AP neuronal deposits with Braak neurofibrillary stage in Alzheimer's disease. *Brain Pathol.* 2022;32(1):e13016. doi:[10.1111/bpa.13016](https://doi.org/10.1111/bpa.13016)
379. González-Mundo I, Pérez-Vielma NM, Gómez-López M, Fleury A, Correa-Basurto J, Rosales-Hernández MC, Sixto-López Y, Martínez-Godinez MLÁ, Domínguez-López A, Miliar-García A. DNA methylation of the RE-1 silencing transcription factor in peripheral blood mononuclear cells and gene expression of antioxidant enzyme in patients with late-onset



- Alzheimer disease. *Exp Gerontol.* 2020;136:110951. doi:[10.1016/j.exger.2020.110951](https://doi.org/10.1016/j.exger.2020.110951)
380. Wang Z, Xu Q, Cai F, Liu X, Wu Y, Song W. BACE2, a conditional  $\beta$ -secretase, contributes to Alzheimer's disease pathogenesis. *JCI Insight.* 2019;4(1):e123431. doi:[10.1172/jci.insight.123431](https://doi.org/10.1172/jci.insight.123431)
381. Byrne LM, Rodrigues FB, Johnson EB, De Vita E, Blennow K, Scahill R, Zetterberg H, Heslegrave A, Wild EJ. Cerebrospinal fluid neurogranin and TREM2 in Huntington's disease. *Sci Rep.* 2018;8(1):4260. doi:[10.1038/s41598-018-21788-x](https://doi.org/10.1038/s41598-018-21788-x)
382. Lee J, Hwang YJ, Shin JY, Lee WC, Wie J, Kim KY, Lee MY, Hwang D, Ratan RR, Pae AN, et al. Epigenetic regulation of cholinergic receptor M1 (CHRM1) by histone H3K9me3 impairs Ca(2+) signaling in Huntington's disease. *Acta Neuropathol.* 2013;125(5):727-739. doi:[10.1007/s00401-013-1103-z](https://doi.org/10.1007/s00401-013-1103-z)
383. Hays SE, Goodwin FK, Paul SM. Cholecystinin receptors are decreased in basal ganglia and cerebral cortex of Huntington's disease. *Brain Res.* 1981;225(2):452-456. doi:[10.1016/0006-8993\(81\)90853-2](https://doi.org/10.1016/0006-8993(81)90853-2)
384. Rudinskiy N, Kaneko YA, Beesen AA, Gokce O, Régulier E, Déglon N, Luthi-Carter R. Diminished hippocalcin expression in Huntington's disease brain does not account for increased striatal neuron vulnerability as assessed in primary neurons. *J Neurochem.* 2009;111(2):460-472. doi:[10.1111/j.1471-4159.2009.06344.x](https://doi.org/10.1111/j.1471-4159.2009.06344.x)
385. Subbarayan MS, Joly-Amado A, Bickford PC, Nash KR. CX3CL1/CX3CR1 signaling targets for the treatment of neurodegenerative diseases. *Pharmacol Ther.* 2021;107989. doi:[10.1016/j.pharmthera.2021.107989](https://doi.org/10.1016/j.pharmthera.2021.107989)
386. Carnemolla A, Michelazzi S, Agostoni E. PIN1 Modulates Huntingtin Levels and Aggregate Accumulation: An In vitro Model. *Front Cell Neurosci.* 2017;11:121. doi:[10.3389/fncel.2017.00121](https://doi.org/10.3389/fncel.2017.00121)
387. Cherubini M, Puigdellívol M, Alberch J, Ginés S. Cdk5-mediated mitochondrial fission: A key player in dopaminergic toxicity in Huntington's disease. *Biochim Biophys Acta.* 2015;1852(10 Pt A):2145-2160. doi:[10.1016/j.bbadis.2015.06.025](https://doi.org/10.1016/j.bbadis.2015.06.025)
388. Wang H, Del Mar N, Deng Y, Reiner A. Rescue of BDNF expression by the thalamic parafascicular nucleus with chronic treatment with the

- mGluR2/3 agonist LY379268 may contribute to the LY379268 rescue of enkephalinergic striatal projection neurons in R6/2 Huntington's disease mice. *Neurosci Lett.* 2021;763:136180. doi:[10.1016/j.neulet.2021.136180](https://doi.org/10.1016/j.neulet.2021.136180)
389. Goto S, Hirano A. Synaptophysin expression in the striatum in Huntington's disease. *Acta Neuropathol.* 1990;80(1):88-91. doi:[10.1007/BF00294227](https://doi.org/10.1007/BF00294227)
390. Bertoglio D, Verhaeghe J, Wyffels L, Miranda A, Stroobants S, Mrzljak L, Dominguez C, Skinbjerg M, Bard J, Liu L, et al. Synaptic vesicle glycoprotein 2A is affected in the CNS of Huntington's Disease mice and post-mortem human HD brain. *J Nucl Med.* 2021;jnumed.121.262709. doi:[10.2967/jnumed.121.262709](https://doi.org/10.2967/jnumed.121.262709)
391. Griffioen K, Mattson MP, Okun E. Deficiency of Toll-like receptors 2, 3 or 4 extends life expectancy in Huntington's disease mice. *Heliyon.* 2018;4(1):e00508. doi:[10.1016/j.heliyon.2018.e00508](https://doi.org/10.1016/j.heliyon.2018.e00508)
392. Larkin PB, Muchowski PJ. Genetic Deficiency of Complement Component 3 Does Not Alter Disease Progression in a Mouse Model of Huntington's Disease. *J Huntingtons Dis.* 2012;1(1):107-118. doi:[10.3233/JHD-2012-120021](https://doi.org/10.3233/JHD-2012-120021)
393. Bailus BJ, Scheeler SM, Simons J, Sanchez MA, Tshilenge KT, Creus-Muncunill J, Naphade S, Lopez-Ramirez A, Zhang N, Lakshika Madushani K, et al. Modulating FKBP5/FKBP51 and autophagy lowers HTT (huntingtin) levels. *Autophagy.* 2021;17(12):4119-4140. doi:[10.1080/15548627.2021.1904489](https://doi.org/10.1080/15548627.2021.1904489)
394. Sharma M, Rajendrarao S, Shahani N, Ramírez-Jarquín UN, Subramaniam S. Cyclic GMP-AMP synthase promotes the inflammatory and autophagy responses in Huntington disease. *Proc Natl Acad Sci U S A.* 2020;117(27):15989-15999. doi:[10.1073/pnas.2002144117](https://doi.org/10.1073/pnas.2002144117)
395. Bondulich MK, Jolinon N, Osborne GF, Smith EJ, Rattray I, Neueder A, Sathasivam K, Ahmed M, Ali N, Benjamin AC, et al. Myostatin inhibition prevents skeletal muscle pathophysiology in Huntington's disease mice. *Sci Rep.* 2017;7(1):14275. Published 2017 Oct 27. doi:[10.1038/s41598-017-14290-3](https://doi.org/10.1038/s41598-017-14290-3)
396. Wong BKY, Ehrnhoefer DE, Graham RK, Martin DDO, Ladha S, Uribe V, Stanek LM, Franciosi S, Qiu X, Deng Y, et al. Partial rescue of some features of Huntington Disease in the genetic absence of caspase-6 in

- YAC128 mice. *Neurobiol Dis.* 2015;76:24-36. doi:[10.1016/j.nbd.2014.12.030](https://doi.org/10.1016/j.nbd.2014.12.030)
397. Orozco-Díaz R, Sánchez-Álvarez A, Hernández-Hernández JM, Tapia-Ramírez J. The interaction between RE1-silencing transcription factor (REST) and heat shock protein 90 as new therapeutic target against Huntington's disease. *PLoS One.* 2019;14(7):e0220393. doi:[10.1371/journal.pone.0220393](https://doi.org/10.1371/journal.pone.0220393)
398. Picó S, Parras A, Santos-Galindo M, Pose-Utrilla J, Castro M, Fraga E, Hernández IH, Elorza A, Anta H, Wang N, et al. CPEB alteration and aberrant transcriptome-polyadenylation lead to a treatable SLC19A3 deficiency in Huntington's disease. *Sci Transl Med.* 2021;13(613):eabe7104. doi:[10.1126/scitranslmed.abe7104](https://doi.org/10.1126/scitranslmed.abe7104)
399. Sferra A, Fattori F, Rizza T, Flex E, Bellacchio E, Bruselles A, Petrini S, Cecchetti S, Teson M, Restaldi F, et al. Defective kinesin binding of TUBB2A causes progressive spastic ataxia syndrome resembling saccinopathy. *Hum Mol Genet.* 2018;27(11):1892-1904. doi:[10.1093/hmg/ddy096](https://doi.org/10.1093/hmg/ddy096)
400. Cheng C, Hou Y, Zhang Z, Wang Y, Lu L, Zhang L, Jiang P, Gao S, Fang Q, Zhu C, et al. Disruption of the autism-related gene Pak1 causes stereocilia disorganization, hair cell loss, and deafness in mice. *J Genet Genomics.* 2021;48(4):324-332. doi:[10.1016/j.jgg.2021.03.010](https://doi.org/10.1016/j.jgg.2021.03.010)
401. Verbeek DS, Knight MA, Harmison GG, Fischbeck KH, Howell BW. Protein kinase C gamma mutations in spinocerebellar ataxia 14 increase kinase activity and alter membrane targeting. *Brain.* 2005;128(Pt 2):436-442. doi:[10.1093/brain/awh378](https://doi.org/10.1093/brain/awh378)
402. Coutelier M, Blesneac I, Monteil A, Monin ML, Ando K, Mundwiller E, Brusco A, Le Ber I, Anheim M, Castrioto A, A Recurrent Mutation in CACNA1G Alters Cav3.1 T-Type Calcium-Channel Conduction and Causes Autosomal-Dominant Cerebellar Ataxia. *Am J Hum Genet.* 2015;97(5):726-737. doi:[10.1016/j.ajhg.2015.09.007](https://doi.org/10.1016/j.ajhg.2015.09.007)
403. Garcez D, Marques J, Fernandes M, Coimbra MF, Lourenço MC, Machado D, Freire J. ATP1A3: an unusual antigen to consider in patients with subacute ataxia and vertical gaze palsy. *Mult Scler Relat Disord.* 2020;43:102160. doi:[10.1016/j.msard.2020.102160](https://doi.org/10.1016/j.msard.2020.102160)

404. Al Dhaibani MA, El-Hattab AW, Holroyd KB, Orthmann-Murphy J, Larson VA, Siddiqui KA, Szolics M, Schiess N. Novel mutation in the KCNJ10 gene in three siblings with seizures, ataxia and no electrolyte abnormalities. *J Neurogenet.* 2018;32(1):1-5. doi:[10.1080/01677063.2017.1404057](https://doi.org/10.1080/01677063.2017.1404057)
405. Al-Eitan LN, Al-Dalalah IM, Aljamal HA. Effects of GRM4, SCN2A and SCN3B polymorphisms on antiepileptic drugs responsiveness and epilepsy susceptibility. *Saudi Pharm J.* 2019;27(5):731-737. doi:[10.1016/j.jsps.2019.04.009](https://doi.org/10.1016/j.jsps.2019.04.009)
406. Gecz J, Thomas PQ. Disentangling the paradox of the PCDH19 clustering epilepsy, a disorder of cellular mosaics. *Curr Opin Genet Dev.* 2020;65:169-175. doi:[10.1016/j.gde.2020.06.012](https://doi.org/10.1016/j.gde.2020.06.012)
407. Friedman JI, Vrijenhoek T, Markx S, Janssen IM, van der Vliet WA, Faas BH, Knoers NV, Cahn W, Kahn RS, Edelmann L, et al. CNTNAP2 gene dosage variation is associated with schizophrenia and epilepsy. *Mol Psychiatry.* 2008;13(3):261-266. doi:[10.1038/sj.mp.4002049](https://doi.org/10.1038/sj.mp.4002049)
408. Stamberger H, Nikanorova M, Willemsen MH, Accorsi P, Angriman M, Baier H, Benkel-Herrenbrueck I, Benoit V, Budetta M, Caliebe A, et al. STXBP1 encephalopathy: A neurodevelopmental disorder including epilepsy. *Neurology.* 2016;86(10):954-962. doi:[10.1212/WNL.0000000000002457](https://doi.org/10.1212/WNL.0000000000002457)
409. Cadieux-Dion M, Meneghini S, Villa C, Toffa DH, Wickstrom R, Bouthillier A, Sandvik U, Gustavsson B, Mohamed I, Cossette P, et al. Variants in CHRNA4 and CHRNA2 Identified in Patients with Insular Epilepsy. *Can J Neurol Sci.* 2020;47(6):800-809. doi:[10.1017/cjn.2020.126](https://doi.org/10.1017/cjn.2020.126)
410. Xi Z, Deng W, Wang L, Xiao F, Li J, Wang Z, Wang X, Mi X, Wang N, Wang X. Association of Alpha-Soluble NSF Attachment Protein with Epileptic Seizure. *J Mol Neurosci.* 2015;57(3):417-425. doi:[10.1007/s12031-015-0596-4](https://doi.org/10.1007/s12031-015-0596-4)
411. Wang S, Zhou L, He C, Wang D, Cai X, Yu Y, Chen L, Lu D, Bian L, Du S, et al. The Association Between STX1B Polymorphisms and Treatment Response in Patients With Epilepsy. *Front Pharmacol.* 2021;12:701575. doi:[10.3389/fphar.2021.701575](https://doi.org/10.3389/fphar.2021.701575)
412. Kang JQ, Macdonald RL. Molecular Pathogenic Basis for GABRG2 Mutations Associated With a Spectrum of Epilepsy Syndromes, From

- Generalized Absence Epilepsy to Dravet Syndrome. *JAMA Neurol.* 2016;73(8):1009-1016. doi:[10.1001/jamaneurol.2016.0449](https://doi.org/10.1001/jamaneurol.2016.0449)
413. Friedman JI, Vrijenhoek T, Markx S, Janssen IM, van der Vliet WA, Faas BH, Knoers NV, Cahn W, Kahn RS, Edelmann L, et al. CNTNAP2 gene dosage variation is associated with schizophrenia and epilepsy. *Mol Psychiatry.* 2008;13(3):261-266. doi:[10.1038/sj.mp.4002049](https://doi.org/10.1038/sj.mp.4002049)
414. Kalscheuer VM, Musante L, Fang C, Hoffmann K, Fuchs C, Carta E, Deas E, Venkateswarlu K, Menzel C, Ullmann R, et al. A balanced chromosomal translocation disrupting ARHGEF9 is associated with epilepsy, anxiety, aggression, and mental retardation. *Hum Mutat.* 2009;30(1):61-68. doi:[10.1002/humu.20814](https://doi.org/10.1002/humu.20814)
415. Hallmann K, Kudin AP, Zsurka G, Kornblum C, Reimann J, Stüve B, Waltz S, Hattingen E, Thiele H, Nürnberg P, et al. Loss of the smallest subunit of cytochrome c oxidase, COX8A, causes Leigh-like syndrome and epilepsy. *Brain.* 2016;139(Pt 2):338-345. doi:[10.1093/brain/awv357](https://doi.org/10.1093/brain/awv357)
416. Lv RJ, He JS, Fu YH, Shao XQ, Wu LW, Lu Q, Jin LR, Liu H.A polymorphism in CALHM1 is associated with temporal lobe epilepsy. *Epilepsy Behav.* 2011;20(4):681-685. doi:[10.1016/j.yebeh.2011.02.007](https://doi.org/10.1016/j.yebeh.2011.02.007)
417. Srour M, Shimokawa N, Hamdan FF, Nassif C, Poulin C, Al Gazali L, Rosenfeld JA, Koibuchi N, Rouleau GA, Al Shamsi A, et al. Dysfunction of the Cerebral Glucose Transporter SLC45A1 in Individuals with Intellectual Disability and Epilepsy. *Am J Hum Genet.* 2017;100(5):824-830. doi:[10.1016/j.ajhg.2017.03.009](https://doi.org/10.1016/j.ajhg.2017.03.009)
418. Zhao MW, Qiu WJ, Yang P. SP1 activated-lncRNA SNHG1 mediates the development of epilepsy via miR-154-5p/TLR5 axis. *Epilepsy Res.* 2020;168:106476. doi:[10.1016/j.eplesyres.2020.106476](https://doi.org/10.1016/j.eplesyres.2020.106476)
419. Jiang C, Li L, Wu M, Hao M, Feng J. Association of KCNJ10 variants and the susceptibility to clinical epilepsy. *Clin Neurol Neurosurg.* 2021;200:106340. doi:[10.1016/j.clineuro.2020.106340](https://doi.org/10.1016/j.clineuro.2020.106340)
420. Shao K, Shan S, Ru W, Ma C. Association between serum NPTX2 and cognitive function in patients with vascular dementia. *Brain Behav.* 2020;10(10):e01779. doi:[10.1002/brb3.1779](https://doi.org/10.1002/brb3.1779)
421. Vallortigara J, Whitfield D, Quelch W, Alghamdi A, Howlett D, Hortobágyi T, Johnson M, Attems J, O'Brien JT, Thomas A, et al. Decreased Levels of VAMP2 and Monomeric Alpha-Synuclein Correlate with Duration



- of Dementia. *J Alzheimers Dis.* 2016;50(1):101-110. doi:[10.3233/JAD-150707](https://doi.org/10.3233/JAD-150707)
422. Cohn-Hokke PE, Wong TH, Rizzu P, Breedveld G, van der Flier WM, Scheltens P, Baas F, Heutink P, Meijers-Heijboer EJ, van Swieten JC, et al. Mutation frequency of PRKAR1B and the major familial dementia genes in a Dutch early onset dementia cohort. *J Neurol.* 2014;261(11):2085-2092. doi:[10.1007/s00415-014-7456-y](https://doi.org/10.1007/s00415-014-7456-y)
423. Helbig I, Lopez-Hernandez T, Shor O, Galer P, Ganesan S, Pendziwiat M, Rademacher A, Ellis CA, Hümpfer N, Schwarz N, et al. A Recurrent Missense Variant in AP2M1 Impairs Clathrin-Mediated Endocytosis and Causes Developmental and Epileptic Encephalopathy. *Am J Hum Genet.* 2019;104(6):1060-1072. doi:[10.1016/j.ajhg.2019.04.001](https://doi.org/10.1016/j.ajhg.2019.04.001)
424. Mol MO, Wong TH, Melhem S, Basu S, Viscusi R, Galjart N, Rozemuller AJM, Fallini C, Landers JE, Kaat LD, et al. Novel TUBA4A Variant Associated With Familial Frontotemporal Dementia. *Neurol Genet.* 2021;7(3):e596. doi:[10.1212/NXG.0000000000000596](https://doi.org/10.1212/NXG.0000000000000596)
425. Goldstein O, Gana-Weisz M, Shiner T, Attar R, Mordechai Y, Waldman YY, Bar-Shira A, Thaler A, Gurevich T, Mirelman A, et al. R869C mutation in molecular motor KIF17 gene is involved in dementia with Lewy bodies. *Alzheimers Dement (Amst).* 2021;13(1):e12143. doi:[10.1002/dad2.12143](https://doi.org/10.1002/dad2.12143)
426. Kim Y, Kong M, Lee C. Association of intronic sequence variant in the gene encoding spleen tyrosine kinase with susceptibility to vascular dementia. *World J Biol Psychiatry.* 2013;14(3):220-226. doi:[10.3109/15622975.2011.559272](https://doi.org/10.3109/15622975.2011.559272)
427. Kumari R, Kumar R, Kumar S, Singh AK, Hanpude P, Jangir D, Maiti TK. Amyloid aggregates of the deubiquitinase OTUB1 are neurotoxic, suggesting that they contribute to the development of Parkinson's disease. *J Biol Chem.* 2020;295(11):3466-3484. doi:[10.1074/jbc.RA119.009546](https://doi.org/10.1074/jbc.RA119.009546)
428. Miron J, Picard C, Labonté A, Auld D, Breitner J, Poirier J. Association of PPP2R1A with Alzheimer's disease and specific cognitive domains. *Neurobiol Aging.* 2019;81:234-243. doi:[10.1016/j.neurobiolaging.2019.06.008](https://doi.org/10.1016/j.neurobiolaging.2019.06.008)
429. Groen K, Maltby VE, Scott RJ, Tajouri L, Lechner-Scott J. Erythrocyte microRNAs show biomarker potential and implicate multiple



- sclerosis susceptibility genes. *Clin Transl Med.* 2020;10(1):74-90. doi:[10.1002/ctm2.22](https://doi.org/10.1002/ctm2.22)
430. Wu YE, Parikshak NN, Belgard TG, Geschwind DH. Genome-wide, integrative analysis implicates microRNA dysregulation in autism spectrum disorder. *Nat Neurosci.* 2016;19(11):1463-1476. doi:[10.1038/nn.4373](https://doi.org/10.1038/nn.4373)
431. Kurzawski M, Białecka M, Sławek J, Kłodowska-Duda G, Drożdżik M. Association study of GATA-2 transcription factor gene (GATA2) polymorphism and Parkinson's disease. *Parkinsonism Relat Disord.* 2010;16(4):284-287. doi:[10.1016/j.parkreldis.2009.10.006](https://doi.org/10.1016/j.parkreldis.2009.10.006)
432. Lou F, Li M, Liu N, Li X, Ren Y, Luo X. The polymorphism of SREBF1 gene rs11868035 G/A is associated with susceptibility to Parkinson's disease in a Chinese population. *Int J Neurosci.* 2019;129(7):660-665. doi:[10.1080/00207454.2018.1526796](https://doi.org/10.1080/00207454.2018.1526796)
433. Yuan X, Cao B, Wu Y, Chen Y, Wei Q, Ou R, Yang J, Chen X, Zhao B, Song W, et al. Association analysis of SNP rs11868035 in SREBF1 with sporadic Parkinson's disease, sporadic amyotrophic lateral sclerosis and multiple system atrophy in a Chinese population. *Neurosci Lett.* 2018;664:128-132. doi:[10.1016/j.neulet.2017.11.015](https://doi.org/10.1016/j.neulet.2017.11.015)
434. Yang L, Chen J, Li Y, Wang Y, Liang S, Shi Y, Shi S, Xu Y. Association between SCAP and SREBF1 gene polymorphisms and metabolic syndrome in schizophrenia patients treated with atypical antipsychotics. *World J Biol Psychiatry.* 2016;17(6):467-474. doi:[10.3109/15622975.2016.1165865](https://doi.org/10.3109/15622975.2016.1165865)

## Tables

**Table 1** The statistical metrics for key differentially expressed genes (DEGs)

| Gene Symbol | logFC    | pValue   | adj.P.Val | tvalue   | Regulation | Gene Name                                                       |
|-------------|----------|----------|-----------|----------|------------|-----------------------------------------------------------------|
| LINC01833   | 2.212635 | 6.44E-05 | 0.004097  | 3.99604  | Up         | long intergenic non-protein coding RNA 1833                     |
| VEGF        | 2.131639 | 2.00E-07 | 9.17E-05  | 5.199595 | Up         | VEGF nerve growth factor inducible                              |
| CRH         | 2.103757 | 4.20E-05 | 0.00323   | 4.096027 | Up         | corticotropin releasing hormone                                 |
| SLC4A1      | 1.796946 | 0.002266 | 0.036023  | 3.052926 | Up         | solute carrier family 4 member 1 (Diego blood group)            |
| ALG1L       | 1.793344 | 0.000116 | 0.005919  | 3.853828 | Up         | ALG1 chitobiosyldiphosphodolichol beta-mannosyltransferase like |
| KRT5        | 1.778486 | 5.65E-05 | 0.003847  | 4.026933 | Up         | keratin 5                                                       |
| NPAS4       | 1.722534 | 0.001861 | 0.031987  | 3.111622 | Up         | neuronal PAS domain protein 4                                   |

|              |          |          |          |          |    |                                                                                         |
|--------------|----------|----------|----------|----------|----|-----------------------------------------------------------------------------------------|
| DUSP4        | 1.680536 | 1.03E-07 | 6.61E-05 | 5.321414 | Up | dual specificity phosphatase 4                                                          |
| CCDC188      | 1.56968  | 8.14E-09 | 1.99E-05 | 5.765436 | Up | coiled-coil domain containing 188                                                       |
| SST          | 1.493994 | 2.38E-06 | 0.00052  | 4.718268 | Up | somatostatin                                                                            |
| STIM1-AS1    | 1.477298 | 0.002806 | 0.040879 | 2.98819  | Up | STIM1 antisense RNA 1                                                                   |
| LKAAEAR1     | 1.443122 | 0.00099  | 0.022034 | 3.293415 | Up | LKAAEAR motif containing 1                                                              |
| NMBR         | 1.422491 | 0.00084  | 0.01994  | 3.339292 | Up | neuromedin B receptor                                                                   |
| KNCN         | 1.405007 | 1.29E-05 | 0.001551 | 4.361652 | Up | kinocilin                                                                               |
| TMEM132E-DT  | 1.372374 | 2.50E-08 | 2.85E-05 | 5.573417 | Up | TMEM132E divergent transcript<br>long intergenic non-protein coding RNA<br>1164         |
| LINC01164    | 1.333661 | 7.57E-05 | 0.004516 | 3.957733 | Up |                                                                                         |
| EGR2         | 1.330185 | 0.000487 | 0.014399 | 3.487992 | Up | early growth response 2                                                                 |
| PNOC         | 1.328968 | 0.00038  | 0.012598 | 3.553895 | Up | prepronociceptin                                                                        |
| EGR1         | 1.328009 | 3.09E-08 | 3.15E-05 | 5.536344 | Up | early growth response 1                                                                 |
| NEBL-AS1     | 1.327243 | 0.000923 | 0.021247 | 3.313065 | Up | NEBL antisense RNA 1                                                                    |
| LINC00898    | 1.312136 | 8.69E-09 | 1.99E-05 | 5.754432 | Up | long intergenic non-protein coding RNA 898                                              |
| ATOX7        | 1.302083 | 1.30E-05 | 0.001559 | 4.359519 | Up | atonal bHLH transcription factor 7<br>long intergenic non-protein coding RNA<br>1007    |
| LINC01007    | 1.295971 | 0.000109 | 0.005643 | 3.870309 | Up | long intergenic non-protein coding RNA<br>1844                                          |
| LINC01844    | 1.21576  | 0.001892 | 0.032354 | 3.106686 | Up |                                                                                         |
| ASB2         | 1.203348 | 1.57E-06 | 0.000386 | 4.802035 | Up | ankyrin repeat and SOCS box containing 2                                                |
| H1-7         | 1.182691 | 0.002731 | 0.040317 | 2.996468 | Up | H1.7 linker histone                                                                     |
| SNORA5C      | 1.171637 | 0.001775 | 0.031151 | 3.125504 | Up | small nucleolar RNA, H/ACA box 5C                                                       |
| LINC00507    | 1.167703 | 0.001675 | 0.030026 | 3.142502 | Up | long intergenic non-protein coding RNA 507                                              |
| RNU2-61P     | 1.163243 | 0.00242  | 0.037479 | 3.033108 | Up | RNA, U2 small nuclear 61, pseudogene<br>family with sequence similarity 163 member<br>A |
| FAM163A      | 1.157978 | 0.000989 | 0.022033 | 3.293654 | Up |                                                                                         |
| RN7SKP70     | 1.142311 | 0.0004   | 0.01304  | 3.539856 | Up | RN7SK pseudogene 70                                                                     |
| LOC101929473 | 1.139658 | 0.001776 | 0.031151 | 3.12534  | Up | uncharacterized LOC101929473<br>long intergenic non-protein coding RNA<br>1511          |
| LINC01511    | 1.12459  | 2.43E-05 | 0.002285 | 4.220911 | Up |                                                                                         |
| NAT16        | 1.119217 | 0.000211 | 0.008662 | 3.705196 | Up | N-acetyltransferase 16 (putative)                                                       |
| MYLK2        | 1.114274 | 0.002865 | 0.041426 | 2.981848 | Up | myosin light chain kinase 2                                                             |
| C1QTNF4      | 1.109643 | 0.000202 | 0.008426 | 3.716351 | Up | C1q and TNF related 4                                                                   |
| GNG3         | 1.107955 | 7.41E-05 | 0.00445  | 3.962821 | Up | G protein subunit gamma 3                                                               |
| IL11         | 1.104274 | 0.002167 | 0.035108 | 3.066305 | Up | interleukin 11<br>long intergenic non-protein coding RNA<br>2395                        |
| LINC02395    | 1.103745 | 0.001607 | 0.029425 | 3.154692 | Up |                                                                                         |
| SLC30A3      | 1.103415 | 1.61E-07 | 8.18E-05 | 5.239957 | Up | solute carrier family 30 member 3                                                       |
| WNT1         | 1.096887 | 0.000584 | 0.01581  | 3.439031 | Up | Wnt family member 1<br>long intergenic non-protein coding RNA<br>1166                   |
| LINC01166    | 1.089345 | 3.45E-06 | 0.000671 | 4.64193  | Up |                                                                                         |
| LINC00003    | 1.088305 | 0.000667 | 0.017076 | 3.402735 | Up | uncharacterized LincR-0003                                                              |
| TMEM200B     | 1.0842   | 0.0006   | 0.015989 | 3.431398 | Up | transmembrane protein 200B                                                              |
| RGS8         | 1.066287 | 0.000142 | 0.00676  | 3.804452 | Up | regulator of G protein signaling 8                                                      |
| NXPH2        | 1.065488 | 1.23E-05 | 0.001512 | 4.372983 | Up | neurexophilin 2                                                                         |
| HTR7P1       | 1.065194 | 2.60E-06 | 0.000545 | 4.700413 | Up | 5-hydroxytryptamine receptor 7 pseudogene<br>1                                          |
| SPATA2L      | 1.064875 | 0.000722 | 0.018096 | 3.38103  | Up | spermatogenesis associated 2 like                                                       |

|            |          |          |          |          |    |                                                                  |
|------------|----------|----------|----------|----------|----|------------------------------------------------------------------|
| MPO        | 1.061456 | 0.001491 | 0.028188 | 3.176506 | Up | myeloperoxidase                                                  |
| CALY       | 1.058472 | 2.87E-05 | 0.002531 | 4.183293 | Up | calcyon neuron specific vesicular protein                        |
| CCKBR      | 1.057445 | 7.08E-10 | 3.25E-06 | 6.164244 | Up | cholecystokinin B receptor                                       |
| DUSP2      | 1.050214 | 0.00012  | 0.006039 | 3.845792 | Up | dual specificity phosphatase 2                                   |
| HTR3B      | 1.047519 | 1.47E-06 | 0.000368 | 4.815083 | Up | 5-hydroxytryptamine receptor 3B                                  |
| CCDC184    | 1.044973 | 1.19E-05 | 0.00148  | 4.379617 | Up | coiled-coil domain containing 184                                |
| KLHL14     | 1.044323 | 0.001036 | 0.02264  | 3.280668 | Up | kelch like family member 14                                      |
| ARC        | 1.043606 | 0.001482 | 0.028057 | 3.178254 | Up | activity regulated cytoskeleton associated protein               |
| SETBP1-DT  | 1.042941 | 9.97E-07 | 0.000286 | 4.892294 | Up | SETBP1 divergent transcript                                      |
| ARL4D      | 1.036606 | 2.01E-05 | 0.002057 | 4.263784 | Up | ADP ribosylation factor like GTPase 4D                           |
| NPBWR2     | 1.033997 | 0.002703 | 0.04003  | 2.999628 | Up | neuropeptides B and W receptor 2                                 |
| IGFN1      | 1.033662 | 0.001777 | 0.031151 | 3.12525  | Up | immunoglobulin like and fibronectin type III domain containing 1 |
| ADCYAP1    | 1.028408 | 0.001253 | 0.025344 | 3.226532 | Up | adenylate cyclase activating polypeptide 1                       |
| CCNO       | 1.024066 | 0.000774 | 0.018941 | 3.361922 | Up | cyclin O                                                         |
| SPAG6      | 1.023468 | 1.55E-05 | 0.001779 | 4.322115 | Up | sperm associated antigen 6                                       |
| MIR381HG   | 1.020826 | 0.000146 | 0.006848 | 3.798461 | Up | MIR381 host gene                                                 |
| PHEX-AS1   | 1.019008 | 0.000292 | 0.010699 | 3.621923 | Up | PHEX antisense RNA 1                                             |
| KCNF1      | 1.018495 | 3.74E-05 | 0.00295  | 4.122699 | Up | potassium voltage-gated channel modifier subfamily F member 1    |
| NCALD      | 1.006859 | 4.11E-06 | 0.000739 | 4.605993 | Up | neurocalcin delta                                                |
| RHEBL1     | 1.002658 | 2.96E-06 | 0.0006   | 4.673275 | Up | RHEB like 1                                                      |
| FAM241B    | 1.002644 | 3.48E-07 | 0.000127 | 5.095148 | Up | family with sequence similarity 241 member B                     |
| CRYM       | 0.999919 | 1.08E-06 | 0.000301 | 4.875934 | Up | crystallin mu                                                    |
| PNMA5      | 0.999269 | 0.00027  | 0.010154 | 3.642726 | Up | PNMA family member 5                                             |
| SPEF1      | 0.995432 | 0.000171 | 0.007525 | 3.758513 | Up | sperm flagellar 1                                                |
| GABRD      | 0.994856 | 8.96E-05 | 0.005043 | 3.917109 | Up | gamma-aminobutyric acid type A receptor subunit delta            |
| MUC5B      | 0.994303 | 0.001389 | 0.026913 | 3.196937 | Up | mucin 5B, oligomeric mucus/gel-forming                           |
| PAFAH1B2P2 | 0.989228 | 9.84E-05 | 0.005372 | 3.894498 | Up | PAFAH1B2 pseudogene 2                                            |
| OTOGL      | 0.987975 | 2.24E-05 | 0.002186 | 4.239516 | Up | otogelin like                                                    |
| CACNA1G    | 0.984512 | 3.03E-07 | 0.000116 | 5.121297 | Up | calcium voltage-gated channel subunit alpha1 G                   |
| NOXA1      | 0.983213 | 0.001539 | 0.028737 | 3.167143 | Up | NADPH oxidase activator 1                                        |
| LINC02263  | 0.981981 | 5.34E-05 | 0.003751 | 4.040023 | Up | long intergenic non-protein coding RNA 2263                      |
| LRTM2      | 0.978132 | 8.06E-08 | 5.84E-05 | 5.36568  | Up | leucine rich repeats and transmembrane domains 2                 |
| PCSK1      | 0.977999 | 2.17E-05 | 0.00217  | 4.246396 | Up | proprotein convertase subtilisin/kexin type 1                    |
| FCRLB      | 0.975319 | 0.000161 | 0.007289 | 3.77337  | Up | Fc receptor like B                                               |
| SCN5A      | 0.972722 | 0.0018   | 0.031306 | 3.12137  | Up | sodium voltage-gated channel alpha subunit 5                     |
| IGFBP2     | 0.965253 | 0.000417 | 0.013342 | 3.529377 | Up | insulin like growth factor binding protein 2                     |
| RHOV       | 0.962706 | 0.000919 | 0.021187 | 3.314091 | Up | ras homolog family member V                                      |
| LOXHD1     | 0.961081 | 0.000527 | 0.015006 | 3.466415 | Up | lipoxigenase homology PLAT domains 1                             |
| FAM71E1    | 0.959481 | 5.33E-05 | 0.003749 | 4.04077  | Up | family with sequence similarity 71 member E1                     |
| EMILIN3    | 0.95933  | 0.001747 | 0.030817 | 3.130143 | Up | elastin microfibril interfacier 3                                |

|              |          |          |          |          |    |                                                           |
|--------------|----------|----------|----------|----------|----|-----------------------------------------------------------|
| HTR2C        | 0.95794  | 1.84E-05 | 0.001932 | 4.28366  | Up | 5-hydroxytryptamine receptor 2C                           |
| SLC10A4      | 0.955588 | 0.001155 | 0.024038 | 3.249775 | Up | solute carrier family 10 member 4                         |
| ADAMTS8      | 0.950264 | 1.10E-07 | 6.61E-05 | 5.30901  | Up | ADAM metalloproteinase with thrombospondin type 1 motif 8 |
| PRSS16       | 0.948823 | 4.20E-06 | 0.000744 | 4.601113 | Up | serine protease 16                                        |
| TAMALIN      | 0.939267 | 2.40E-06 | 0.00052  | 4.716429 | Up | trafficking regulator and scaffold protein tamalin        |
| SPRED3       | 0.938141 | 9.05E-05 | 0.005046 | 3.914717 | Up | sprouty related EVH1 domain containing 3                  |
| CTXN1        | 0.935837 | 0.002887 | 0.041605 | 2.979563 | Up | cortexin 1                                                |
| LOC101929237 | 0.931389 | 0.001255 | 0.025344 | 3.226177 | Up | uncharacterized LOC101929237                              |
| RBP4         | 0.927886 | 4.67E-05 | 0.003439 | 4.071308 | Up | retinol binding protein 4                                 |
| SLC22A6      | 0.927636 | 5.17E-05 | 0.003695 | 4.047731 | Up | solute carrier family 22 member 6                         |
| TPBGL        | 0.924874 | 0.000495 | 0.014532 | 3.483518 | Up | trophoblast glycoprotein like                             |
| FFAR4        | 0.921381 | 0.00022  | 0.008915 | 3.6951   | Up | free fatty acid receptor 4                                |
| TSTD1        | 0.921219 | 5.12E-05 | 0.003678 | 4.050084 | Up | thiosulfate sulfurtransferase like domain containing 1    |
| TRBC2        | 0.916751 | 0.000668 | 0.017077 | 3.402463 | Up | T cell receptor beta constant 2                           |
| RTN4R        | 0.911203 | 0.001422 | 0.027386 | 3.190087 | Up | reticulon 4 receptor                                      |
| ICAM5        | 0.908596 | 0.0002   | 0.008374 | 3.719465 | Up | intercellular adhesion molecule 5                         |
| ADTRP        | 0.906103 | 0.000339 | 0.011851 | 3.583866 | Up | androgen dependent TFPI regulating protein                |
| SLC32A1      | 0.905117 | 0.000725 | 0.018142 | 3.380095 | Up | solute carrier family 32 member 1                         |
| PCDHGC5      | 0.903135 | 6.69E-10 | 3.25E-06 | 6.173303 | Up | protocadherin gamma subfamily C, 5                        |
| NNAT         | 0.898213 | 1.18E-07 | 6.78E-05 | 5.296114 | Up | neuronatin                                                |
| TMEM59L      | 0.897991 | 1.81E-05 | 0.001932 | 4.287547 | Up | transmembrane protein 59 like                             |
| SVOP         | 0.894023 | 1.26E-06 | 0.000333 | 4.84602  | Up | SV2 related protein                                       |
| LINC01310    | 0.892091 | 0.000676 | 0.017281 | 3.398957 | Up | long intergenic non-protein coding RNA 1310               |
| SDR9C7       | 0.889396 | 0.002464 | 0.037894 | 3.027746 | Up | short chain dehydrogenase/reductase family 9C member 7    |
| NEUROD6      | 0.887312 | 0.000503 | 0.014643 | 3.479082 | Up | neuronal differentiation 6                                |
| KCNH4        | 0.88385  | 0.00053  | 0.015013 | 3.465083 | Up | potassium voltage-gated channel subfamily H member 4      |
| ADRA1D       | 0.882775 | 0.003653 | 0.047791 | 2.906695 | Up | adrenoceptor alpha 1D                                     |
| PPEF1        | 0.881533 | 0.000756 | 0.018682 | 3.368542 | Up | protein phosphatase with EF-hand domain 1                 |
| TUBAP7       | 0.876317 | 0.002614 | 0.039265 | 3.009812 | Up | tubulin alpha pseudogene 7                                |
| CHRNA7       | 0.869866 | 0.000503 | 0.014643 | 3.47891  | Up | cholinergic receptor nicotinic alpha 7 subunit            |
| RPSAP69      | 0.869107 | 9.55E-06 | 0.001258 | 4.427066 | Up | ribosomal protein SA pseudogene 69                        |
| MCHR2        | 0.867996 | 3.22E-05 | 0.002719 | 4.157207 | Up | melanin concentrating hormone receptor 2                  |
| GJD2         | 0.866984 | 7.81E-05 | 0.004602 | 3.950133 | Up | gap junction protein delta 2                              |
| PLPPR3       | 0.85795  | 0.002565 | 0.038859 | 3.0156   | Up | phospholipid phosphatase related 3                        |
| SOWAHB       | 0.856553 | 2.21E-05 | 0.002185 | 4.242315 | Up | sosondowah ankyrin repeat domain family member B          |
| MAP1LC3A     | 0.85541  | 0.000286 | 0.01054  | 3.627531 | Up | microtubule associated protein 1 light chain 3 alpha      |
| PTPRD-AS2    | 0.849675 | 0.000833 | 0.01982  | 3.341685 | Up | PTPRD antisense RNA 2 (head to head)                      |
| BEST4        | 0.84705  | 0.001882 | 0.032248 | 3.108211 | Up | bestrophin 4                                              |
| SH2D5        | 0.843189 | 3.08E-06 | 0.000618 | 4.665614 | Up | SH2 domain containing 5                                   |
| TMEM221      | 0.843085 | 0.000304 | 0.010996 | 3.611761 | Up | transmembrane protein 221                                 |
| HPX          | 0.84217  | 0.003737 | 0.048438 | 2.899508 | Up | hemopexin                                                 |

|           |          |          |          |          |    |                                                         |
|-----------|----------|----------|----------|----------|----|---------------------------------------------------------|
| REM2      | 0.84118  | 0.002474 | 0.037981 | 3.026482 | Up | RRAD and GEM like GTPase 2                              |
| STX1A     | 0.840295 | 5.97E-08 | 4.70E-05 | 5.419548 | Up | syntaxin 1A                                             |
| FBN3      | 0.838099 | 0.003168 | 0.043862 | 2.950937 | Up | fibrillin 3                                             |
| NRGN      | 0.836966 | 0.000152 | 0.007049 | 3.788326 | Up | neurogranin                                             |
| FLG       | 0.835054 | 0.002961 | 0.042045 | 2.971792 | Up | filaggrin                                               |
| RPH3A     | 0.833674 | 2.01E-05 | 0.002057 | 4.26337  | Up | rabphilin 3A                                            |
| ABCC11    | 0.832149 | 0.001053 | 0.022749 | 3.2761   | Up | ATP binding cassette subfamily C member 11              |
| CHRM4     | 0.831926 | 2.96E-05 | 0.00259  | 4.176849 | Up | cholinergic receptor muscarinic 4                       |
| CHRM1     | 0.830727 | 2.92E-06 | 0.000596 | 4.676226 | Up | cholinergic receptor muscarinic 1                       |
| MUC6      | 0.827797 | 0.000358 | 0.012179 | 3.569356 | Up | mucin 6, oligomeric mucus/gel-forming                   |
| TUBB2A    | 0.826965 | 4.49E-06 | 0.00077  | 4.587124 | Up | tubulin beta 2A class IIa                               |
| GRM2      | 0.825072 | 1.67E-06 | 0.000406 | 4.790128 | Up | glutamate metabotropic receptor 2                       |
| SYT5      | 0.824591 | 4.32E-06 | 0.000752 | 4.595506 | Up | synaptotagmin 5                                         |
| IQCN      | 0.823133 | 0.003026 | 0.042573 | 2.965037 | Up | IQ motif containing N                                   |
| LINC02774 | 0.823064 | 0.00021  | 0.008621 | 3.707149 | Up | long intergenic non-protein coding RNA 2774             |
| DCAF12L2  | 0.822565 | 0.003043 | 0.042738 | 2.963376 | Up | DDB1 and CUL4 associated factor 12 like 2               |
| BAIAP3    | 0.816895 | 0.000536 | 0.015074 | 3.462163 | Up | BAI1 associated protein 3                               |
| FAM163B   | 0.816308 | 0.00206  | 0.033974 | 3.081397 | Up | family with sequence similarity 163 member B            |
| MIR770    | 0.806941 | 3.76E-05 | 0.00295  | 4.121647 | Up | microRNA 770                                            |
| ABCC12    | 0.806531 | 0.001094 | 0.023229 | 3.265132 | Up | ATP binding cassette subfamily C member 12              |
| OPRL1     | 0.804213 | 0.000131 | 0.006397 | 3.823901 | Up | opioid related nociceptin receptor 1                    |
| OVOL2     | 0.798974 | 0.001699 | 0.030356 | 3.138353 | Up | ovo like zinc finger 2                                  |
| SPINT2    | 0.795394 | 0.00048  | 0.0143   | 3.49166  | Up | serine peptidase inhibitor, Kunitz type 2               |
| LBH       | 0.794958 | 0.000563 | 0.015483 | 3.448694 | Up | LBH regulator of WNT signaling pathway                  |
| EFNB3     | 0.792388 | 1.32E-08 | 2.14E-05 | 5.682967 | Up | ephrin B3                                               |
| CCK       | 0.791473 | 0.000129 | 0.006316 | 3.828522 | Up | cholecystokinin                                         |
| MYOZ3     | 0.791347 | 1.61E-05 | 0.001828 | 4.3125   | Up | myozenin 3                                              |
| HSPBP1    | 0.788878 | 0.000165 | 0.007361 | 3.767237 | Up | HSPA (Hsp70) binding protein 1                          |
| SLC22A17  | 0.786538 | 0.000164 | 0.00732  | 3.769456 | Up | solute carrier family 22 member 17                      |
| FAM86JP   | 0.785682 | 0.003691 | 0.048039 | 2.903438 | Up | family with sequence similarity 86, member A pseudogene |
| HAS1      | 0.784851 | 0.001756 | 0.030918 | 3.128622 | Up | hyaluronan synthase 1                                   |
| DIRAS1    | 0.783633 | 3.76E-05 | 0.00295  | 4.121518 | Up | DIRAS family GTPase 1                                   |
| ERFE      | 0.78283  | 0.003612 | 0.04751  | 2.910189 | Up | erythroferrone                                          |
| HPCA      | 0.781831 | 6.02E-06 | 0.000931 | 4.525658 | Up | hippocalcin                                             |
| TRIM54    | 0.781588 | 0.001968 | 0.03318  | 3.094966 | Up | tripartite motif containing 54                          |
| LRRC73    | 0.779696 | 0.001789 | 0.03122  | 3.12314  | Up | leucine rich repeat containing 73                       |
| GNG13     | 0.775401 | 0.002161 | 0.035044 | 3.067114 | Up | G protein subunit gamma 13                              |
| CDK5R2    | 0.774199 | 0.00074  | 0.018434 | 3.374202 | Up | cyclin dependent kinase 5 regulatory subunit 2          |
| SLC1A6    | 0.773261 | 0.000217 | 0.008825 | 3.698569 | Up | solute carrier family 1 member 6                        |
| RCOR2     | 0.77228  | 2.14E-05 | 0.002159 | 4.249513 | Up | REST corepressor 2                                      |
| PNMA8B    | 0.769131 | 7.78E-06 | 0.001105 | 4.471232 | Up | PNMA family member 8B                                   |

|              |          |          |          |          |    |                                                                                |
|--------------|----------|----------|----------|----------|----|--------------------------------------------------------------------------------|
| GALNT17      | 0.767281 | 6.19E-07 | 0.000192 | 4.985139 | Up | polypeptide N-acetylgalactosaminyltransferase 17                               |
| ADAMTSL1     | 0.766708 | 7.83E-05 | 0.004603 | 3.949415 | Up | ADAMTS like 1                                                                  |
| LINC01852    | 0.762329 | 0.000813 | 0.019577 | 3.348249 | Up | long intergenic non-protein coding RNA 1852                                    |
| CPNE6        | 0.757645 | 3.48E-08 | 3.42E-05 | 5.515443 | Up | copine 6                                                                       |
| ARF5         | 0.752545 | 9.58E-07 | 0.000278 | 4.900011 | Up | ADP ribosylation factor 5                                                      |
| ARHGDI3      | 0.751133 | 0.003455 | 0.04616  | 2.924035 | Up | Rho GDP dissociation inhibitor gamma                                           |
| MAL2         | 0.750925 | 0.00053  | 0.015013 | 3.464923 | Up | mal, T cell differentiation protein 2                                          |
| TPBGL-AS1    | 0.747725 | 0.000381 | 0.012619 | 3.553134 | Up | TPBGL antisense RNA 1                                                          |
| FBLL1        | 0.747278 | 0.000964 | 0.021756 | 3.300864 | Up | fibrillarin like 1                                                             |
| COX8A        | 0.745665 | 0.000818 | 0.01963  | 3.346764 | Up | cytochrome c oxidase subunit 8A                                                |
| RASL10A      | 0.745457 | 1.43E-06 | 0.000361 | 4.821    | Up | RAS like family 10 member A                                                    |
| CALHM1       | 0.742023 | 6.42E-05 | 0.004097 | 3.996832 | Up | calcium homeostasis modulator 1                                                |
| SLC7A4       | 0.741065 | 0.000514 | 0.014807 | 3.473391 | Up | solute carrier family 7 member 4                                               |
| KCNK3        | 0.73989  | 0.001144 | 0.023891 | 3.252387 | Up | potassium two pore domain channel subfamily K member 3                         |
| SEZ6L2       | 0.739852 | 1.21E-05 | 0.001502 | 4.375493 | Up | seizure related 6 homolog like 2                                               |
| GOLGA8B      | 0.737827 | 0.002345 | 0.036803 | 3.042688 | Up | golgin A8 family member B                                                      |
| MRPS12       | 0.73683  | 0.001616 | 0.029479 | 3.153064 | Up | mitochondrial ribosomal protein S12                                            |
| IL1RAPL2     | 0.736053 | 0.000358 | 0.012179 | 3.569293 | Up | interleukin 1 receptor accessory protein like 2                                |
| SLC6A17      | 0.735556 | 1.00E-05 | 0.001308 | 4.416511 | Up | solute carrier family 6 member 17                                              |
| SLC22A24     | 0.730974 | 0.003683 | 0.047996 | 2.904107 | Up | solute carrier family 22 member 24                                             |
| PGLYRP1      | 0.728015 | 0.002952 | 0.041993 | 2.972729 | Up | peptidoglycan recognition protein 1                                            |
| IQANK1       | 0.727277 | 0.002092 | 0.034362 | 3.076802 | Up | IQ motif and ankyrin repeat containing 1                                       |
| EXOSC5       | 0.726211 | 3.69E-05 | 0.00293  | 4.126362 | Up | exosome component 5                                                            |
| GPCPD1       | 0.725569 | 0.00023  | 0.009154 | 3.6833   | Up | glycerophosphocholine phosphodiesterase 1                                      |
| DNAJC5G      | 0.723975 | 0.001741 | 0.030779 | 3.131264 | Up | DnaJ heat shock protein family (Hsp40) member C5 gamma                         |
| INSM1        | 0.721321 | 0.001391 | 0.026924 | 3.196419 | Up | INSM transcriptional repressor 1                                               |
| SLC6A7       | 0.721028 | 3.44E-05 | 0.002819 | 4.142033 | Up | solute carrier family 6 member 7                                               |
| WNT10B       | 0.718075 | 0.000183 | 0.007881 | 3.741741 | Up | Wnt family member 10B                                                          |
| NPTX2        | 0.716495 | 0.003448 | 0.046123 | 2.924676 | Up | neuronal pentraxin 2                                                           |
| SYT13        | 0.715331 | 1.59E-05 | 0.001816 | 4.315361 | Up | synaptotagmin 13                                                               |
| LOC101927531 | 0.715119 | 0.000304 | 0.010996 | 3.611807 | Up | uncharacterized LOC101927531                                                   |
| PCDHAC2      | 0.713742 | 4.13E-06 | 0.000739 | 4.6047   | Up | protocadherin alpha subfamily C, 2                                             |
| CDH22        | 0.713176 | 0.003097 | 0.043303 | 2.957917 | Up | cadherin 22                                                                    |
| SLC45A1      | 0.712508 | 0.000665 | 0.017076 | 3.403538 | Up | solute carrier family 45 member 1                                              |
| SMIM10L2B    | 0.712121 | 2.63E-05 | 0.002373 | 4.20344  | Up | small integral membrane protein 10 like 2B                                     |
| KLHL25       | 0.7114   | 0.001375 | 0.026829 | 3.199884 | Up | kelch like family member 25                                                    |
| SLC8A2       | 0.711308 | 3.60E-05 | 0.002896 | 4.131753 | Up | solute carrier family 8 member A2                                              |
| PRMT8        | 0.708775 | 2.41E-05 | 0.002275 | 4.223027 | Up | protein arginine methyltransferase 8                                           |
| GPR88        | 0.705119 | 0.001332 | 0.026315 | 3.208938 | Up | G protein-coupled receptor 88                                                  |
| ELFN2        | 0.70333  | 0.000279 | 0.010367 | 3.634355 | Up | extracellular leucine rich repeat and fibronectin type III domain containing 2 |
| IGSF3        | 0.702883 | 0.000482 | 0.014319 | 3.490622 | Up | immunoglobulin superfamily member 3                                            |



|           |          |          |          |          |    |                                                        |
|-----------|----------|----------|----------|----------|----|--------------------------------------------------------|
| TUBA1B    | 0.702813 | 0.000797 | 0.019313 | 3.353705 | Up | tubulin alpha 1b                                       |
| PSMG3     | 0.701566 | 0.000101 | 0.005414 | 3.888517 | Up | proteasome assembly chaperone 3                        |
| SPRY4-AS1 | 0.701413 | 0.001084 | 0.023103 | 3.26777  | Up | SPRY4 antisense RNA 1                                  |
| VWA5B2    | 0.699677 | 0.0028   | 0.040854 | 2.988847 | Up | von Willebrand factor A domain containing 5B2          |
| MARCHF4   | 0.696914 | 4.05E-06 | 0.000738 | 4.608688 | Up | membrane associated ring-CH-type finger 4              |
| NSG2      | 0.695107 | 4.77E-05 | 0.003461 | 4.066774 | Up | neuronal vesicle trafficking associated 2              |
| NPTXR     | 0.694381 | 7.37E-05 | 0.004447 | 3.964061 | Up | neuronal pentraxin receptor                            |
| STUM      | 0.692895 | 0.000182 | 0.007858 | 3.742894 | Up | stum, mechanosensory transduction mediator homolog     |
| HIPK4     | 0.692477 | 0.003623 | 0.047557 | 2.90922  | Up | homeodomain interacting protein kinase 4               |
| RGS4      | 0.69105  | 0.00061  | 0.016083 | 3.42694  | Up | regulator of G protein signaling 4                     |
| SEZ6      | 0.688386 | 3.64E-07 | 0.00013  | 5.086728 | Up | seizure related 6 homolog                              |
| GUSBP5    | 0.687454 | 0.003388 | 0.045578 | 2.930135 | Up | GUSB pseudogene 5                                      |
| CACNB1    | 0.686313 | 8.13E-06 | 0.00113  | 4.461619 | Up | calcium voltage-gated channel auxiliary subunit beta 1 |
| H2AC21    | 0.685202 | 0.000306 | 0.011024 | 3.610526 | Up | H2A clustered histone 21                               |
| NGEF      | 0.68419  | 4.76E-06 | 0.000799 | 4.575213 | Up | neuronal guanine nucleotide exchange factor            |
| DOC2A     | 0.684045 | 8.18E-05 | 0.004711 | 3.939051 | Up | double C2 domain alpha                                 |
| USP11     | 0.682506 | 2.28E-08 | 2.73E-05 | 5.58935  | Up | ubiquitin specific peptidase 11                        |
| PLK2      | 0.679706 | 3.21E-05 | 0.002719 | 4.157774 | Up | polo like kinase 2                                     |
| TMEM121B  | 0.679167 | 8.25E-07 | 0.000244 | 4.929298 | Up | transmembrane protein 121B                             |
| INTS5     | 0.677933 | 0.00138  | 0.026881 | 3.19882  | Up | integrator complex subunit 5                           |
| SCN3B     | 0.676599 | 2.57E-06 | 0.000545 | 4.702124 | Up | sodium voltage-gated channel beta subunit 3            |
| CAMKV     | 0.676166 | 1.51E-06 | 0.000374 | 4.810257 | Up | CaM kinase like vesicle associated                     |
| PLD3      | 0.675655 | 0.000307 | 0.011054 | 3.609378 | Up | phospholipase D family member 3                        |
| CYS1      | 0.674066 | 0.001363 | 0.026672 | 3.202387 | Up | cystin 1                                               |
| NPM3      | 0.673765 | 0.000204 | 0.008482 | 3.713911 | Up | nucleophosmin/nucleoplasm 3                            |
| PER2      | 0.673499 | 3.02E-05 | 0.002625 | 4.171985 | Up | period circadian regulator 2                           |
| EXTL1     | 0.672999 | 0.000845 | 0.020033 | 3.337759 | Up | exostosin like glycosyltransferase 1                   |
| SMIM10L2A | 0.672892 | 2.30E-05 | 0.002224 | 4.233981 | Up | small integral membrane protein 10 like 2A             |
| RNF165    | 0.672744 | 1.61E-09 | 6.14E-06 | 6.03323  | Up | ring finger protein 165                                |
| SLC26A10  | 0.670661 | 0.001998 | 0.033378 | 3.090535 | Up | solute carrier family 26 member 10                     |
| PYCR3     | 0.670446 | 0.001408 | 0.027164 | 3.193042 | Up | pyrroline-5-carboxylate reductase 3                    |
| ECRG4     | 0.669705 | 0.001477 | 0.028041 | 3.179068 | Up | ECRG4 augurin precursor                                |
| ZNF843    | 0.669329 | 0.002869 | 0.041444 | 2.9814   | Up | zinc finger protein 843                                |
| IL1RL2    | 0.667346 | 0.002248 | 0.035946 | 3.055298 | Up | interleukin 1 receptor like 2                          |
| NUAK1     | 0.666452 | 1.96E-07 | 9.17E-05 | 5.203046 | Up | NUAK family kinase 1                                   |
| LINGO1    | 0.665604 | 0.000345 | 0.011881 | 3.578594 | Up | leucine rich repeat and Ig domain containing 1         |
| OPN3      | 0.665526 | 0.000696 | 0.017674 | 3.391285 | Up | opsin 3                                                |
| FXYP7     | 0.664062 | 0.000433 | 0.013489 | 3.518977 | Up | FXYP domain containing ion transport regulator 7       |
| TIMM13    | 0.66333  | 0.001988 | 0.03328  | 3.091952 | Up | translocase of inner mitochondrial membrane 13         |
| TAGLN3    | 0.66322  | 0.000158 | 0.007185 | 3.778598 | Up | transgelin 3                                           |
| FAM83H    | 0.66238  | 0.002036 | 0.033747 | 3.084998 | Up | family with sequence similarity 83 member H            |

|           |          |          |          |          |    |                                                         |
|-----------|----------|----------|----------|----------|----|---------------------------------------------------------|
| CAMKK2    | 0.662207 | 8.37E-06 | 0.001151 | 4.455606 | Up | calcium/calmodulin dependent protein kinase kinase 2    |
| RHBDD2    | 0.661935 | 0.000323 | 0.011415 | 3.596229 | Up | rhomboid domain containing 2                            |
| RTL8C     | 0.661341 | 0.000524 | 0.014965 | 3.467967 | Up | retrotransposon Gag like 8C                             |
| CLSTN3    | 0.661263 | 3.12E-05 | 0.002668 | 4.164495 | Up | calsyntenin 3                                           |
| LZTS1     | 0.660794 | 0.00046  | 0.013961 | 3.502917 | Up | leucine zipper tumor suppressor 1                       |
| ASMTL     | 0.658189 | 4.50E-06 | 0.00077  | 4.586643 | Up | acetylserotonin O-methyltransferase like                |
| SYT12     | 0.657803 | 7.41E-05 | 0.00445  | 3.962805 | Up | synaptotagmin 12                                        |
| PAK6      | 0.65675  | 0.00023  | 0.009154 | 3.683477 | Up | p21 (RAC1) activated kinase 6                           |
| LYRM9     | 0.656544 | 0.000141 | 0.006744 | 3.806235 | Up | LYR motif containing 9                                  |
| ENO2      | 0.655341 | 4.74E-05 | 0.003458 | 4.068169 | Up | enolase 2                                               |
| DCTPP1    | 0.654944 | 0.000891 | 0.020803 | 3.322974 | Up | dCTP pyrophosphatase 1                                  |
| RBM3      | 0.654476 | 0.003382 | 0.045551 | 2.930681 | Up | RNA binding motif protein 3                             |
| CHCHD2    | 0.653998 | 3.13E-06 | 0.00062  | 4.662194 | Up | coiled-coil-helix-coiled-coil-helix domain containing 2 |
| SPRYD3    | 0.650124 | 5.26E-06 | 0.000851 | 4.55414  | Up | SPRY domain containing 3                                |
| KCNIP3    | 0.648476 | 0.000541 | 0.015092 | 3.459506 | Up | potassium voltage-gated channel interacting protein 3   |
| SYP       | 0.647508 | 1.14E-05 | 0.00144  | 4.388625 | Up | synaptophysin                                           |
| HPCAL1    | 0.646778 | 0.000649 | 0.016826 | 3.410186 | Up | hippocalcin like 1                                      |
| ATP6V0E2  | 0.646404 | 0.000115 | 0.005894 | 3.856466 | Up | ATPase H+ transporting V0 subunit e2                    |
| C17orf107 | 0.646091 | 0.000384 | 0.012692 | 3.55099  | Up | chromosome 17 open reading frame 107                    |
| STOML1    | 0.645355 | 0.000486 | 0.014399 | 3.488589 | Up | stomatin like 1                                         |
| IGSF8     | 0.644994 | 0.001726 | 0.030613 | 3.133796 | Up | immunoglobulin superfamily member 8                     |
| PAK1      | 0.6446   | 8.58E-05 | 0.00488  | 3.927526 | Up | p21 (RAC1) activated kinase 1                           |
| ST6GAL2   | 0.64444  | 2.44E-05 | 0.002287 | 4.219959 | Up | ST6 beta-galactoside alpha-2,6-sialyltransferase 2      |
| PNCK      | 0.6433   | 0.002253 | 0.035955 | 3.054701 | Up | pregnancy up-regulated nonubiquitous CaM kinase         |
| SCN2B     | 0.643055 | 2.00E-05 | 0.002057 | 4.265334 | Up | sodium voltage-gated channel beta subunit 2             |
| CORO1A    | 0.642552 | 0.000993 | 0.022057 | 3.292434 | Up | coronin 1A                                              |
| SYNGR3    | 0.642483 | 0.000342 | 0.011867 | 3.581276 | Up | synaptogyrin 3                                          |
| PCDH1     | 0.642386 | 8.94E-07 | 0.000262 | 4.913608 | Up | protocadherin 1                                         |
| POP7      | 0.642121 | 0.000667 | 0.017076 | 3.40291  | Up | POP7 homolog, ribonuclease P/MRP subunit                |
| TRIM67    | 0.641558 | 0.000952 | 0.021622 | 3.304215 | Up | tripartite motif containing 67                          |
| PPP1R14C  | 0.640426 | 0.000164 | 0.00732  | 3.769433 | Up | protein phosphatase 1 regulatory inhibitor subunit 14C  |
| DLK2      | 0.639578 | 0.001207 | 0.024751 | 3.237222 | Up | delta like non-canonical Notch ligand 2                 |
| PIGZ      | 0.635922 | 1.27E-05 | 0.001547 | 4.365041 | Up | phosphatidylinositol glycan anchor biosynthesis class Z |
| NRSN1     | 0.635858 | 9.97E-05 | 0.0054   | 3.891254 | Up | neurensin 1                                             |
| NAT14     | 0.633433 | 0.002358 | 0.036899 | 3.04105  | Up | N-acetyltransferase 14 (putative)                       |
| CCNA1     | 0.633374 | 0.002938 | 0.041978 | 2.974174 | Up | cyclin A1                                               |
| ADGRB2    | 0.633335 | 0.002806 | 0.040879 | 2.988175 | Up | adhesion G protein-coupled receptor B2                  |
| CIRBP     | 0.633167 | 0.002021 | 0.033557 | 3.087148 | Up | cold inducible RNA binding protein                      |
| TMIE      | 0.632303 | 0.002008 | 0.033447 | 3.089019 | Up | transmembrane inner ear                                 |
| TBCC      | 0.632039 | 2.88E-05 | 0.002531 | 4.182841 | Up | tubulin folding cofactor C                              |
| RHOBTB2   | 0.631338 | 3.04E-05 | 0.002625 | 4.170476 | Up | Rho related BTB domain containing 2                     |

|           |          |          |          |          |    |                                                                                                |
|-----------|----------|----------|----------|----------|----|------------------------------------------------------------------------------------------------|
| TMEM38A   | 0.630823 | 3.55E-05 | 0.002875 | 4.135105 | Up | transmembrane protein 38A                                                                      |
| VAMP2     | 0.630349 | 1.22E-06 | 0.000326 | 4.852353 | Up | vesicle associated membrane protein 2                                                          |
| STMN3     | 0.630257 | 0.002968 | 0.04208  | 2.970986 | Up | stathmin 3                                                                                     |
| ATP1A3    | 0.630237 | 0.000991 | 0.022042 | 3.292943 | Up | ATPase Na <sup>+</sup> /K <sup>+</sup> transporting subunit alpha 3                            |
| NSG1      | 0.629552 | 0.00068  | 0.01736  | 3.397454 | Up | neuronal vesicle trafficking associated 1 potassium voltage-gated channel subfamily B member 2 |
| KCNB2     | 0.6271   | 2.21E-05 | 0.002185 | 4.24216  | Up |                                                                                                |
| NLRP1     | 0.62667  | 0.000976 | 0.021884 | 3.29739  | Up | NLR family pyrin domain containing 1                                                           |
| TUBA4A    | 0.626034 | 0.000629 | 0.016441 | 3.418969 | Up | tubulin alpha 4a                                                                               |
| PTPN3     | 0.625855 | 6.03E-05 | 0.003997 | 4.011688 | Up | protein tyrosine phosphatase non-receptor type 3                                               |
| TENM2     | 0.625289 | 3.43E-05 | 0.002814 | 4.143087 | Up | teneurin transmembrane protein 2                                                               |
| PCDH19    | 0.62376  | 0.001579 | 0.029104 | 3.159716 | Up | protocadherin 19                                                                               |
| NMNAT2    | 0.623416 | 3.58E-06 | 0.000686 | 4.634428 | Up | nicotinamide nucleotide adenylyltransferase 2                                                  |
| RIMS3     | 0.623123 | 6.45E-05 | 0.004097 | 3.995805 | Up | regulating synaptic membrane exocytosis 3                                                      |
| NRN1      | 0.623104 | 0.002649 | 0.039607 | 3.00582  | Up | neurtin 1                                                                                      |
| SV2A      | 0.623085 | 1.68E-05 | 0.001876 | 4.303091 | Up | synaptic vesicle glycoprotein 2A calcium/calmodulin dependent protein kinase IV                |
| CAMK4     | 0.622566 | 0.000412 | 0.013274 | 3.532277 | Up |                                                                                                |
| COPS7A    | 0.622008 | 3.34E-05 | 0.002779 | 4.149115 | Up | COP9 signalosome subunit 7A                                                                    |
| UNC5D     | 0.621766 | 2.23E-05 | 0.002186 | 4.240741 | Up | unc-5 netrin receptor D                                                                        |
| HR        | 0.62154  | 0.002581 | 0.038945 | 3.013632 | Up | HR lysine demethylase and nuclear receptor corepressor                                         |
| SHISAL1   | 0.621252 | 6.95E-06 | 0.001029 | 4.495065 | Up | shisa like 1                                                                                   |
| ATP6V0B   | 0.620476 | 0.001433 | 0.027526 | 3.188004 | Up | ATPase H <sup>+</sup> transporting V0 subunit b                                                |
| PNMA3     | 0.619918 | 0.000206 | 0.00855  | 3.711134 | Up | PNMA family member 3                                                                           |
| C1orf115  | 0.618116 | 4.34E-05 | 0.003272 | 4.088554 | Up | chromosome 1 open reading frame 115                                                            |
| FLJ33534  | 0.617924 | 0.003139 | 0.043598 | 2.953769 | Up | uncharacterized LOC285150                                                                      |
| VIPR1     | 0.614155 | 5.35E-07 | 0.000177 | 5.013206 | Up | vasoactive intestinal peptide receptor 1 protein phosphatase 2 scaffold subunit Aalpha         |
| PPP2R1A   | 0.613768 | 0.000244 | 0.009491 | 3.668319 | Up |                                                                                                |
| LAMB3     | 0.611764 | 0.001681 | 0.030087 | 3.141529 | Up | laminin subunit beta 3                                                                         |
| MEG9      | 0.61146  | 0.001654 | 0.029823 | 3.146289 | Up | maternally expressed 9 calcium voltage-gated channel auxiliary subunit gamma 3                 |
| CACNG3    | 0.611001 | 1.50E-05 | 0.001737 | 4.329255 | Up |                                                                                                |
| BAIAP2-DT | 0.610293 | 1.13E-05 | 0.001434 | 4.390522 | Up | BAIAP2 divergent transcript                                                                    |
| PRKCG     | 0.609658 | 0.001206 | 0.024751 | 3.237449 | Up | protein kinase C gamma                                                                         |
| BFSP1     | 0.609396 | 0.000224 | 0.008988 | 3.690554 | Up | beaded filament structural protein 1                                                           |
| MEF2D     | 0.606269 | 6.74E-08 | 5.15E-05 | 5.397881 | Up | myocyte enhancer factor 2D                                                                     |
| DNAL4     | 0.605999 | 2.41E-05 | 0.002275 | 4.222628 | Up | dynein axonemal light chain 4                                                                  |
| TRIB3     | 0.605755 | 0.001122 | 0.02356  | 3.258079 | Up | tribbles pseudokinase 3                                                                        |
| RAB40C    | 0.604893 | 0.003641 | 0.047664 | 2.907676 | Up | RAB40C, member RAS oncogene family                                                             |
| EMD       | 0.601995 | 0.0005   | 0.014605 | 3.480747 | Up | emerin                                                                                         |
| SULT4A1   | 0.601165 | 0.000401 | 0.01304  | 3.539695 | Up | sulfotransferase family 4A member 1 family with sequence similarity 131 member A               |
| FAM131A   | 0.600311 | 2.56E-05 | 0.002346 | 4.209238 | Up |                                                                                                |
| CX3CL1    | 0.599497 | 0.000207 | 0.008554 | 3.710645 | Up | C-X3-C motif chemokine ligand 1                                                                |
| PRKAR1B   | 0.597876 | 0.000537 | 0.015074 | 3.461641 | Up | protein kinase cAMP-dependent type I regulatory subunit beta                                   |

|            |          |          |          |          |    |                                                                                      |
|------------|----------|----------|----------|----------|----|--------------------------------------------------------------------------------------|
| NBL1       | 0.597287 | 0.000242 | 0.009453 | 3.671087 | Up | NBL1, DAN family BMP antagonist                                                      |
| CA10       | 0.594811 | 0.000868 | 0.02041  | 3.330142 | Up | carbonic anhydrase 10                                                                |
| ENC1       | 0.594616 | 0.000124 | 0.006135 | 3.838121 | Up | ectodermal-neural cortex 1                                                           |
| VSTM5      | 0.594469 | 0.000167 | 0.007396 | 3.764855 | Up | V-set and transmembrane domain containing 5                                          |
| NRSN2      | 0.593309 | 3.98E-05 | 0.003093 | 4.108674 | Up | neurensin 2                                                                          |
| PARM1      | 0.593043 | 0.000798 | 0.019321 | 3.353347 | Up | prostate androgen-regulated mucin-like protein 1                                     |
| FNDC5      | 0.592705 | 0.000123 | 0.006115 | 3.839376 | Up | fibronectin type III domain containing 5                                             |
| CLCA4-AS1  | 0.592668 | 0.000464 | 0.014026 | 3.500632 | Up | CLCA4 antisense RNA 1                                                                |
| KLHL26     | 0.591733 | 0.003862 | 0.049477 | 2.889178 | Up | kelch like family member 26                                                          |
| MN1        | 0.591269 | 0.001017 | 0.022363 | 3.285848 | Up | MN1 proto-oncogene, transcriptional regulator                                        |
| ADRA1B     | 0.59109  | 0.001072 | 0.022962 | 3.270814 | Up | adrenoceptor alpha 1B                                                                |
| NDUFA4     | 0.590831 | 0.000401 | 0.01304  | 3.539444 | Up | NDUFA4 mitochondrial complex associated                                              |
| ATP2B1-AS1 | 0.590095 | 0.001336 | 0.026326 | 3.208062 | Up | ATP2B1 antisense RNA 1                                                               |
| MICOS13    | 0.588719 | 0.002569 | 0.038862 | 3.015075 | Up | mitochondrial contact site and cristae organizing system subunit 13                  |
| ATP6V1B2   | 0.584358 | 0.000316 | 0.011233 | 3.601498 | Up | ATPase H+ transporting V1 subunit B2                                                 |
| CDH13      | 0.584249 | 0.001336 | 0.026326 | 3.208071 | Up | cadherin 13                                                                          |
| GNG4       | 0.583564 | 1.48E-05 | 0.001721 | 4.332212 | Up | G protein subunit gamma 4                                                            |
| EFR3B      | 0.582314 | 5.26E-05 | 0.003722 | 4.043684 | Up | EFR3 homolog B                                                                       |
| CNTNAP2    | 0.581828 | 0.000394 | 0.012919 | 3.544118 | Up | contactin associated protein 2                                                       |
| SPIN2B     | 0.579472 | 0.000374 | 0.012428 | 3.558105 | Up | spindlin family member 2B                                                            |
| GGT7       | 0.579166 | 0.001134 | 0.023749 | 3.254946 | Up | gamma-glutamyltransferase 7                                                          |
| CAMK1      | 0.578944 | 0.001382 | 0.026881 | 3.198379 | Up | calcium/calmodulin dependent protein kinase I                                        |
| ETV5       | 0.577556 | 0.00176  | 0.03096  | 3.128034 | Up | ETS variant transcription factor 5                                                   |
| FLRT1      | 0.577462 | 0.0024   | 0.03727  | 3.035678 | Up | fibronectin leucine rich transmembrane protein 1                                     |
| KIF17      | 0.576033 | 0.000158 | 0.007197 | 3.777749 | Up | kinesin family member 17                                                             |
| RAB36      | 0.57552  | 6.83E-05 | 0.004226 | 3.981992 | Up | RAB36, member RAS oncogene family signal transducer and activator of transcription 4 |
| STAT4      | 0.575097 | 0.00093  | 0.021351 | 3.310765 | Up | transcription 4                                                                      |
| CALM3      | 0.574971 | 0.000342 | 0.011867 | 3.581292 | Up | calmodulin 3                                                                         |
| SLC12A5    | 0.574925 | 0.000795 | 0.019294 | 3.354481 | Up | solute carrier family 12 member 5                                                    |
| NRIP3      | 0.574464 | 0.002189 | 0.035375 | 3.063252 | Up | nuclear receptor interacting protein 3                                               |
| NIPSNAP1   | 0.573253 | 0.000187 | 0.008009 | 3.735356 | Up | nipsnap homolog 1                                                                    |
| PIN1       | 0.572929 | 0.000532 | 0.015024 | 3.464097 | Up | peptidylprolyl cis/trans isomerase, NIMA-interacting 1                               |
| PHYHIP     | 0.572383 | 0.003333 | 0.045227 | 2.935187 | Up | phytanoyl-CoA 2-hydroxylase interacting protein                                      |
| ATP5MC1    | 0.571539 | 0.000784 | 0.019099 | 3.358505 | Up | ATP synthase membrane subunit c locus 1                                              |
| C11orf87   | 0.570198 | 0.000371 | 0.012399 | 3.559702 | Up | chromosome 11 open reading frame 87                                                  |
| ARF3       | 0.569953 | 2.06E-06 | 0.000479 | 4.747897 | Up | ADP ribosylation factor 3                                                            |
| ATP5F1B    | 0.569352 | 0.00045  | 0.013741 | 3.508912 | Up | ATP synthase F1 subunit beta                                                         |
| CDH8       | 0.56886  | 0.000685 | 0.017432 | 3.395572 | Up | cadherin 8                                                                           |
| PTPRN      | 0.568466 | 0.000814 | 0.019587 | 3.347861 | Up | protein tyrosine phosphatase receptor type N                                         |
| C3orf80    | 0.568119 | 0.002463 | 0.037894 | 3.027826 | Up | chromosome 3 open reading frame 80                                                   |
| HSD11B1L   | 0.567059 | 0.001777 | 0.031151 | 3.125094 | Up | hydroxysteroid 11-beta dehydrogenase 1 like                                          |

|           |          |          |          |          |    |                                                                 |
|-----------|----------|----------|----------|----------|----|-----------------------------------------------------------------|
| PCDHGC4   | 0.566825 | 1.08E-05 | 0.00138  | 4.400827 | Up | protocadherin gamma subfamily C, 4                              |
| SCAMP5    | 0.566451 | 0.000568 | 0.015575 | 3.446565 | Up | secretory carrier membrane protein 5                            |
| SATB2-AS1 | 0.566214 | 6.35E-05 | 0.004086 | 3.99943  | Up | SATB2 antisense RNA 1                                           |
| DDX28     | 0.566055 | 0.00381  | 0.049004 | 2.893516 | Up | DEAD-box helicase 28                                            |
| SYT16     | 0.565556 | 0.000156 | 0.007138 | 3.781458 | Up | synaptotagmin 16                                                |
| HINT1     | 0.564742 | 0.000244 | 0.009491 | 3.668672 | Up | histidine triad nucleotide binding protein 1                    |
| CYC1      | 0.564287 | 0.003586 | 0.047276 | 2.912466 | Up | cytochrome c1                                                   |
| NAA80     | 0.562087 | 0.001467 | 0.027995 | 3.181115 | Up | N-alpha-acetyltransferase 80, NatH catalytic subunit            |
| YIF1B     | 0.562073 | 0.003136 | 0.043598 | 2.954102 | Up | Yip1 interacting factor homolog B, membrane trafficking protein |
| NECTIN1   | 0.56181  | 0.000666 | 0.017076 | 3.403301 | Up | nectin cell adhesion molecule 1                                 |
| ACOT7     | 0.561622 | 0.000715 | 0.017971 | 3.383686 | Up | acyl-CoA thioesterase 7                                         |
| PGAP3     | 0.561312 | 0.000474 | 0.014191 | 3.495314 | Up | post-GPI attachment to proteins phospholipase 3                 |
| ARSG      | 0.560845 | 5.61E-06 | 0.000892 | 4.540598 | Up | arylsulfatase G                                                 |
| GAS7      | 0.56032  | 1.31E-07 | 7.33E-05 | 5.278071 | Up | growth arrest specific 7                                        |
| PIM2      | 0.559592 | 0.000752 | 0.018661 | 3.369836 | Up | Pim-2 proto-oncogene, serine/threonine kinase                   |
| EOLA2     | 0.558484 | 0.000287 | 0.010556 | 3.626787 | Up | endothelium and lymphocyte associated ASCH domain 2             |
| H4C3      | 0.55825  | 0.00294  | 0.041978 | 2.973952 | Up | H4 clustered histone 3                                          |
| NDN       | 0.558194 | 0.000213 | 0.008711 | 3.703379 | Up | necdin, MAGE family member                                      |
| PODXL2    | 0.557048 | 0.001268 | 0.025485 | 3.223131 | Up | podocalyxin like 2                                              |
| IER5      | 0.556778 | 0.002226 | 0.035715 | 3.058279 | Up | immediate early response 5                                      |
| TSPYL5    | 0.556176 | 4.76E-06 | 0.000799 | 4.574983 | Up | TSPY like 5                                                     |
| DMKN      | 0.556165 | 0.000313 | 0.011178 | 3.604409 | Up | dermokine                                                       |
| MELTF     | 0.555344 | 0.00185  | 0.031886 | 3.113384 | Up | melanotransferrin                                               |
| CDIPT     | 0.554982 | 0.002878 | 0.041525 | 2.980479 | Up | CDP-diacylglycerol--inositol 3-phosphatidyltransferase          |
| CAP2      | 0.554587 | 0.000998 | 0.02211  | 3.291084 | Up | cyclase associated actin cytoskeleton regulatory protein 2      |
| RBP2      | 0.554399 | 0.002324 | 0.036609 | 3.045307 | Up | retinol binding protein 2                                       |
| SYNGR1    | 0.554115 | 0.001295 | 0.025814 | 3.217152 | Up | synaptogyrin 1                                                  |
| AP1S1     | 0.552652 | 0.000925 | 0.021273 | 3.312492 | Up | adaptor related protein complex 1 subunit sigma 1               |
| DMTN      | 0.552086 | 0.001831 | 0.031712 | 3.116423 | Up | dematin actin binding protein                                   |
| PIANP     | 0.550773 | 0.00182  | 0.031579 | 3.118092 | Up | PILR alpha associated neural protein                            |
| CRHR1     | 0.550694 | 0.002679 | 0.039762 | 3.002326 | Up | corticotropin releasing hormone receptor 1                      |
| PPOX      | 0.548804 | 0.00029  | 0.010613 | 3.624354 | Up | protoporphyrinogen oxidase                                      |
| NTNG1     | 0.548229 | 0.001874 | 0.032169 | 3.109467 | Up | netrin G1                                                       |
| ZFR2      | 0.548113 | 0.001977 | 0.033227 | 3.093695 | Up | zinc finger RNA binding protein 2                               |
| CRY2      | 0.547983 | 2.26E-06 | 0.000515 | 4.728386 | Up | cryptochrome circadian regulator 2                              |
| SNCB      | 0.547273 | 0.001516 | 0.028437 | 3.171613 | Up | synuclein beta                                                  |
| ASS1      | 0.546931 | 0.002907 | 0.041695 | 2.977397 | Up | argininosuccinate synthase 1                                    |
| RAB3A     | 0.546661 | 0.001026 | 0.02248  | 3.28326  | Up | RAB3A, member RAS oncogene family                               |
| B4GAT1    | 0.543905 | 2.55E-05 | 0.002346 | 4.210207 | Up | beta-1,4-glucuronyltransferase 1                                |
| KATNB1    | 0.543621 | 0.002795 | 0.040794 | 2.989458 | Up | katanin regulatory subunit B1                                   |
| STXBP1    | 0.543085 | 5.92E-06 | 0.000922 | 4.529375 | Up | syntaxin binding protein 1                                      |

|           |          |          |          |          |    |                                                                                  |
|-----------|----------|----------|----------|----------|----|----------------------------------------------------------------------------------|
| SLC8A3    | 0.542718 | 8.93E-06 | 0.001204 | 4.441588 | Up | solute carrier family 8 member A3                                                |
| RNF187    | 0.542402 | 0.001711 | 0.030457 | 3.13624  | Up | ring finger protein 187                                                          |
| OTUB1     | 0.542172 | 0.000611 | 0.016083 | 3.426627 | Up | OTU deubiquitinase, ubiquitin aldehyde binding 1                                 |
| KLHDC3    | 0.542157 | 0.000345 | 0.011881 | 3.578619 | Up | kelch domain containing 3                                                        |
| CHRN2     | 0.541491 | 0.000314 | 0.011191 | 3.603464 | Up | cholinergic receptor nicotinic beta 2 subunit                                    |
| RND1      | 0.541448 | 0.00077  | 0.01891  | 3.363207 | Up | Rho family GTPase 1                                                              |
| MEX3B     | 0.541264 | 0.002197 | 0.035416 | 3.06229  | Up | mex-3 RNA binding family member B adaptor related protein complex 2 subunit mu 1 |
| AP2M1     | 0.540869 | 5.38E-05 | 0.003754 | 4.038527 | Up |                                                                                  |
| SNU13     | 0.539696 | 0.00036  | 0.012221 | 3.567648 | Up | small nuclear ribonucleoprotein 13                                               |
| PTPN5     | 0.539316 | 0.00024  | 0.009423 | 3.673178 | Up | protein tyrosine phosphatase non-receptor type 5                                 |
| ATP6AP1   | 0.539037 | 0.000627 | 0.016423 | 3.419526 | Up | ATPase H <sup>+</sup> transporting accessory protein 1                           |
| GABARAPL1 | 0.539014 | 0.000143 | 0.00676  | 3.803709 | Up | GABA type A receptor associated protein like 1                                   |
| PPL       | 0.538549 | 7.93E-05 | 0.004619 | 3.946436 | Up | periplakin                                                                       |
| PCP4L1    | 0.538368 | 0.003183 | 0.043946 | 2.949534 | Up | Purkinje cell protein 4 like 1                                                   |
| PSMB5     | 0.537933 | 0.000276 | 0.010322 | 3.636747 | Up | proteasome 20S subunit beta 5                                                    |
| SLC17A7   | 0.5365   | 0.000222 | 0.008953 | 3.692842 | Up | solute carrier family 17 member 7                                                |
| FHIP1B    | 0.536474 | 5.91E-05 | 0.003973 | 4.016568 | Up | FHF complex subunit HOOK interacting protein 1B                                  |
| NAPA      | 0.536199 | 0.000601 | 0.015989 | 3.431062 | Up | NSF attachment protein alpha                                                     |
| APBB3     | 0.536081 | 0.000835 | 0.019852 | 3.341    | Up | amyloid beta precursor protein binding family B member 3                         |
| TIMM17B   | 0.53556  | 0.001665 | 0.029949 | 3.144235 | Up | translocase of inner mitochondrial membrane 17B                                  |
| ZNF710    | 0.534718 | 0.000602 | 0.015989 | 3.430676 | Up | zinc finger protein 710                                                          |
| NELL1     | 0.534473 | 8.46E-05 | 0.004839 | 3.930994 | Up | neural EGFL like 1                                                               |
| ZMYND12   | 0.53421  | 0.003212 | 0.044162 | 2.946723 | Up | zinc finger MYND-type containing 12                                              |
| TRIM66    | 0.533979 | 2.93E-07 | 0.000116 | 5.12774  | Up | tripartite motif containing 66                                                   |
| MDH1B     | 0.532329 | 0.003014 | 0.042457 | 2.96635  | Up | malate dehydrogenase 1B                                                          |
| ARHGEF9   | 0.530615 | 3.66E-06 | 0.000686 | 4.62961  | Up | Cdc42 guanine nucleotide exchange factor 9                                       |
| CPNE7     | 0.530277 | 0.001282 | 0.025631 | 3.220031 | Up | copine 7                                                                         |
| FIBP      | 0.530223 | 0.000862 | 0.020331 | 3.332225 | Up | FGF1 intracellular binding protein                                               |
| RET       | 0.529698 | 0.002897 | 0.04168  | 2.978507 | Up | ret proto-oncogene                                                               |
| TRAPPC1   | 0.528748 | 0.000639 | 0.016635 | 3.414474 | Up | trafficking protein particle complex subunit 1                                   |
| TARBP1    | 0.527945 | 0.000992 | 0.022042 | 3.292863 | Up | TAR (HIV-1) RNA binding protein 1                                                |
| NEURL1B   | 0.527449 | 0.000241 | 0.009453 | 3.671134 | Up | neuralized E3 ubiquitin protein ligase 1B                                        |
| GPRASP2   | 0.527069 | 0.000166 | 0.007373 | 3.766433 | Up | G protein-coupled receptor associated sorting protein 2                          |
| UNC13A    | 0.526448 | 3.12E-05 | 0.002668 | 4.164346 | Up | unc-13 homolog A                                                                 |
| CD200     | 0.526385 | 0.000366 | 0.012276 | 3.563246 | Up | CD200 molecule                                                                   |
| XK        | 0.526105 | 0.001959 | 0.033081 | 3.096447 | Up | X-linked Kx blood group                                                          |
| NME1      | 0.526023 | 0.001781 | 0.031189 | 3.1245   | Up | NME/NM23 nucleoside diphosphate kinase 1                                         |
| CCDC113   | 0.525628 | 0.000129 | 0.006316 | 3.828348 | Up | coiled-coil domain containing 113                                                |
| STX1B     | 0.525556 | 0.000391 | 0.012879 | 3.545799 | Up | syntaxin 1B                                                                      |
| CDK5      | 0.524293 | 0.00155  | 0.028801 | 3.165119 | Up | cyclin dependent kinase 5                                                        |



|            |          |          |          |          |      |                                                                                 |
|------------|----------|----------|----------|----------|------|---------------------------------------------------------------------------------|
| SNRPB      | 0.523958 | 0.003581 | 0.047235 | 2.912928 | Up   | small nuclear ribonucleoprotein polypeptides B and B1                           |
| HTR5A      | 0.523892 | 0.002412 | 0.037385 | 3.034202 | Up   | 5-hydroxytryptamine receptor 5A                                                 |
| HPCAL4     | 0.523691 | 0.000361 | 0.012247 | 3.566766 | Up   | hippocalcin like 4                                                              |
| MB21D2     | 0.523677 | 0.001132 | 0.023722 | 3.255477 | Up   | Mab-21 domain containing 2                                                      |
| PEF1       | 0.522679 | 0.000118 | 0.005954 | 3.851281 | Up   | penta-EF-hand domain containing 1                                               |
| RUSF1      | 0.522283 | 0.002614 | 0.039265 | 3.009786 | Up   | RUS family member 1                                                             |
| TSPYL4     | 0.522091 | 9.78E-06 | 0.001282 | 4.421925 | Up   | TSPY like 4                                                                     |
| TMEM72-AS1 | 0.521967 | 0.0013   | 0.025872 | 3.215889 | Up   | TMEM72 antisense RNA 1                                                          |
| TSHZ3      | 0.521488 | 1.97E-05 | 0.002049 | 4.267831 | Up   | teashirt zinc finger homeobox 3                                                 |
| ACTL6B     | 0.520435 | 0.000474 | 0.014191 | 3.495051 | Up   | actin like 6B                                                                   |
| MAST3      | 0.518596 | 0.000221 | 0.008953 | 3.693246 | Up   | microtubule associated serine/threonine kinase 3                                |
| TMEM178B   | 0.518204 | 0.00019  | 0.008088 | 3.732094 | Up   | transmembrane protein 178B family with sequence similarity 234 member B         |
| FAM234B    | 0.518159 | 0.000179 | 0.007777 | 3.746666 | Up   |                                                                                 |
| FMNL1-DT   | 0.517683 | 0.000275 | 0.010296 | 3.638086 | Up   | FMNL1 divergent transcript                                                      |
| NREP       | 0.516738 | 0.000895 | 0.020895 | 3.321501 | Up   | neuronal regeneration related protein                                           |
| TMEM9      | 0.515958 | 0.000791 | 0.01922  | 3.356024 | Up   | transmembrane protein 9                                                         |
| GABRG2     | 0.51555  | 0.001582 | 0.029123 | 3.15922  | Up   | gamma-aminobutyric acid type A receptor subunit gamma2                          |
| DLG3       | 0.514437 | 6.94E-05 | 0.004254 | 3.978328 | Up   | discs large MAGUK scaffold protein 3                                            |
| CYRIA      | 0.514275 | 0.000222 | 0.008962 | 3.692053 | Up   | CYFIP related Rac1 interactor A                                                 |
| ADGRA1     | 0.513877 | 0.001969 | 0.03318  | 3.094841 | Up   | adhesion G protein-coupled receptor A1                                          |
| KCNS2      | 0.51341  | 0.000105 | 0.005584 | 3.878432 | Up   | potassium voltage-gated channel modifier subfamily S member 2                   |
| CITED2     | 0.513285 | 0.003355 | 0.045406 | 2.933199 | Up   | Cbp/p300 interacting transactivator with Glu/Asp rich carboxy-terminal domain 2 |
| TOP2A      | -5.03851 | 6.72E-06 | 0.001005 | -4.5023  | Down | DNA topoisomerase II alpha                                                      |
| DLGAP5     | -5.01203 | 1.33E-06 | 0.000346 | -4.83505 | Down | DLG associated protein 5                                                        |
| MKI67      | -4.58038 | 2.15E-07 | 9.26E-05 | -5.18551 | Down | marker of proliferation Ki-67                                                   |
| H1-5       | -4.23005 | 4.98E-06 | 0.000818 | -4.56574 | Down | H1.5 linker histone, cluster member                                             |
| CEP55      | -3.72207 | 0.000235 | 0.009291 | -3.67842 | Down | centrosomal protein 55                                                          |
| RRM2       | -3.12261 | 0.000371 | 0.012399 | -3.56012 | Down | ribonucleotide reductase regulatory subunit M2                                  |
| FAM111B    | -3.03965 | 0.000195 | 0.008246 | -3.72488 | Down | FAM111 trypsin like peptidase B                                                 |
| MTCO2P22   | -2.95644 | 2.46E-06 | 0.000528 | -4.71175 | Down | MT-CO2 pseudogene 22                                                            |
| HJURP      | -2.92605 | 6.15E-05 | 0.004026 | -4.00714 | Down | Holliday junction recognition protein                                           |
| MELK       | -2.74507 | 0.000262 | 0.009918 | -3.65041 | Down | maternal embryonic leucine zipper kinase                                        |
| NDC80      | -2.72879 | 9.38E-05 | 0.005184 | -3.90605 | Down | NDC80 kinetochore complex component                                             |
| VNN1       | -2.53963 | 3.03E-07 | 0.000116 | -5.12187 | Down | vanin 1                                                                         |
| OR7A5      | -2.42661 | 2.10E-08 | 2.73E-05 | -5.60346 | Down | olfactory receptor family 7 subfamily A member 5                                |
| BCL2A1     | -2.37195 | 8.28E-05 | 0.004757 | -3.9361  | Down | BCL2 related protein A1                                                         |
| CHI3L1     | -2.2234  | 4.64E-08 | 4.05E-05 | -5.46448 | Down | chitinase 3 like 1                                                              |
| OR7C1      | -2.1649  | 0.001309 | 0.025968 | -3.21405 | Down | olfactory receptor family 7 subfamily C member 1                                |
| ANKRD22    | -2.12449 | 0.00376  | 0.048597 | -2.8976  | Down | ankyrin repeat domain 22                                                        |
| IL9        | -2.03935 | 2.80E-05 | 0.002487 | -4.18897 | Down | interleukin 9                                                                   |
| SHISA3     | -1.98307 | 4.30E-08 | 4.05E-05 | -5.47804 | Down | shisa family member 3                                                           |

|              |          |          |          |          |      |                                                                                                   |
|--------------|----------|----------|----------|----------|------|---------------------------------------------------------------------------------------------------|
| STC1         | -1.97591 | 0.002283 | 0.036129 | -3.05067 | Down | stanniocalcin 1                                                                                   |
| ANGPT2       | -1.94047 | 1.17E-12 | 3.22E-08 | -7.10865 | Down | angiopoietin 2                                                                                    |
| KNL1         | -1.91429 | 0.000208 | 0.008598 | -3.70885 | Down | kinetochore scaffold 1                                                                            |
| MCM10        | -1.91095 | 0.000864 | 0.020359 | -3.33136 | Down | minichromosome maintenance 10 replication initiation factor                                       |
| LOC100418888 | -1.90631 | 2.57E-05 | 0.002346 | -4.20818 | Down | peptidase D pseudogene                                                                            |
| FPR2         | -1.8649  | 0.000131 | 0.006397 | -3.82406 | Down | formyl peptide receptor 2                                                                         |
| SGO1         | -1.85155 | 9.69E-09 | 2.05E-05 | -5.73615 | Down | shugoshin 1                                                                                       |
| S100A9       | -1.83066 | 0.003118 | 0.043479 | -2.95589 | Down | S100 calcium binding protein A9                                                                   |
| MPZL2        | -1.8157  | 0.000768 | 0.018865 | -3.36411 | Down | myelin protein zero like 2                                                                        |
| LINC00323    | -1.81439 | 0.000175 | 0.007635 | -3.75286 | Down | long intergenic non-protein coding RNA 323                                                        |
| TLR8         | -1.75649 | 0.000156 | 0.007139 | -3.78101 | Down | toll like receptor 8                                                                              |
| MMRN1        | -1.73947 | 0.001911 | 0.032615 | -3.10377 | Down | multimerin 1                                                                                      |
| LINC02212    | -1.73696 | 0.000153 | 0.007071 | -3.78546 | Down | long intergenic non-protein coding RNA 2212                                                       |
| SERPINA1     | -1.7019  | 0.000906 | 0.020995 | -3.31805 | Down | serpin family A member 1                                                                          |
| LINC00397    | -1.70074 | 0.001066 | 0.02291  | -3.27256 | Down | long intergenic non-protein coding RNA 397                                                        |
| KIF14        | -1.69915 | 6.00E-05 | 0.003997 | -4.01286 | Down | kinesin family member 14                                                                          |
| LOC100421160 | -1.69472 | 0.000973 | 0.021872 | -3.29822 | Down | structural maintenance of chromosomes 5 pseudogene<br>long intergenic non-protein coding RNA 1736 |
| LINC01736    | -1.68032 | 0.000197 | 0.008305 | -3.7222  | Down | 1736                                                                                              |
| MT1L         | -1.67121 | 5.55E-05 | 0.003828 | -4.03115 | Down | metallothionein 1L, pseudogene                                                                    |
| MT1G         | -1.6624  | 1.06E-06 | 0.000296 | -4.88091 | Down | metallothionein 1G                                                                                |
| KCNE4        | -1.64603 | 5.58E-05 | 0.003839 | -4.02985 | Down | potassium voltage-gated channel subfamily E regulatory subunit 4                                  |
| LINC01108    | -1.63308 | 9.88E-05 | 0.005382 | -3.89349 | Down | long intergenic non-protein coding RNA 1108                                                       |
| OR52B6       | -1.62445 | 8.35E-06 | 0.001151 | -4.45609 | Down | olfactory receptor family 52 subfamily B member 6                                                 |
| CDA          | -1.61694 | 0.000209 | 0.008598 | -3.7082  | Down | cytidine deaminase                                                                                |
| LOC100419761 | -1.61275 | 0.001381 | 0.026881 | -3.19869 | Down | zinc finger protein 654 pseudogene                                                                |
| CCR5         | -1.60711 | 0.000223 | 0.008967 | -3.69152 | Down | C-C motif chemokine receptor 5                                                                    |
| LINC02172    | -1.60536 | 5.98E-05 | 0.003997 | -4.01367 | Down | long intergenic non-protein coding RNA 2172                                                       |
| LOC100419170 | -1.60039 | 3.63E-05 | 0.0029   | -4.1301  | Down | toll like receptor 2 pseudogene                                                                   |
| WDR64        | -1.5977  | 0.000147 | 0.006907 | -3.79549 | Down | WD repeat domain 64                                                                               |
| TTK          | -1.58827 | 0.000177 | 0.0077   | -3.74995 | Down | TTK protein kinase                                                                                |
| NOD2         | -1.58663 | 7.76E-05 | 0.004587 | -3.95172 | Down | nucleotide binding oligomerization domain containing 2                                            |
| PLAC8        | -1.57911 | 0.00056  | 0.015417 | -3.45041 | Down | placenta associated 8                                                                             |
| VNN2         | -1.57006 | 9.01E-05 | 0.005046 | -3.91579 | Down | vanin 2                                                                                           |
| MT1F         | -1.56862 | 2.05E-06 | 0.000479 | -4.74891 | Down | metallothionein 1F                                                                                |
| GBP1         | -1.56584 | 3.66E-06 | 0.000686 | -4.63005 | Down | guanylate binding protein 1                                                                       |
| MS4A6A       | -1.55846 | 0.000951 | 0.021608 | -3.30463 | Down | membrane spanning 4-domains A6A                                                                   |
| GBP5         | -1.55818 | 0.000167 | 0.0074   | -3.76429 | Down | guanylate binding protein 5                                                                       |
| GBP2         | -1.55692 | 4.63E-09 | 1.27E-05 | -5.86006 | Down | guanylate binding protein 2                                                                       |
| SLC1A7       | -1.55493 | 5.40E-05 | 0.003754 | -4.03753 | Down | solute carrier family 1 member 7                                                                  |
| HPGD         | -1.54539 | 1.79E-05 | 0.001932 | -4.28899 | Down | 15-hydroxyprostaglandin dehydrogenase                                                             |
| C7           | -1.5299  | 0.000975 | 0.021872 | -3.29777 | Down | complement C7                                                                                     |

|              |          |          |          |          |      |                                                                  |
|--------------|----------|----------|----------|----------|------|------------------------------------------------------------------|
| LOC100419447 | -1.51315 | 0.000885 | 0.020712 | -3.32487 | Down | lysine acetyltransferase 14 pseudogene                           |
| ZNF849P      | -1.51014 | 0.000582 | 0.015781 | -3.44007 | Down | zinc finger protein 849, pseudogene                              |
| S100A4       | -1.50734 | 0.001119 | 0.023525 | -3.25872 | Down | S100 calcium binding protein A4                                  |
| OR51B5       | -1.50185 | 0.001317 | 0.026095 | -3.21218 | Down | olfactory receptor family 51 subfamily B member 5                |
| ANKRD30A     | -1.49293 | 0.00034  | 0.011863 | -3.58301 | Down | ankyrin repeat domain 30A                                        |
| MGAM         | -1.4739  | 2.09E-07 | 9.26E-05 | -5.19088 | Down | maltase-glucoamylase                                             |
| PLA1A        | -1.47336 | 0.000107 | 0.005616 | -3.8747  | Down | phospholipase A1 member A                                        |
| CD180        | -1.46031 | 0.00054  | 0.015092 | -3.45992 | Down | CD180 molecule                                                   |
| EEF1A1P28    | -1.46017 | 0.000796 | 0.019294 | -3.35425 | Down | eukaryotic translation elongation factor 1 alpha 1 pseudogene 28 |
| KIF20A       | -1.45282 | 3.84E-05 | 0.002993 | -4.1169  | Down | kinesin family member 20A                                        |
| LINC01480    | -1.43053 | 0.000494 | 0.014508 | -3.48424 | Down | long intergenic non-protein coding RNA 1480                      |
| CDK1         | -1.42371 | 0.00314  | 0.043598 | -2.95364 | Down | cyclin dependent kinase 1                                        |
| C1QB         | -1.41986 | 0.002463 | 0.037894 | -3.02786 | Down | complement C1q B chain                                           |
| KLRC3        | -1.4196  | 0.002762 | 0.040567 | -2.99301 | Down | killer cell lectin like receptor C3                              |
| MGAM2        | -1.41904 | 0.003224 | 0.044246 | -2.94552 | Down | maltase-glucoamylase 2 (putative)                                |
| NEAT1        | -1.40979 | 1.11E-10 | 7.67E-07 | -6.45055 | Down | nuclear paraspeckle assembly transcript 1                        |
| LOC100133252 | -1.40228 | 5.00E-06 | 0.000818 | -4.56493 | Down | zinc finger protein 131 pseudogene                               |
| RNU1-1       | -1.39805 | 0.002847 | 0.04128  | -2.98375 | Down | RNA, U1 small nuclear 1                                          |
| ASH2LP3      | -1.39017 | 0.000243 | 0.009479 | -3.67001 | Down | ASH2L pseudogene 3                                               |
| BOLL         | -1.38337 | 2.31E-05 | 0.002224 | -4.23269 | Down | boule homolog, RNA binding protein                               |
| SPP1         | -1.37844 | 0.001542 | 0.028739 | -3.16658 | Down | secreted phosphoprotein 1                                        |
| FCGR3A       | -1.36226 | 0.003084 | 0.043223 | -2.95928 | Down | Fc fragment of IgG receptor IIIa                                 |
| EFCAB13-DT   | -1.35955 | 4.29E-05 | 0.003266 | -4.09154 | Down | EFCAB13 divergent transcript                                     |
| LAMB4        | -1.35501 | 0.000422 | 0.013401 | -3.52577 | Down | laminin subunit beta 4                                           |
| RNU6-1043P   | -1.34282 | 0.000392 | 0.012879 | -3.54556 | Down | RNA, U6 small nuclear 1043, pseudogene                           |
| KCNJ15       | -1.33383 | 0.00132  | 0.026136 | -3.21153 | Down | potassium inwardly rectifying channel subfamily J member 15      |
| DDIT4L       | -1.32471 | 5.77E-06 | 0.000909 | -4.53459 | Down | DNA damage inducible transcript 4 like                           |
| TMPRSS12     | -1.31678 | 0.001801 | 0.031306 | -3.12121 | Down | transmembrane serine protease 12                                 |
| SAMSN1       | -1.31589 | 2.73E-05 | 0.00245  | -4.1946  | Down | SAM domain, SH3 domain and nuclear localization signals 1        |
| TNFAIP8      | -1.31156 | 4.12E-07 | 0.000145 | -5.06341 | Down | TNF alpha induced protein 8                                      |
| TFAP2C       | -1.31139 | 0.000594 | 0.015952 | -3.43449 | Down | transcription factor AP-2 gamma                                  |
| AZGP1        | -1.30905 | 5.19E-05 | 0.003695 | -4.04694 | Down | alpha-2-glycoprotein 1, zinc-binding                             |
| HMMR         | -1.30619 | 0.002932 | 0.041948 | -2.9748  | Down | hyaluronan mediated motility receptor                            |
| TLR7         | -1.29052 | 6.55E-05 | 0.004144 | -3.99202 | Down | toll like receptor 7                                             |
| PRRG4        | -1.28905 | 9.14E-05 | 0.005072 | -3.91225 | Down | proline rich and Gla domain 4                                    |
| TNFRSF10D    | -1.28183 | 0.000153 | 0.007071 | -3.78687 | Down | TNF receptor superfamily member 10d                              |
| REP15        | -1.2731  | 0.000139 | 0.00671  | -3.80907 | Down | RAB15 effector protein                                           |
| FYB1         | -1.26793 | 0.000603 | 0.015989 | -3.43043 | Down | FYN binding protein 1                                            |
| SCN4A        | -1.26596 | 0.002923 | 0.041845 | -2.97572 | Down | sodium voltage-gated channel alpha subunit 4                     |
| SLFN12       | -1.26338 | 2.42E-09 | 7.39E-06 | -5.96695 | Down | schlafen family member 12                                        |
| SLFN13       | -1.26259 | 2.39E-06 | 0.00052  | -4.71733 | Down | schlafen family member 13                                        |

|              |          |          |          |          |      |                                                                |
|--------------|----------|----------|----------|----------|------|----------------------------------------------------------------|
| NDUFA3P4     | -1.25782 | 0.003348 | 0.045378 | -2.93385 | Down | NADH:ubiquinone oxidoreductase subunit A3 pseudogene 4         |
| HGF          | -1.2569  | 0.001884 | 0.032253 | -3.10798 | Down | hepatocyte growth factor                                       |
| TRIP10       | -1.25553 | 2.52E-07 | 0.000105 | -5.15653 | Down | thyroid hormone receptor interactor 10                         |
| LOC107984827 | -1.25169 | 0.001622 | 0.029529 | -3.152   | Down | uncharacterized LOC107984827                                   |
| PPEF2        | -1.2479  | 0.003293 | 0.044852 | -2.93899 | Down | protein phosphatase with EF-hand domain 2                      |
| LOC643342    | -1.24391 | 0.00062  | 0.016275 | -3.42276 | Down | ATM interactor pseudogene                                      |
| TLR5         | -1.24339 | 7.18E-05 | 0.004373 | -3.97009 | Down | toll like receptor 5                                           |
| LUCAT1       | -1.233   | 0.002856 | 0.041362 | -2.98281 | Down | lung cancer associated transcript 1                            |
| MTND2P8      | -1.23111 | 0.000664 | 0.017074 | -3.40412 | Down | MT-ND2 pseudogene 8                                            |
| C9orf153     | -1.22934 | 6.81E-05 | 0.004226 | -3.98266 | Down | chromosome 9 open reading frame 153                            |
| SULT1B1      | -1.22225 | 0.002004 | 0.03344  | -3.08958 | Down | sulfotransferase family 1B member 1                            |
| LNCSRLR      | -1.21483 | 0.000513 | 0.014807 | -3.47411 | Down | lncRNA sorafenib resistance in renal cell carcinoma associated |
| TFPI         | -1.21407 | 2.39E-11 | 2.19E-07 | -6.68009 | Down | tissue factor pathway inhibitor                                |
| TLR2         | -1.20881 | 6.41E-05 | 0.004097 | -3.99701 | Down | toll like receptor 2                                           |
| MNDA         | -1.20468 | 4.22E-06 | 0.000744 | -4.60046 | Down | myeloid cell nuclear differentiation antigen                   |
| RUNX3        | -1.19151 | 0.000169 | 0.00746  | -3.76107 | Down | RUNX family transcription factor 3                             |
| PTPRC        | -1.18921 | 9.20E-05 | 0.005092 | -3.91084 | Down | protein tyrosine phosphatase receptor type C                   |
| LVRN         | -1.18869 | 0.000177 | 0.007715 | -3.74907 | Down | laeverin                                                       |
| C3           | -1.18458 | 0.00357  | 0.047132 | -2.91387 | Down | complement C3                                                  |
| INSL6        | -1.18047 | 0.001782 | 0.031189 | -3.12436 | Down | insulin like 6                                                 |
| IL2RG        | -1.1796  | 0.001005 | 0.022151 | -3.28921 | Down | interleukin 2 receptor subunit gamma                           |
| TBX15        | -1.17219 | 0.000571 | 0.015579 | -3.4451  | Down | T-box transcription factor 15                                  |
| MT1M         | -1.16761 | 0.001987 | 0.03328  | -3.09212 | Down | metallothionein 1M                                             |
| CLEC2B       | -1.15159 | 2.22E-05 | 0.002185 | -4.242   | Down | C-type lectin domain family 2 member B                         |
| LOC100127965 | -1.15105 | 0.000312 | 0.011178 | -3.60513 | Down | ribosomal protein L7 like 1 pseudogene                         |
| CFI          | -1.1494  | 1.18E-05 | 0.001476 | -4.38129 | Down | complement factor I                                            |
| SINHCAF      | -1.14665 | 3.07E-05 | 0.002639 | -4.16827 | Down | SIN3-HDAC complex associated factor                            |
| NIBAN1       | -1.14201 | 6.35E-05 | 0.004086 | -3.99941 | Down | niban apoptosis regulator 1                                    |
| GAS2L3       | -1.14131 | 5.93E-06 | 0.000922 | -4.52891 | Down | growth arrest specific 2 like 3                                |
| KRBOX1-AS1   | -1.14021 | 0.0008   | 0.01934  | -3.35283 | Down | KRBOX1 antisense RNA 1                                         |
| DNAH11       | -1.1318  | 1.75E-06 | 0.000419 | -4.78029 | Down | dynein axonemal heavy chain 11                                 |
| CENPF        | -1.13064 | 0.000115 | 0.005886 | -3.85725 | Down | centromere protein F                                           |
| RNU1-134P    | -1.12063 | 0.000246 | 0.009491 | -3.66679 | Down | RNA, U1 small nuclear 134, pseudogene                          |
| ZBTB20-AS5   | -1.11876 | 0.000824 | 0.01976  | -3.34454 | Down | ZBTB20 antisense RNA 5                                         |
| PIK3AP1      | -1.11611 | 0.000682 | 0.017387 | -3.39678 | Down | phosphoinositide-3-kinase adaptor protein 1                    |
| TRIM5        | -1.11304 | 1.87E-11 | 2.19E-07 | -6.71606 | Down | tripartite motif containing 5                                  |
| JAML         | -1.10628 | 0.001665 | 0.029949 | -3.14421 | Down | junction adhesion molecule like                                |
| GIMAP4       | -1.09957 | 1.46E-08 | 2.23E-05 | -5.6666  | Down | GTPase, IMAP family member 4                                   |
| NUPR1        | -1.0891  | 1.52E-05 | 0.001755 | -4.32604 | Down | nuclear protein 1, transcriptional regulator                   |
| PI15         | -1.08496 | 0.000508 | 0.014733 | -3.47671 | Down | peptidase inhibitor 15                                         |
| E2F7         | -1.08082 | 0.000348 | 0.011953 | -3.57637 | Down | E2F transcription factor 7                                     |
| NUSAP1       | -1.07895 | 0.002026 | 0.033627 | -3.08635 | Down | nucleolar and spindle associated protein 1                     |

|                 |          |          |          |          |      |                                                                                    |
|-----------------|----------|----------|----------|----------|------|------------------------------------------------------------------------------------|
| METTL7B         | -1.0788  | 0.001608 | 0.029425 | -3.15449 | Down | methyltransferase like 7B                                                          |
| FCGR2A          | -1.07674 | 0.001737 | 0.030742 | -3.13182 | Down | Fc fragment of IgG receptor IIa                                                    |
| VCAN-AS1        | -1.07553 | 0.001147 | 0.023937 | -3.25162 | Down | VCAN antisense RNA 1                                                               |
| RBM47           | -1.0696  | 0.000346 | 0.0119   | -3.57785 | Down | RNA binding motif protein 47                                                       |
| CYSLTR2         | -1.06853 | 6.28E-07 | 0.000192 | -4.98233 | Down | cysteinyl leukotriene receptor 2<br>long intergenic non-protein coding RNA<br>2181 |
| LINC02181       | -1.06621 | 0.00272  | 0.040195 | -2.99778 | Down |                                                                                    |
| HORMAD1         | -1.06471 | 0.00123  | 0.025012 | -3.23179 | Down | HORMA domain containing 1                                                          |
| TMEM213         | -1.05462 | 0.002465 | 0.037896 | -3.02756 | Down | transmembrane protein 213<br>arachidonate 5-lipoxygenase activating<br>protein     |
| ALOX5AP         | -1.05188 | 0.001515 | 0.028437 | -3.17176 | Down |                                                                                    |
| NEB             | -1.05174 | 1.10E-07 | 6.61E-05 | -5.30997 | Down | nebulin                                                                            |
| S100A11         | -1.0488  | 0.000625 | 0.016385 | -3.42066 | Down | S100 calcium binding protein A11                                                   |
| ADAMDEC1        | -1.04762 | 0.0007   | 0.017717 | -3.38951 | Down | ADAM like decysin 1                                                                |
| LAMP3           | -1.04488 | 0.001749 | 0.030825 | -3.12979 | Down | lysosomal associated membrane protein 3                                            |
| CPVL            | -1.04134 | 5.20E-05 | 0.003695 | -4.04661 | Down | carboxypeptidase vitellogenic like                                                 |
| CCDC160         | -1.04131 | 0.000109 | 0.005643 | -3.87071 | Down | coiled-coil domain containing 160                                                  |
| P2RY6           | -1.04067 | 0.001386 | 0.026896 | -3.19753 | Down | pyrimidinergic receptor P2Y6<br>HIG1 hypoxia inducible domain family<br>member 1B  |
| HIGD1B          | -1.03655 | 0.000564 | 0.015483 | -3.44844 | Down |                                                                                    |
| IHO1            | -1.02756 | 6.05E-05 | 0.004001 | -4.01089 | Down | interactor of HORMAD1 1                                                            |
| FCER1G          | -1.02741 | 0.003772 | 0.048658 | -2.89663 | Down | Fc fragment of IgE receptor Ig                                                     |
| MICB            | -1.02036 | 0.000371 | 0.012399 | -3.55966 | Down | MHC class I polypeptide-related sequence B                                         |
| SMTN            | -1.02019 | 3.54E-05 | 0.002875 | -4.13542 | Down | smoothelin                                                                         |
| IFI16           | -1.01659 | 2.83E-07 | 0.000115 | -5.13465 | Down | interferon gamma inducible protein 16                                              |
| SELL            | -1.01452 | 3.69E-05 | 0.00293  | -4.12591 | Down | selectin L                                                                         |
| LAPTM5          | -1.01412 | 0.001082 | 0.023085 | -3.26821 | Down | lysosomal protein transmembrane 5                                                  |
| OVCH1           | -1.01036 | 5.78E-06 | 0.000909 | -4.53423 | Down | ovochoyase 1<br>lysophosphatidylglycerol acyltransferase 1<br>pseudogene 1         |
| LPGAT1P1        | -1.00861 | 0.001516 | 0.028437 | -3.17165 | Down |                                                                                    |
| RNU6-327P       | -1.00767 | 0.002941 | 0.041978 | -2.97383 | Down | RNA, U6 small nuclear 327, pseudogene                                              |
| FKBP5           | -1.00683 | 1.04E-05 | 0.001344 | -4.40766 | Down | FKBP prolyl isomerase 5                                                            |
| DIAPH3          | -1.0059  | 0.000246 | 0.009491 | -3.6661  | Down | diaphanous related formin 3                                                        |
| CASP4           | -1.00535 | 0.000313 | 0.011178 | -3.60411 | Down | caspase 4                                                                          |
| NMI             | -1.00522 | 1.44E-07 | 7.50E-05 | -5.26001 | Down | N-myc and STAT interactor                                                          |
| ALKAL2          | -1.0042  | 2.28E-08 | 2.73E-05 | -5.58906 | Down | ALK and LTK ligand 2                                                               |
| STEAP4          | -1.00344 | 0.001373 | 0.026815 | -3.20023 | Down | STEAP4 metalloredutase                                                             |
| IFNE            | -0.99743 | 0.000449 | 0.013741 | -3.50919 | Down | interferon epsilon                                                                 |
| MIR2052HG       | -0.99336 | 4.50E-07 | 0.000157 | -5.04655 | Down | MIR2052 host gene                                                                  |
| ADGRL4          | -0.99009 | 1.39E-07 | 7.50E-05 | -5.26681 | Down | adhesion G protein-coupled receptor L4                                             |
| TM4SF18         | -0.98989 | 0.000108 | 0.00564  | -3.87235 | Down | transmembrane 4 L six family member 18                                             |
| SYK             | -0.98607 | 0.001987 | 0.03328  | -3.09213 | Down | spleen associated tyrosine kinase                                                  |
| CGAS            | -0.98593 | 1.65E-07 | 8.25E-05 | -5.23514 | Down | cyclic GMP-AMP synthase                                                            |
| RNU4ATAC18<br>P | -0.98511 | 0.002674 | 0.039734 | -3.00288 | Down | RNA, U4atac small nuclear 18, pseudogene                                           |
| LINC00484       | -0.98344 | 6.88E-05 | 0.004246 | -3.98031 | Down | long intergenic non-protein coding RNA 484                                         |
| GLI1            | -0.97388 | 0.002206 | 0.035494 | -3.06101 | Down | GLI family zinc finger 1                                                           |

|             |          |          |          |          |      |                                                                              |
|-------------|----------|----------|----------|----------|------|------------------------------------------------------------------------------|
| LCP1        | -0.97358 | 0.000255 | 0.00975  | -3.65706 | Down | lymphocyte cytosolic protein 1                                               |
| MT2A        | -0.97289 | 0.000402 | 0.013043 | -3.53846 | Down | metallothionein 2A                                                           |
| LY75        | -0.97271 | 0.002153 | 0.034976 | -3.06822 | Down | lymphocyte antigen 75                                                        |
| MT1X        | -0.97074 | 0.001644 | 0.029765 | -3.14793 | Down | metallothionein 1X                                                           |
| LINC02072   | -0.96901 | 2.57E-05 | 0.002346 | -4.20881 | Down | long intergenic non-protein coding RNA 2072                                  |
| IL17RB      | -0.96672 | 3.35E-06 | 0.000659 | -4.64802 | Down | interleukin 17 receptor B                                                    |
| GPR4        | -0.9665  | 0.0032   | 0.044062 | -2.94788 | Down | G protein-coupled receptor 4                                                 |
| ATP8        | -0.96532 | 0.000274 | 0.01027  | -3.63909 | Down | ATP synthase F0 subunit 8                                                    |
| SPN         | -0.96512 | 0.000728 | 0.018194 | -3.37881 | Down | sialophorin                                                                  |
| KIAA0040    | -0.96207 | 0.001647 | 0.029793 | -3.14747 | Down | KIAA0040                                                                     |
| RANBP3L     | -0.96063 | 0.000772 | 0.018921 | -3.36281 | Down | RAN binding protein 3 like                                                   |
| DTX3L       | -0.95262 | 3.42E-07 | 0.000127 | -5.09867 | Down | deltex E3 ubiquitin ligase 3L                                                |
| CALHM5      | -0.95141 | 9.99E-05 | 0.0054   | -3.89085 | Down | calcium homeostasis modulator family member 5                                |
| ANKRD18A    | -0.94661 | 0.001544 | 0.028739 | -3.16637 | Down | ankyrin repeat domain 18A                                                    |
| GOLGA6L17P  | -0.94627 | 0.00022  | 0.008915 | -3.69486 | Down | golgin A6 family like 17, pseudogene                                         |
| SAMD9       | -0.94254 | 2.39E-06 | 0.00052  | -4.71736 | Down | sterile alpha motif domain containing 9                                      |
| MYCT1       | -0.94151 | 2.38E-06 | 0.00052  | -4.71798 | Down | MYC target 1                                                                 |
| CYBB        | -0.9388  | 0.00222  | 0.035661 | -3.05908 | Down | cytochrome b-245 beta chain                                                  |
| TLR1        | -0.93874 | 0.001548 | 0.028786 | -3.16546 | Down | toll like receptor 1                                                         |
| NEFH        | -0.93787 | 0.000663 | 0.017074 | -3.40442 | Down | neurofilament heavy chain                                                    |
| BACE2       | -0.93708 | 2.73E-06 | 0.000569 | -4.69034 | Down | beta-secretase 2                                                             |
| GABRE       | -0.93021 | 0.000902 | 0.020983 | -3.31941 | Down | gamma-aminobutyric acid type A receptor subunit epsilon                      |
| SRGN        | -0.92998 | 0.0014   | 0.027045 | -3.19472 | Down | serglycin                                                                    |
| CELSR1      | -0.92843 | 0.000762 | 0.018781 | -3.36608 | Down | cadherin EGF LAG seven-pass G-type receptor 1                                |
| NCKAP1L     | -0.92686 | 0.003089 | 0.043274 | -2.95875 | Down | NCK associated protein 1 like                                                |
| PARP9       | -0.92283 | 4.89E-07 | 0.000168 | -5.03048 | Down | poly(ADP-ribose) polymerase family member 9                                  |
| GBP3        | -0.92164 | 0.000233 | 0.00922  | -3.68074 | Down | guanylate binding protein 3                                                  |
| TRIM38      | -0.9211  | 3.13E-06 | 0.00062  | -4.66206 | Down | tripartite motif containing 38                                               |
| SASH3       | -0.92054 | 0.000591 | 0.015912 | -3.43592 | Down | SAM and SH3 domain containing 3                                              |
| CEP152      | -0.9181  | 2.89E-08 | 3.06E-05 | -5.54784 | Down | centrosomal protein 152                                                      |
| ST3GAL3-AS1 | -0.91766 | 0.001108 | 0.023334 | -3.26155 | Down | ST3GAL3 antisense RNA 1                                                      |
| SP100       | -0.91653 | 1.26E-08 | 2.14E-05 | -5.69134 | Down | SP100 nuclear antigen                                                        |
| CLIC1       | -0.91463 | 2.45E-05 | 0.002287 | -4.21914 | Down | chloride intracellular channel 1                                             |
| IKBIP       | -0.91383 | 3.61E-06 | 0.000686 | -4.63287 | Down | IKBKB interacting protein                                                    |
| APBB1IP     | -0.91296 | 0.00373  | 0.048372 | -2.9001  | Down | amyloid beta precursor protein binding family B member 1 interacting protein |
| OSMR        | -0.91239 | 0.001259 | 0.025384 | -3.2251  | Down | oncostatin M receptor                                                        |
| LOC646112   | -0.91226 | 8.71E-05 | 0.004941 | -3.924   | Down | origin recognition complex subunit 3 pseudogene                              |
| SAMD9L      | -0.90998 | 4.51E-05 | 0.003352 | -4.07982 | Down | sterile alpha motif domain containing 9 like                                 |
| SLA         | -0.90389 | 0.00043  | 0.013489 | -3.5207  | Down | Src like adaptor                                                             |
| LINC02475   | -0.90162 | 0.00145  | 0.027772 | -3.18443 | Down | long intergenic non-protein coding RNA 2475                                  |
| MT1E        | -0.89444 | 0.002351 | 0.036854 | -3.04183 | Down | metallothionein 1E                                                           |



|             |          |          |          |          |      |                                                                             |
|-------------|----------|----------|----------|----------|------|-----------------------------------------------------------------------------|
| KCNJ16      | -0.89303 | 0.001564 | 0.028958 | -3.16256 | Down | potassium inwardly rectifying channel subfamily J member 16                 |
| RPL34P5     | -0.89284 | 0.001848 | 0.031874 | -3.11368 | Down | ribosomal protein L34 pseudogene 5                                          |
| NXPE2       | -0.89075 | 0.000385 | 0.012726 | -3.54998 | Down | neurexophilin and PC-esterase domain family member 2                        |
| PDK4        | -0.88605 | 0.000345 | 0.011881 | -3.57908 | Down | pyruvate dehydrogenase kinase 4                                             |
| NFATC2      | -0.88506 | 1.15E-06 | 0.000311 | -4.8637  | Down | nuclear factor of activated T cells 2                                       |
| ANKRD62     | -0.88483 | 0.000197 | 0.008305 | -3.72254 | Down | ankyrin repeat domain 62                                                    |
| RPL7P60     | -0.88298 | 0.001274 | 0.025553 | -3.22176 | Down | ribosomal protein L7 pseudogene 60                                          |
| GNRH1       | -0.87959 | 6.68E-07 | 0.000202 | -4.97056 | Down | gonadotropin releasing hormone 1                                            |
| MAFF        | -0.87886 | 0.003248 | 0.044415 | -2.94327 | Down | MAF bZIP transcription factor F family with sequence similarity 89 member A |
| FAM89A      | -0.87651 | 0.000121 | 0.006039 | -3.8438  | Down |                                                                             |
| CYYR1       | -0.87607 | 3.27E-05 | 0.002745 | -4.15365 | Down | cysteine and tyrosine rich 1                                                |
| CD34        | -0.87586 | 0.000364 | 0.012264 | -3.56472 | Down | CD34 molecule                                                               |
| CCNA2       | -0.87067 | 0.000173 | 0.00759  | -3.75556 | Down | cyclin A2                                                                   |
| LRRC37A     | -0.87001 | 0.002019 | 0.033543 | -3.08745 | Down | leucine rich repeat containing 37A                                          |
| BRCA2       | -0.86991 | 0.000278 | 0.010363 | -3.63536 | Down | BRCA2 DNA repair associated                                                 |
| HCLS1       | -0.86901 | 0.00221  | 0.035546 | -3.0604  | Down | hematopoietic cell-specific Lyn substrate 1                                 |
| RAB13       | -0.86615 | 5.30E-08 | 4.42E-05 | -5.44095 | Down | RAB13, member RAS oncogene family                                           |
| TFEC        | -0.86545 | 0.00059  | 0.015912 | -3.43631 | Down | transcription factor EC                                                     |
| PIK3CG      | -0.86445 | 0.000651 | 0.016826 | -3.40957 | Down | phosphatidylinositol-4,5-bisphosphate 3-kinase catalytic subunit gamma      |
| SLC25A48    | -0.86363 | 0.000517 | 0.014856 | -3.47198 | Down | solute carrier family 25 member 48                                          |
| GIMAP7      | -0.86351 | 6.31E-05 | 0.004086 | -4.00073 | Down | GTPase, IMAP family member 7                                                |
| EHF         | -0.86282 | 0.00028  | 0.010392 | -3.63326 | Down | ETS homologous factor                                                       |
| SLC7A11-AS1 | -0.86071 | 0.000216 | 0.008813 | -3.69929 | Down | SLC7A11 antisense RNA 1                                                     |
| GBP4        | -0.86046 | 0.000973 | 0.021872 | -3.29823 | Down | guanylate binding protein 4                                                 |
| CSF3R       | -0.85973 | 0.002844 | 0.041272 | -2.98412 | Down | colony stimulating factor 3 receptor                                        |
| GNPMB       | -0.85532 | 0.00254  | 0.03864  | -3.01848 | Down | glycoprotein nmb                                                            |
| ITGB3       | -0.85194 | 0.000323 | 0.011415 | -3.59598 | Down | integrin subunit beta 3                                                     |
| ND3         | -0.85175 | 4.22E-05 | 0.003233 | -4.09517 | Down | NADH dehydrogenase subunit 3                                                |
| SLC7A2      | -0.85126 | 0.000155 | 0.007123 | -3.78239 | Down | solute carrier family 7 member 2                                            |
| ANXA3       | -0.85083 | 0.000259 | 0.009843 | -3.65321 | Down | annexin A3                                                                  |
| MAP3K8      | -0.84407 | 6.92E-06 | 0.001029 | -4.49612 | Down | mitogen-activated protein kinase kinase kinase 8                            |
| PRELP       | -0.84373 | 0.001523 | 0.028538 | -3.17034 | Down | proline and arginine rich end leucine rich repeat protein                   |
| EMCN        | -0.84365 | 3.34E-05 | 0.002779 | -4.14871 | Down | endomucin                                                                   |
| PERP        | -0.84259 | 7.11E-06 | 0.001047 | -4.49029 | Down | p53 apoptosis effector related to PMP22                                     |
| FAM111A     | -0.84246 | 2.13E-07 | 9.26E-05 | -5.18721 | Down | FAM111 trypsin like peptidase A                                             |
| COL27A1     | -0.84243 | 0.001727 | 0.030623 | -3.13351 | Down | collagen type XXVII alpha 1 chain                                           |
| CDK2        | -0.83957 | 0.000257 | 0.009806 | -3.65488 | Down | cyclin dependent kinase 2                                                   |
| LOC285638   | -0.83658 | 0.000343 | 0.011874 | -3.58039 | Down | uncharacterized LOC285638                                                   |
| PTAFR       | -0.83578 | 0.003109 | 0.04342  | -2.95677 | Down | platelet activating factor receptor                                         |
| SLC43A3     | -0.83567 | 5.44E-06 | 0.000875 | -4.54706 | Down | solute carrier family 43 member 3                                           |
| GIMAP2      | -0.83467 | 0.002442 | 0.037728 | -3.03043 | Down | GTPase, IMAP family member 2                                                |

|           |          |          |          |          |      |                                                  |
|-----------|----------|----------|----------|----------|------|--------------------------------------------------|
| LIPH      | -0.83394 | 0.000486 | 0.014399 | -3.4884  | Down | lipase H                                         |
| ORC1      | -0.8281  | 0.003318 | 0.045042 | -2.93661 | Down | origin recognition complex subunit 1             |
| YES1      | -0.82751 | 1.07E-08 | 2.09E-05 | -5.72002 | Down | YES proto-oncogene 1, Src family tyrosine kinase |
| NCF2      | -0.82451 | 0.000186 | 0.007966 | -3.73748 | Down | neutrophil cytosolic factor 2                    |
| CD58      | -0.82367 | 7.30E-06 | 0.001068 | -4.48475 | Down | CD58 molecule                                    |
| NEXN      | -0.82312 | 0.000134 | 0.006489 | -3.81884 | Down | nexilin F-actin binding protein                  |
| CARD6     | -0.82251 | 2.62E-05 | 0.002373 | -4.20389 | Down | caspase recruitment domain family member 6       |
| PXDC1     | -0.8213  | 2.36E-06 | 0.00052  | -4.71974 | Down | PX domain containing 1                           |
| MTCO1P40  | -0.82053 | 0.000753 | 0.018665 | -3.36952 | Down | MT-CO1 pseudogene 40                             |
| RASSF8    | -0.81999 | 1.36E-06 | 0.000349 | -4.8314  | Down | Ras association domain family member 8           |
| TNFSF10   | -0.81915 | 0.000938 | 0.02141  | -3.30842 | Down | TNF superfamily member 10                        |
| MTATP6P1  | -0.81521 | 0.000106 | 0.005585 | -3.87745 | Down | MT-ATP6 pseudogene 1                             |
| ITGA10    | -0.81341 | 7.55E-05 | 0.004516 | -3.95831 | Down | integrin subunit alpha 10                        |
| ZIC5      | -0.81205 | 8.90E-05 | 0.005029 | -3.91873 | Down | Zic family member 5                              |
| BTK       | -0.81154 | 0.003463 | 0.046184 | -2.92336 | Down | Bruton tyrosine kinase                           |
| PRKX      | -0.81076 | 2.81E-06 | 0.000576 | -4.68458 | Down | protein kinase X-linked                          |
| TRIM21    | -0.80991 | 2.17E-05 | 0.00217  | -4.24708 | Down | tripartite motif containing 21                   |
| NQO1      | -0.80936 | 2.77E-05 | 0.002474 | -4.19165 | Down | NAD(P)H quinone dehydrogenase 1                  |
| FGF11     | -0.80712 | 0.001443 | 0.027665 | -3.18594 | Down | fibroblast growth factor 11                      |
| TEAD2     | -0.80581 | 0.001956 | 0.033063 | -3.09679 | Down | TEA domain transcription factor 2                |
| B2M       | -0.80307 | 2.14E-05 | 0.002159 | -4.25    | Down | beta-2-microglobulin                             |
| TRDN      | -0.80304 | 0.001169 | 0.0242   | -3.24636 | Down | triadin                                          |
| MYOF      | -0.80162 | 2.33E-05 | 0.002232 | -4.23082 | Down | myoferlin                                        |
| SLC39A12  | -0.7989  | 0.000141 | 0.006744 | -3.80664 | Down | solute carrier family 39 member 12               |
| ADGRE2    | -0.79867 | 0.002636 | 0.039477 | -3.00731 | Down | adhesion G protein-coupled receptor E2           |
| ANXA2     | -0.79731 | 0.002332 | 0.03667  | -3.04429 | Down | annexin A2                                       |
| RNU6-125P | -0.79696 | 0.002988 | 0.042255 | -2.96895 | Down | RNA, U6 small nuclear 125, pseudogene            |
| ADAM28    | -0.7952  | 0.002881 | 0.041539 | -2.98021 | Down | ADAM metallopeptidase domain 28                  |
| FLT1      | -0.79515 | 0.000576 | 0.01567  | -3.44278 | Down | fms related receptor tyrosine kinase 1           |
| MECOM     | -0.79448 | 1.26E-05 | 0.001547 | -4.36666 | Down | MDS1 and EVI1 complex locus                      |
| TGFBR1    | -0.7937  | 0.000294 | 0.010741 | -3.62058 | Down | transforming growth factor beta receptor 1       |
| IRAK3     | -0.79303 | 0.000163 | 0.007315 | -3.77043 | Down | interleukin 1 receptor associated kinase 3       |
| GNG11     | -0.79254 | 1.66E-05 | 0.001872 | -4.30633 | Down | G protein subunit gamma 11                       |
| RPS8P7    | -0.79199 | 0.001137 | 0.02378  | -3.25432 | Down | ribosomal protein S8 pseudogene 7                |
| FLI1      | -0.7911  | 2.47E-05 | 0.002294 | -4.21772 | Down | Fli-1 proto-oncogene, ETS transcription factor   |
| DNA2      | -0.78962 | 7.38E-08 | 5.49E-05 | -5.38165 | Down | DNA replication helicase/nuclease 2              |
| SHOC1     | -0.78749 | 0.000455 | 0.013846 | -3.506   | Down | shortage in chiasmata 1                          |
| CTSS      | -0.78733 | 0.001262 | 0.025427 | -3.2244  | Down | cathepsin S                                      |
| SLC38A2   | -0.78506 | 1.73E-06 | 0.000418 | -4.78252 | Down | solute carrier family 38 member 2                |
| LPCAT2    | -0.78354 | 0.002637 | 0.039477 | -3.00715 | Down | lysophosphatidylcholine acyltransferase 2        |
| HELB      | -0.78076 | 4.32E-06 | 0.000752 | -4.59551 | Down | DNA helicase B                                   |
| BAZ1A     | -0.77762 | 1.81E-05 | 0.001932 | -4.28691 | Down | bromodomain adjacent to zinc finger domain 1A    |

|              |          |          |          |          |      |                                                      |
|--------------|----------|----------|----------|----------|------|------------------------------------------------------|
| ARHGAP42     | -0.77714 | 3.51E-07 | 0.000127 | -5.0937  | Down | Rho GTPase activating protein 42                     |
| HHEX         | -0.77656 | 0.000203 | 0.008463 | -3.71486 | Down | hematopoietically expressed homeobox                 |
| PCOLCE2      | -0.77646 | 0.002655 | 0.039638 | -3.00509 | Down | procollagen C-endopeptidase enhancer 2               |
| CALD1        | -0.77645 | 1.16E-08 | 2.12E-05 | -5.706   | Down | caldesmon 1                                          |
| FLVCR1-DT    | -0.77633 | 0.000419 | 0.013378 | -3.52775 | Down | FLVCR1 divergent transcript                          |
| ZIC2         | -0.77456 | 0.000458 | 0.013911 | -3.50416 | Down | Zic family member 2                                  |
| ACSS3        | -0.77387 | 1.91E-06 | 0.000452 | -4.76319 | Down | acyl-CoA synthetase short chain family member 3      |
| DIO1         | -0.7722  | 0.000406 | 0.013127 | -3.53616 | Down | iodothyronine deiodinase 1                           |
| SP140L       | -0.77187 | 6.42E-06 | 0.000982 | -4.51201 | Down | SP140 nuclear body protein like                      |
| ZNF813       | -0.77179 | 6.36E-05 | 0.004086 | -3.99918 | Down | zinc finger protein 813                              |
| ITGA1        | -0.77082 | 1.15E-05 | 0.001445 | -4.38686 | Down | integrin subunit alpha 1                             |
| LINC00472    | -0.76778 | 6.27E-06 | 0.000963 | -4.51721 | Down | long intergenic non-protein coding RNA 472           |
| RPS3AP22     | -0.76742 | 0.000397 | 0.012973 | -3.54212 | Down | RPS3A pseudogene 22                                  |
| LINC01561    | -0.76472 | 0.001984 | 0.033274 | -3.09255 | Down | long intergenic non-protein coding RNA 1561          |
| HK2          | -0.76432 | 0.003666 | 0.047893 | -2.90558 | Down | hexokinase 2                                         |
| ND4L         | -0.76246 | 0.000324 | 0.011442 | -3.59502 | Down | NADH dehydrogenase subunit 4L                        |
| SQOR         | -0.76222 | 0.001956 | 0.033063 | -3.0969  | Down | sulfide quinone oxidoreductase                       |
| GPR160       | -0.76131 | 0.001944 | 0.032966 | -3.09865 | Down | G protein-coupled receptor 160                       |
| RNU6-759P    | -0.76121 | 0.001994 | 0.033344 | -3.0912  | Down | RNA, U6 small nuclear 759, pseudogene                |
| PARP14       | -0.75925 | 1.40E-06 | 0.000356 | -4.82559 | Down | poly(ADP-ribose) polymerase family member 14         |
| NABP1        | -0.75911 | 7.98E-05 | 0.004625 | -3.94499 | Down | nucleic acid binding protein 1                       |
| MSTN         | -0.75632 | 0.000875 | 0.020519 | -3.32799 | Down | myostatin                                            |
| NRM          | -0.75617 | 0.002475 | 0.037981 | -3.02638 | Down | nurim                                                |
| RNF152       | -0.75593 | 1.45E-07 | 7.50E-05 | -5.2594  | Down | ring finger protein 152                              |
| STAU2-AS1    | -0.75549 | 0.00384  | 0.049281 | -2.89101 | Down | STAU2 antisense RNA 1                                |
| PSMB8-AS1    | -0.75471 | 0.000435 | 0.013489 | -3.5179  | Down | PSMB8 antisense RNA 1 (head to head)                 |
| EVC2         | -0.75384 | 0.003015 | 0.042459 | -2.96618 | Down | EvC ciliary complex subunit 2                        |
| CNTNAP3B     | -0.75135 | 0.002515 | 0.038354 | -3.02157 | Down | contactin associated protein family member 3B        |
| FBXO5        | -0.75075 | 6.57E-06 | 0.000993 | -4.50711 | Down | F-box protein 5                                      |
| OLFML1       | -0.74907 | 0.001219 | 0.024894 | -3.23446 | Down | olfactomedin like 1                                  |
| HEBP2        | -0.74845 | 2.78E-06 | 0.000574 | -4.68676 | Down | heme binding protein 2                               |
| SAMD4A       | -0.7477  | 1.41E-07 | 7.50E-05 | -5.2645  | Down | sterile alpha motif domain containing 4A             |
| ZNF676       | -0.74624 | 0.000538 | 0.015092 | -3.46087 | Down | zinc finger protein 676                              |
| LGR4-AS1     | -0.74562 | 0.00208  | 0.034205 | -3.07859 | Down | LGR4 antisense RNA 1                                 |
| FOXC1        | -0.74331 | 0.00116  | 0.024117 | -3.24842 | Down | forkhead box C1                                      |
| CD302        | -0.74319 | 0.000153 | 0.007071 | -3.78615 | Down | CD302 molecule                                       |
| IFITM3       | -0.74225 | 0.00252  | 0.038417 | -3.0209  | Down | interferon induced transmembrane protein 3           |
| DOCK2        | -0.74156 | 0.001847 | 0.031874 | -3.11374 | Down | dedicator of cytokinesis 2                           |
| NEDD4        | -0.74119 | 1.87E-07 | 9.01E-05 | -5.2121  | Down | NEDD4 E3 ubiquitin protein ligase                    |
| LOC105372321 | -0.7407  | 2.00E-07 | 9.17E-05 | -5.19929 | Down | uncharacterized LOC105372321                         |
| DBI          | -0.73676 | 1.11E-07 | 6.61E-05 | -5.30846 | Down | diazepam binding inhibitor, acyl-CoA binding protein |
| MEFV         | -0.73627 | 0.003224 | 0.044246 | -2.94554 | Down | MEFV innate immunity regulator, pyrin                |

|            |          |          |          |          |      |                                                                                                 |
|------------|----------|----------|----------|----------|------|-------------------------------------------------------------------------------------------------|
| ROM1       | -0.73574 | 0.000973 | 0.021872 | -3.2982  | Down | retinal outer segment membrane protein 1                                                        |
| FBXL19-AS1 | -0.73573 | 3.63E-05 | 0.0029   | -4.13016 | Down | FBXL19 antisense RNA 1                                                                          |
| IFIH1      | -0.73571 | 2.09E-07 | 9.26E-05 | -5.1914  | Down | interferon induced with helicase C domain 1                                                     |
| ATP6       | -0.73497 | 0.000158 | 0.007185 | -3.77893 | Down | ATP synthase F0 subunit 6<br>high mobility group nucleosome binding<br>domain 5                 |
| HMG5       | -0.73375 | 9.72E-05 | 0.005329 | -3.89742 | Down |                                                                                                 |
| SNORA33    | -0.73284 | 0.001137 | 0.02378  | -3.25414 | Down | small nucleolar RNA, H/ACA box 33                                                               |
| DDR2       | -0.73248 | 4.71E-08 | 4.05E-05 | -5.46193 | Down | discoidin domain receptor tyrosine kinase 2                                                     |
| ND4        | -0.73217 | 5.40E-05 | 0.003754 | -4.0375  | Down | NADH dehydrogenase subunit 4                                                                    |
| TPD52L1    | -0.73121 | 0.000604 | 0.015989 | -3.42985 | Down | TPD52 like 1                                                                                    |
| BCL6       | -0.73109 | 4.32E-05 | 0.003272 | -4.08959 | Down | BCL6 transcription repressor<br>HECT and RLD domain containing E3<br>ubiquitin protein ligase 5 |
| HERC5      | -0.73092 | 5.37E-05 | 0.003754 | -4.03884 | Down |                                                                                                 |
| C4orf19    | -0.73007 | 0.002764 | 0.040567 | -2.99287 | Down | chromosome 4 open reading frame 19                                                              |
| OAS2       | -0.72924 | 0.000443 | 0.013604 | -3.51305 | Down | 2'-5'-oligoadenylate synthetase 2                                                               |
| LRRC1      | -0.72829 | 0.00123  | 0.025012 | -3.23179 | Down | leucine rich repeat containing 1                                                                |
| CCDC18     | -0.72687 | 7.79E-06 | 0.001105 | -4.47085 | Down | coiled-coil domain containing 18                                                                |
| COX2       | -0.72549 | 0.000143 | 0.00676  | -3.80295 | Down | cytochrome c oxidase subunit II                                                                 |
| ATP11C     | -0.72387 | 5.94E-07 | 0.000192 | -4.99332 | Down | ATPase phospholipid transporting 11C<br>WW domain containing transcription<br>regulator 1       |
| WWTR1      | -0.72365 | 6.23E-07 | 0.000192 | -4.98389 | Down |                                                                                                 |
| GAU1       | -0.72061 | 0.000796 | 0.019294 | -3.35422 | Down | GALNT8 antisense upstream 1                                                                     |
| TES        | -0.72036 | 0.002341 | 0.036779 | -3.04323 | Down | testin LIM domain protein                                                                       |
| RFTN2      | -0.72016 | 0.000254 | 0.009732 | -3.65824 | Down | rafflin family member 2                                                                         |
| RPL23AP5   | -0.71913 | 0.002909 | 0.041695 | -2.97714 | Down | ribosomal protein L23a pseudogene 5                                                             |
| TMEM45B    | -0.7184  | 0.001649 | 0.029804 | -3.14717 | Down | transmembrane protein 45B                                                                       |
| ND6        | -0.71806 | 7.62E-05 | 0.004539 | -3.95601 | Down | NADH dehydrogenase subunit 6                                                                    |
| RHOQ       | -0.71729 | 1.01E-07 | 6.61E-05 | -5.3249  | Down | ras homolog family member Q                                                                     |
| SLC5A9     | -0.71634 | 0.000228 | 0.009147 | -3.68531 | Down | solute carrier family 5 member 9                                                                |
| CNTLN      | -0.71557 | 1.14E-07 | 6.68E-05 | -5.30262 | Down | centlein                                                                                        |
| TRIM22     | -0.71401 | 5.49E-05 | 0.003806 | -4.03366 | Down | tripartite motif containing 22                                                                  |
| ND2        | -0.71356 | 0.000101 | 0.005414 | -3.88785 | Down | NADH dehydrogenase subunit 2                                                                    |
| HMGB3P4    | -0.71193 | 0.002276 | 0.036075 | -3.05162 | Down | high mobility group box 3 pseudogene 4                                                          |
| CLDN18     | -0.71128 | 0.001349 | 0.026519 | -3.20527 | Down | claudin 18                                                                                      |
| DSE        | -0.70878 | 8.41E-08 | 5.93E-05 | -5.35821 | Down | dermatan sulfate epimerase                                                                      |
| NLRC5      | -0.70809 | 0.003005 | 0.042411 | -2.96723 | Down | NLR family CARD domain containing 5                                                             |
| CASP7      | -0.70804 | 0.000326 | 0.011469 | -3.5934  | Down | caspase 7                                                                                       |
| MMRN2      | -0.7073  | 0.001322 | 0.02615  | -3.21117 | Down | multimerin 2                                                                                    |
| LRRC69     | -0.70545 | 0.003532 | 0.046818 | -2.91715 | Down | leucine rich repeat containing 69                                                               |
| RELL1      | -0.7032  | 8.58E-05 | 0.00488  | -3.9275  | Down | RELT like 1                                                                                     |
| NSUN7      | -0.70027 | 0.001059 | 0.022812 | -3.27443 | Down | NOP2/Sun RNA methyltransferase family<br>member 7                                               |
| ARHGDIIB   | -0.69836 | 0.002304 | 0.036366 | -3.048   | Down | Rho GDP dissociation inhibitor beta                                                             |
| CFH        | -0.69765 | 0.003441 | 0.046103 | -2.92528 | Down | complement factor H                                                                             |
| MYL12A     | -0.69462 | 4.86E-06 | 0.000811 | -4.57064 | Down | myosin light chain 12A                                                                          |
| ERBIN      | -0.69442 | 0.000715 | 0.017971 | -3.38388 | Down | erbb2 interacting protein                                                                       |

|            |          |          |          |          |      |                                                                                                  |
|------------|----------|----------|----------|----------|------|--------------------------------------------------------------------------------------------------|
| EMX2       | -0.69429 | 0.003395 | 0.045586 | -2.92954 | Down | empty spiracles homeobox 2                                                                       |
| BTNL9      | -0.69017 | 0.000942 | 0.021452 | -3.30735 | Down | butyrophilin like 9                                                                              |
| YAP1       | -0.68979 | 0.00042  | 0.013385 | -3.52694 | Down | Yes1 associated transcriptional regulator<br>FXYP domain containing ion transport<br>regulator 3 |
| FXYP3      | -0.68949 | 0.001038 | 0.02264  | -3.27999 | Down |                                                                                                  |
| GIMAP5     | -0.68807 | 0.00057  | 0.015579 | -3.44569 | Down | GTPase, IMAP family member 5                                                                     |
| CCDC146    | -0.68789 | 4.59E-05 | 0.003402 | -4.07572 | Down | coiled-coil domain containing 146                                                                |
| CFAP53     | -0.68727 | 5.83E-05 | 0.003929 | -4.01977 | Down | cilia and flagella associated protein 53                                                         |
| TGFBR2     | -0.68671 | 3.19E-05 | 0.002706 | -4.15973 | Down | transforming growth factor beta receptor 2                                                       |
| DOK3       | -0.68462 | 0.00173  | 0.030651 | -3.13305 | Down | docking protein 3                                                                                |
| ZNF69      | -0.68415 | 1.40E-05 | 0.001651 | -4.34323 | Down | zinc finger protein 69                                                                           |
| ACTL6A     | -0.68377 | 4.98E-05 | 0.003585 | -4.05673 | Down | actin like 6A                                                                                    |
| CASP6      | -0.68288 | 8.88E-05 | 0.005029 | -3.9192  | Down | caspase 6                                                                                        |
| MTND5P14   | -0.68088 | 0.00295  | 0.041993 | -2.97287 | Down | MT-ND5 pseudogene 14                                                                             |
| PPP1R1C    | -0.68049 | 0.001461 | 0.027926 | -3.18222 | Down | protein phosphatase 1 regulatory inhibitor<br>subunit 1C                                         |
| LCP2       | -0.67819 | 0.000343 | 0.011874 | -3.58048 | Down | lymphocyte cytosolic protein 2                                                                   |
| AKR1C3     | -0.67594 | 1.11E-05 | 0.001414 | -4.39461 | Down | aldo-keto reductase family 1 member C3                                                           |
| SPATA13    | -0.67468 | 0.003858 | 0.049465 | -2.88955 | Down | spermatogenesis associated 13                                                                    |
| MYD88      | -0.67369 | 0.002587 | 0.038945 | -3.01293 | Down | MYD88 innate immune signal transduction<br>adaptor                                               |
| CHEK2      | -0.66927 | 0.00278  | 0.040598 | -2.99109 | Down | checkpoint kinase 2                                                                              |
| RHOJ       | -0.66873 | 6.48E-05 | 0.004108 | -3.9946  | Down | ras homolog family member J                                                                      |
| COA6-AS1   | -0.66868 | 0.000421 | 0.013385 | -3.52638 | Down | COA6 antisense RNA 1<br>mixed lineage kinase domain like<br>pseudokinase                         |
| MLKL       | -0.666   | 0.003595 | 0.047364 | -2.91165 | Down |                                                                                                  |
| MRPS6      | -0.66587 | 0.001673 | 0.030016 | -3.14293 | Down | mitochondrial ribosomal protein S6                                                               |
| ST6GALNAC3 | -0.66489 | 1.45E-05 | 0.001698 | -4.33614 | Down | ST6 N-acetylgalactosaminide alpha-2,6-<br>sialyltransferase 3                                    |
| PLIN2      | -0.66475 | 0.002388 | 0.037204 | -3.03717 | Down | perilipin 2                                                                                      |
| NFKBIA     | -0.66411 | 0.000812 | 0.019576 | -3.34874 | Down | NFKB inhibitor alpha                                                                             |
| APOL1      | -0.66315 | 0.001705 | 0.030405 | -3.1373  | Down | apolipoprotein L1<br>procollagen-lysine,2-oxoglutarate 5-<br>dioxxygenase 2                      |
| PLOD2      | -0.66265 | 0.000314 | 0.011194 | -3.60308 | Down |                                                                                                  |
| ARHGAP11A  | -0.66221 | 0.001076 | 0.023023 | -3.26985 | Down | Rho GTPase activating protein 11A                                                                |
| ANO6       | -0.66169 | 2.28E-07 | 9.65E-05 | -5.17488 | Down | anoctamin 6                                                                                      |
| CYTB       | -0.66104 | 0.001875 | 0.032169 | -3.1093  | Down | cytochrome b                                                                                     |
| IL13RA1    | -0.65993 | 0.001574 | 0.029074 | -3.1606  | Down | interleukin 13 receptor subunit alpha 1<br>IQ motif containing GTPase activating<br>protein 1    |
| IQGAP1     | -0.65637 | 9.92E-05 | 0.005384 | -3.89251 | Down |                                                                                                  |
| RGCC       | -0.65607 | 0.003337 | 0.045254 | -2.93485 | Down | regulator of cell cycle                                                                          |
| SLFN11     | -0.65581 | 0.000121 | 0.006039 | -3.8444  | Down | schlafen family member 11                                                                        |
| GIMAP8     | -0.65478 | 0.002585 | 0.038945 | -3.01324 | Down | GTPase, IMAP family member 8                                                                     |
| ND1        | -0.6541  | 0.000445 | 0.013652 | -3.51179 | Down | NADH dehydrogenase subunit 1                                                                     |
| ITGB8      | -0.6535  | 0.000246 | 0.009491 | -3.66629 | Down | integrin subunit beta 8                                                                          |
| NEK7       | -0.65261 | 2.51E-05 | 0.002324 | -4.21401 | Down | NIMA related kinase 7                                                                            |
| LOC646870  | -0.65136 | 0.000194 | 0.008201 | -3.72666 | Down | centrosomal protein 57kDa pseudogene<br>tumor protein p53 inducible nuclear protein<br>1         |
| TP53INP1   | -0.64796 | 0.000143 | 0.00676  | -3.80349 | Down |                                                                                                  |

|              |          |          |          |          |      |                                                                                              |
|--------------|----------|----------|----------|----------|------|----------------------------------------------------------------------------------------------|
| ITGB1        | -0.64777 | 6.21E-07 | 0.000192 | -4.98444 | Down | integrin subunit beta 1                                                                      |
| LPAR6        | -0.64728 | 0.000596 | 0.015964 | -3.4335  | Down | lysophosphatidic acid receptor 6                                                             |
| ZNF761       | -0.64725 | 1.93E-05 | 0.002007 | -4.2733  | Down | zinc finger protein 761                                                                      |
| LOC100421091 | -0.64546 | 0.000166 | 0.007394 | -3.76532 | Down | LSM14A, SCD6 homolog A (S. cerevisiae) pseudogene                                            |
| CSF1         | -0.64529 | 0.002899 | 0.04168  | -2.97826 | Down | colony stimulating factor 1                                                                  |
| ANXA5        | -0.64132 | 8.08E-06 | 0.001129 | -4.46296 | Down | annexin A5                                                                                   |
| IKZF2        | -0.64039 | 0.001613 | 0.02946  | -3.15346 | Down | IKAROS family zinc finger 2                                                                  |
| TBC1D8B      | -0.6399  | 0.000598 | 0.015989 | -3.43257 | Down | TBC1 domain family member 8B                                                                 |
| KIF5B        | -0.63975 | 2.35E-05 | 0.002246 | -4.2287  | Down | kinesin family member 5B                                                                     |
| ITPKB        | -0.63935 | 0.000145 | 0.006837 | -3.79929 | Down | inositol-trisphosphate 3-kinase B                                                            |
| PLSCR1       | -0.63878 | 0.00224  | 0.035881 | -3.05639 | Down | phospholipid scramblase 1                                                                    |
| ANXA1        | -0.63755 | 0.00078  | 0.019048 | -3.35997 | Down | annexin A1                                                                                   |
| SUMO4        | -0.63589 | 0.001198 | 0.024671 | -3.23938 | Down | small ubiquitin like modifier 4 family with sequence similarity 241 member A                 |
| FAM241A      | -0.63536 | 0.003158 | 0.043801 | -2.95189 | Down | nuclear speckle splicing regulatory protein 1 pseudogene 1                                   |
| NSRP1P1      | -0.63413 | 0.000589 | 0.015912 | -3.4366  | Down |                                                                                              |
| PMP2         | -0.63346 | 0.001478 | 0.028041 | -3.17901 | Down | peripheral myelin protein 2                                                                  |
| KCNJ10       | -0.63343 | 0.001796 | 0.031296 | -3.12205 | Down | potassium inwardly rectifying channel subfamily J member 10                                  |
| SAMHD1       | -0.63146 | 1.30E-06 | 0.000341 | -4.83977 | Down | SAM and HD domain containing deoxynucleoside triphosphate triphosphohydrolase 1              |
| TMEM14EP     | -0.63138 | 0.000121 | 0.006039 | -3.84458 | Down | transmembrane protein 14E, pseudogene                                                        |
| LEF1         | -0.63073 | 8.44E-06 | 0.001155 | -4.45382 | Down | lymphoid enhancer binding factor 1                                                           |
| NOSTRIN      | -0.62991 | 0.00105  | 0.022738 | -3.27691 | Down | nitric oxide synthase trafficking                                                            |
| ITGA8        | -0.62808 | 0.000273 | 0.010246 | -3.64006 | Down | integrin subunit alpha 8                                                                     |
| MAML2        | -0.62779 | 7.54E-06 | 0.001091 | -4.47797 | Down | mastermind like transcriptional coactivator 2                                                |
| MLANA        | -0.62711 | 0.000748 | 0.018602 | -3.37145 | Down | melan-A                                                                                      |
| CLEC2D       | -0.62491 | 0.002356 | 0.036894 | -3.04126 | Down | C-type lectin domain family 2 member D spectrin repeat containing nuclear envelope protein 2 |
| SYNE2        | -0.62484 | 7.58E-06 | 0.001092 | -4.47673 | Down |                                                                                              |
| CD2AP        | -0.62425 | 1.01E-05 | 0.001309 | -4.41534 | Down | CD2 associated protein                                                                       |
| REST         | -0.62394 | 0.000525 | 0.014965 | -3.46775 | Down | RE1 silencing transcription factor                                                           |
| ELK3         | -0.62299 | 4.03E-06 | 0.000738 | -4.61006 | Down | ETS transcription factor ELK3                                                                |
| PGR          | -0.62281 | 0.001617 | 0.029482 | -3.15285 | Down | progesterone receptor                                                                        |
| VIM          | -0.62236 | 0.001679 | 0.030082 | -3.14177 | Down | vimentin                                                                                     |
| TSHR         | -0.62199 | 0.000904 | 0.020993 | -3.31878 | Down | thyroid stimulating hormone receptor                                                         |
| XAF1         | -0.62128 | 0.000121 | 0.006039 | -3.84505 | Down | XIAP associated factor 1                                                                     |
| GIMAP6       | -0.62121 | 0.000774 | 0.018941 | -3.36196 | Down | GTPase, IMAP family member 6                                                                 |
| DDX58        | -0.62027 | 1.67E-05 | 0.001876 | -4.30478 | Down | DEXD/H-box helicase 58                                                                       |
| TGFB3        | -0.61949 | 0.001004 | 0.022146 | -3.2895  | Down | transforming growth factor beta 3                                                            |
| MARCHF3      | -0.61945 | 0.00136  | 0.026659 | -3.20294 | Down | membrane associated ring-CH-type finger 3                                                    |
| SASH1        | -0.61737 | 4.39E-05 | 0.003291 | -4.08595 | Down | SAM and SH3 domain containing 1                                                              |
| AHNAK        | -0.61676 | 0.000812 | 0.019576 | -3.34851 | Down | AHNAK nucleoprotein                                                                          |
| SLC19A3      | -0.61615 | 0.000237 | 0.009338 | -3.67641 | Down | solute carrier family 19 member 3                                                            |
| PPP1R3B      | -0.61536 | 5.67E-05 | 0.003847 | -4.02609 | Down | protein phosphatase 1 regulatory subunit 3B                                                  |



|       |          |          |          |          |      |                                    |
|-------|----------|----------|----------|----------|------|------------------------------------|
| LRP4  | -0.61454 | 0.002676 | 0.039743 | -3.00264 | Down | LDL receptor related protein 4     |
| S1PR3 | -0.61377 | 0.001065 | 0.022901 | -3.27289 | Down | sphingosine-1-phosphate receptor 3 |
| ZBED6 | -0.61217 | 1.05E-06 | 0.000296 | -4.8821  | Down | zinc finger BED-type containing 6  |
| RP2   | -0.61043 | 1.83E-05 | 0.001932 | -4.28492 | Down | RP2 activator of ARL3 GTPase       |

**Table 2** The enriched GO terms of the up and down regulated differentially expressed genes

| GO ID                     | CATEGORY | GO Name                    | Adjusted p value | negative log10 of adjusted p value | Gene Count | Gene                                                                                                                                                                                                                                                                                                                                                                                                                                                                                                                                                                                                                                                                                                                                                                                                                                              |
|---------------------------|----------|----------------------------|------------------|------------------------------------|------------|---------------------------------------------------------------------------------------------------------------------------------------------------------------------------------------------------------------------------------------------------------------------------------------------------------------------------------------------------------------------------------------------------------------------------------------------------------------------------------------------------------------------------------------------------------------------------------------------------------------------------------------------------------------------------------------------------------------------------------------------------------------------------------------------------------------------------------------------------|
| <b>Up regulated genes</b> |          |                            |                  |                                    |            |                                                                                                                                                                                                                                                                                                                                                                                                                                                                                                                                                                                                                                                                                                                                                                                                                                                   |
| GO:0007399                | BP       | nervous system development | 5.45E-09         | 8.263687154                        | 99         | EGR2, ATOH7, WNT1, ARC, IGFN1, ADCYAP1, LRTM2, SCN5A, RTN4R, SLC32A1, NNAT, NEUROD6, CHRNA7, NRG, CHRM1, TUBB2A, OVOL2, SPINT2, EFNB3, CCK, HP, CA, CDK5R2, ADAMTSL1, CPNE6, MAL2, KCNK3, SEZ6L2, IL1RAPL2, SLC6A17, INSM1, WNT10B, PCDHAC2, CDH22, RGS4, SEZ6, NGEF, DOC2A, PLK2, SCN3B, PER2, RNF165, ECRG4, LINGO1, TAGLN3, CLSTN3, LZTS1, PAK6, IGSF8, PAK1, SCN2B, SYNGR3, PCDH1, TRIM67, NRSN1, ADGRB2, STMN3, TENM2, PCDH19, NRN1, UNC5D, PRKCG, MEF2D, CX3CL1, NBL1, CA10, EN, C1, VSTM5, NRSN2, CNTNAP2, CAMK1, ETV5, CALM3, SLC12A5, PIN1, NECTIN1, GAS7, NDN, NTNG1, RAB3A, KATNB1, STXBP1, SLC8A3, CHRN2, RND1, SLC17A7, NAPA, NELL1, RET, UNC13A, NME1, STX1B, CDK5, SNRPB, HTR5A, HPCAL4, ACTL6B, NRE, P, GABRG2, CITED2                                                                                                            |
| GO:0007154                | BP       | cell communication         | 1.42095E-05      | 4.847421834                        | 191        | NMBR, EGR2, PNOC, EGR1, ASB2, MYLK2, C1QTNF4, GNG3, IL11, WNT1, RGS8, NXPH2, CALY, CCKBR, DUSP2, HTR3B, ARC, NPBWR2, ADCYAP1, NCALD, RHEBL1, SPEF1, GABRD, MUC5B, CACNA1G, P, CSK1, FCRLB, SCN5A, IGFBP2, RH, OV, HTR2C, TAMALIN, SPRED3, RBP4, FFAR4, RTN4R, ADTRP, SLC32A1, NNAT, ADRA1D, PPEF1, CHRNA7, MCHR2, GJD2, PLPPR3, MAP1LC3A, HPX, REM2, STX1A, NRG, RPH3A, CHRM4, CHRM1, MUC6, GRM2, SYT5, BAIAP3, OPRL1, OVOL2, LBH, EFNB3, CCK, DIRAS1, ERFE, HPCA, TRIM54, GNG13, SLC1A6, CPNE6, ARHGAP10, RASL10A, KCNK3, SEZ6L2, IL1RAPL2, WNT10B, NPTX2, SYT13, SLC8A2, GPR88, NSG2, NPTXR, HIPK4, RGS4, SEZ6, CACNB1, NGEF, DOC2A, PLK2, SCN3B, PER2, EXTL1, RNF165, IL1RL2, NUA1, FAM83H, CAMKK2, RHBDD2, CLSTN3, LZTS1, SYT12, PAK6, DCTPP1, SPRYD3, KCNIP3, SYP, ATP6V0E2, PAK1, SCN2B, CORO1A, PCDH1, TRIM67, DLK2, ADGRB2, RHOBTB2, TMEM |

|            |    |               |          |             |     |                                                                                                                                                                                                                                                                                                                                                                                                                                                                                                                                                                                                                                                                                                                                                                                                                                                                                                                                                                                                                                                                                                                                                                        |
|------------|----|---------------|----------|-------------|-----|------------------------------------------------------------------------------------------------------------------------------------------------------------------------------------------------------------------------------------------------------------------------------------------------------------------------------------------------------------------------------------------------------------------------------------------------------------------------------------------------------------------------------------------------------------------------------------------------------------------------------------------------------------------------------------------------------------------------------------------------------------------------------------------------------------------------------------------------------------------------------------------------------------------------------------------------------------------------------------------------------------------------------------------------------------------------------------------------------------------------------------------------------------------------|
| GO:0030054 | CC | cell junction | 7.04E-16 | 15.15260462 | 105 | <p>38A,VAMP2,STMN3,ATP1A3,NSG1,PTPN3,TENM2,RIMS3,SV2A,CAMK4,UNC5D,ATP6V0B,VIPR1,PPP2R1A,CACNG3,PRKCG,TRIB3,RAB40C,EMD,CX3CL1,PRKAR1B,NBL1,FNDC5,MN1,ADRA1B,ATP6V1B2,CDH13,GNG4,CNTNAP2,CAMK1,STAT4,CALM3,SLC12A5,PIN1,CDH8,PTPRN,HINT1,PIM2,H4C3,NDN,TSPYL5,CAP2,SYNGR1,DMTN,NTNG1,CRY2,SNCB,RAB3A,STXBP1,SLC8A3,KLHDC3,CHRN2,RND1,AP2M1,ATP6A1,GABARAPL1,PSMB5,SLC17A7,NAPA,ARHGFE9,FIHP,RET,NEURL1B,UNC13A,XK,STX1B,CDK5,HTR5A,HPCAL4,TSZH3,MAST3,NREP,TMEM9,GABRG2,DLG3,ADGRA1,CITED2PNOC,MYLK2,GNG3,SLC30A3,RGS8,CALY,HTR3B,ARC,IGFN1,ADCYAP1,GABRD,CACNA1G,SCN5A,HTR2C,TAMALIN,RTN4R,SLC32A1,SVOP,CHRNA7,GJD2,MAP1LC3A,SH2D5,STX1A,NRGN,RPH3A,CHRM4,CHRM1,GRM2,SYT5,BAIAP3,EFNB3,CCK,HPCA,SLC1A6,CPNE6,KCNK3,IL1RAPL2,SLC6A17,NPTX2,SYT13,CDH22,SLC8A2,NPTXR,SEZ6,CACNB1,DOC2A,CAMKV,CAMKK2,CLSTN3,LZTS1,SYT12,PAK6,KCNIP3,SYP,PAK1,SCN2B,CORO1A,SYNGR3,PCDH1,VAMP2,ATP1A3,NSG1,TENM2,NMNAT2,RIMS3,NRN1,SV2A,CAMK4,CACNG3,PRKCG,RAB40C,PRKAR1B,CDH13,CNTNAP2,CAMK1,CALM3,SLC12A5,NIPSNAP1,PIN1,CDH8,PTPRN,SCAMP5,NECTIN1,CAP2,SYNGR1,DMTN,NTNG1,SNCB,RAB3A,STXBP1,SLC8A3,CHRN2,RND1,AP2M1,PPL,SLC17A7,NAPA,ARHGFE9,UNC13A,STX1B,CDK5,HTR5A,GABRG2,DLG3,ADGRA1</p> |
| GO:0016020 | CC | membrane      | 2.74E-09 | 8.561706218 | 266 | <p>NMBR,KNCN,PNOC,GNG3,SLC30A3,WNT1,TMEM200B,RGS8,CALY,CCKBR,DUSP2,HTR3B,KLHL14,ARC,ARL4D,NPBWR2,KCNF1,NCALD,RHEBL1,FAM241B,SPEF1,GABRD,MUC5B,CACNA1G,NOXA1,LRTM2,PCSK1,FCRLB,SCN5A,IGFBP2,RHOV,HTR2C,SLC10A4,PRSS16,TAMALIN,SPRED3,CTXN1,SLC22A6,TPBGL,FAR4,TRBC2,RTN4R,ICAM5,ADTRP,SLC32A1,PCDHGC5,NNAT,TMEM59L,SVOP,KCNH4,ADRA1D,CHRNA7,MCHR2,GJD2,PLPPR3,MAP1LC3A,BEST4,TMEM221,REM2,STX1A,NRGN,FLG,RPH3A,ABCC11,CHRM4,CHRM1,MUC6,GRM2,SYT5,BAIAP3,FAM163B,ABCC12,OPRL1,SPINT2,EFNB3,SLC22A17,HAS1,DIRAS1,HPCA,GNG13,CDK5R2,SLC1A6,GALNT17,ADAMTSL1,CPNE6,ARF5,ARHGDIG,MAL2,COX8A,RASL10A,CALHM1,SLC7A4,KCNK3,SE</p>                                                                                                                                                                                                                                                                                                                                                                                                                                                                                                                                               |

|            |    |                      |             |             |     |                                                                                                                                                                                                                                                                                                                                                                                                                                                                                                                                                                                                                                                                                                                                                                                                                                                                                                                                                                                                                                                                                                                                                                                                                                                                                                                                                                                                                                                                                                                                                                                                                                                                                                                                                                                               |
|------------|----|----------------------|-------------|-------------|-----|-----------------------------------------------------------------------------------------------------------------------------------------------------------------------------------------------------------------------------------------------------------------------------------------------------------------------------------------------------------------------------------------------------------------------------------------------------------------------------------------------------------------------------------------------------------------------------------------------------------------------------------------------------------------------------------------------------------------------------------------------------------------------------------------------------------------------------------------------------------------------------------------------------------------------------------------------------------------------------------------------------------------------------------------------------------------------------------------------------------------------------------------------------------------------------------------------------------------------------------------------------------------------------------------------------------------------------------------------------------------------------------------------------------------------------------------------------------------------------------------------------------------------------------------------------------------------------------------------------------------------------------------------------------------------------------------------------------------------------------------------------------------------------------------------|
| GO:0005215 | MF | transporter activity | 3.51636E-06 | 5.453906623 | 56  | Z6L2,GOLGA8B,MRPS12,IL1RA<br>PL2,SLC6A17,SLC22A24,DNAJC<br>5G,SLC6A7,SYT13,PCDHAC2,C<br>DH22,SLC45A1,SLC8A2,PRMT8,<br>GPR88,IGSF3,TUBA1B,MARCHF<br>4,NSG2,NPTXR,STUM,RGS4,SE<br>Z6,CACNB1,NGEF,DOC2A,INTS<br>5,SCN3B,CAMKV,PLD3,CYS1,E<br>XTL1,ECRG4,IL1RL2,LINGO1,F<br>XYD7,TIMM13,RHBDD2,CLSTN<br>3,LZTS1,SYT12,ENO2,KCNIP3,S<br>YP,HPCAL1,ATP6V0E2,STOML1<br>,IGSF8,PAK1,ST6GAL2,SCN2B,C<br>ORO1A,SYNGR3,PCDH1,PPP1R1<br>4C,DLK2,PIGZ,NRSN1,NAT14,A<br>DGRB2,TMIE,RHOBTB2,TMEM<br>38A,VAMP2,ATP1A3,NSG1,KCN<br>B2,PTPN3,TENM2,PCDH19,NMN<br>AT2,RIMS3,NRN1,SV2A,UNC5D,<br>SHISAL1,ATP6V0B,C1ORF115,V<br>IPR1,PPP2R1A,CACNG3,PRKCG,<br>BFSP1,DNAL4,TRIB3,RAB40C,E<br>MD,CX3CL1,PRKAR1B,VSTM5,<br>NRSN2,PARM1,FNDC5,ADRA1B<br>,NDUFA4,MICOS13,ATP6V1B2,<br>CDH13,GNG4,EFR3B,CNTNAP2,<br>GGT7,FLRT1,KIF17,RAB36,CAL<br>M3,SLC12A5,NIPSNAP1,ATP5M<br>C1,C11ORF87,ARF3,ATP5F1B,C<br>DH8,PTPRN,C3ORF80,PCDHGC4<br>,SCAMP5,SYT16,HINT1,CYC1,Y<br>IF1B,NECTIN1,PGAP3,GAS7,H4<br>C3,PODXL2,MELTF,CDIPT,CAP<br>2,SYNGR1,API51,DMTN,PIANP,<br>PPOX,NTNG1,ASS1,RAB3A,B4G<br>AT1,KATNB1,STXBP1,SLC8A3,<br>CHRN2,RND1,AP2M1,PTPN5,A<br>TP6AP1,GABARAPL1,PPL,SLC1<br>7A7,NAPA,APBB3,TIMM17B,CP<br>NE7,FIBP,RET,UNC13A,CD200,<br>XK,NME1,STX1B,CDK5,HTR5A,<br>PEF1,RUSF1,TSHZ3,TMEM178B,<br>FAM234B,TMEM9,GABRG2,DL<br>G3,CYRIA,ADGRA1,KCNS2<br>SLC30A3,HTR3B,KCNF1,GABR<br>D,CACNA1G,SCN5A,SLC10A4,A<br>DAMTS8,RBP4,SLC22A6,SLC32<br>A1,SVOP,KCNH4,CHRNA7,GJD2<br>,BEST4,HPX,ABCC11,ABCC12,S<br>LC22A17,SLC1A6,CPNE6,COX8<br>A,CALHM1,SLC7A4,KCNK3,SL<br>C6A17,SLC22A24,SLC6A7,SLC4<br>5A1,SLC8A2,CACNB1,SCN3B,K<br>CNIP3,ATP6V0E2,SCN2B,TMEM<br>38A,ATP1A3,KCNB2,SV2A,ATP6<br>V0B,CACNG3,NDUFA4,ATP6V1<br>B2,SLC12A5,ATP5MC1,ATP5F1<br>B,SLC8A3,CHRN2,SLC17A7,TI<br>MM17B,CPNE7,XK,CDK5,GABR<br>G2,KCNS2 |
| GO:0005515 | MF | protein binding      | 0.03867521  | 1.412567324 | 331 | EGR2,PNOC,EGR1,ATOH7,ASB2<br>,H1-<br>7,MYLK2,C1QTNF4,GNG3,IL11,<br>SLC30A3,WNT1,RGS8,NXP2,S<br>PATA2L,MPO,CALY,CCKBR,DU<br>SP2,CCDC184,KLHL14,ARC,AR<br>L4D,NPBWR2,IGFN1,ADCYAP1,<br>CCNO,SPAG6,KCNF1,NCALD,R<br>HEBL1,FAM241B,CRYM,PNMA<br>5,SPEF1,GABRD,MUC5B,OTOG                                                                                                                                                                                                                                                                                                                                                                                                                                                                                                                                                                                                                                                                                                                                                                                                                                                                                                                                                                                                                                                                                                                                                                                                                                                                                                                                                                                                                                                                                                                          |

L,CACNA1G,NOXA1,LRTM2,PCSK1,SCN5A,IGFBP2,RHOV,LOXHD1,EMILIN3,HTR2C,SLC10A4,ADAMTS8,TAMALIN,SPRED3,RBP4,SLC22A6,TPBGL,FFAR4,RTN4R,ICAM5,ADTRP,SVOP,NEUROD6,ADRA1D,PPEF1,CHRNA7,SOWAHB,MAP1LC3A,SH2D5,HYPX,REM2,STX1A,NRGN,FLG,RP3A,CHRM1,MUC6,TUBB2A,GRM2,SYT5,IQCN,DCAF12L2,BAIP3,FAM163B,OPRL1,OVOL2,LBH,EFNB3,CCK,MYOZ3,HSPBP1,SLC22A17,HAS1,DIRAS1,ERFE,HPCA,TRIM54,LRRC73,GNG13,CDK5R2,RCOR2,CPNE6,ARF5,ARRHGDIG,MAL2,COX8A,CALHM1,KCNK3,GOLGA8B,MRPS12,IL1RAPL2,SLC6A17,IQANK1,EXOSC5,INSM1,WNT10B,NPTX2,SYT13,CDH22,KLHL25,SLC8A2,PRMT8,TUBA1B,PSMG3,NSG2,STUM,HIPK4,RGS4,SEZ6,CACNB1,H2AC21,NGEF,DOC2A,USP11,PLK2,INTS5,SCN3B,CAMKV,PLD3,CYS1,NPM3,PER2,EXTL1,RNF165,PYCR3,ECRG4,ZNF843,IL1RL2,NUAK1,LINGO1,FXND7,TIMM13,TAGLN3,FAM83H,CAMKK2,HBDD2,RTL8C,CLSTN3,LZTS1,ASMTL,SYT12,PAK6,ENO2,DCTPP1,RBM3,CHCHD2,SPRYD3,KCNIP3,SYP,HPCAL1,STOML1,IGSF8,PAK1,ST6GAL2,PNCK,CORO1A,SYNGR3,POP7,TRIM67,DLK2,NRSN1,CCNA1,ADGRB2,CIRBP,TBCC,RHOB2,TMEM38A,VAMP2,STMN3,ATP1A3,NSG1,KCNB2,NLRP1,TUBA4A,PTPN3,TENM2,RIMS3,SV2A,CAMK4,COPS7A,UNC5D,HR,SHISA1,ATP6V0B,PNMA3,VIPR1,PPP2R1A,LAMB3,CACNG3,PRKCG,BFSP1,MEF2D,DNAL4,TRIB3,EMD,SULT4A1,CX3CL1,PRKAR1B,NBL1,ENC1,NRSN2,PARM1,FNDC5,KLHL26,MN1,ADRA1B,NDUFA4,MICOS13,ATP6V1B2,CDH13,GNG4,EFR3B,CNTNAP2,SPIN2B,GGT7,CAMK1,ETV5,FLRT1,KIF17,RAB36,STAT4,CALM3,SLC12A5,NRIP3,NIPSNAP1,PIN1,PHYHIP,ATP5MC1,C11ORF87,ARF3,ATP5F1B,CDH8,PTPRN,SCAMP5,SYT16,HINT1,CYC1,NAA80,YIF1B,NECTIN1,ACOT7,PGAP3,GAS7,PIM2,H4C3,NDN,PODXL2,IER5,TSPYL5,DMKN,MELTF,CDIPT,CAP2,SYNGR1,DMTN,PIANP,NTNG1,CRY2,SNCB,ASS1,RAB3A,B4GAT1,KATNB1,STXBP1,SLC8A3,RNF187,OTUB1,KLHDC3,CHRN2,RND1,AP2M1,SNU13,PTPN5,ATP6AP1,GABARAPL1,PPL,PSMB5,NAPA,APBB3,TIMM17B,ZNF710,NELL1,ZMYND12,TRIM66,ARRHGEF9,CPNE7,FIBP,RET,TRAPPC1,NEURL1B,GPRASP2,UNC13A,CD200,XK,NME1,CCDC113,STX1B,CDK5,SNRPB,HPCAL4,MB2

|                             |    |                      |          |            |     | 1D2,PEF1,RUSF1,TSPYL4,TSHZ3,<br>MAST3,NREP,TMEM9,GABRG2,<br>DLG3,CYRIA,KCNS2,CITED2                                                                                                                                                                                                                                                                                                                                                                                                                                                                                                                                                                                                                                                                                                                                                                                                                                                                                                                                                                                                                                                                                                                                                                                                                                                                                                                                                                                                                                                                                                                                                                                 |
|-----------------------------|----|----------------------|----------|------------|-----|---------------------------------------------------------------------------------------------------------------------------------------------------------------------------------------------------------------------------------------------------------------------------------------------------------------------------------------------------------------------------------------------------------------------------------------------------------------------------------------------------------------------------------------------------------------------------------------------------------------------------------------------------------------------------------------------------------------------------------------------------------------------------------------------------------------------------------------------------------------------------------------------------------------------------------------------------------------------------------------------------------------------------------------------------------------------------------------------------------------------------------------------------------------------------------------------------------------------------------------------------------------------------------------------------------------------------------------------------------------------------------------------------------------------------------------------------------------------------------------------------------------------------------------------------------------------------------------------------------------------------------------------------------------------|
| <b>Down regulated genes</b> |    |                      |          |            |     |                                                                                                                                                                                                                                                                                                                                                                                                                                                                                                                                                                                                                                                                                                                                                                                                                                                                                                                                                                                                                                                                                                                                                                                                                                                                                                                                                                                                                                                                                                                                                                                                                                                                     |
| GO:0050896                  | BP | response to stimulus | 1.02E-12 | 11.9923796 | 272 | TOP2A,DLGAP5,CEP55,MELK,NDC80,VNN1,OR7A5,BCL2A1,CHI3L1,OR7C1,IL9,SHISA3,STC1,ANGPT2,MCM10,FPR2,S100A9,TLR8,MMRN1,SERPINA1,KIF14,MT1G,OR52B6,CDA,CCR5,TTK,NOD2,PLAC8,MT1F,GBP1,GBP5,GBP2,HPGD,C7,S100A4,OR51B5,MGAM,CD180,CDK1,C1QB,KLRC3,SPP1,FCGR3A,DDIT4L,SAMSN1,AZGP1,TLR7,TNFRSF10D,FYB1,SLFN13,HGF,TRIP10,PPEF2,TLR5,SULT1B1,TFPI,TLR2,MNDA,RUNX3,PTPRC,LVRN,C3,INSL6,IL2RG,MT1M,CLEC2B,CFLNIBAN1,CENPF,PIK3AP1,TRIM5,JAML,NUPR1,E2F7,FCGR2A,CYSLTR2,HORMAD1,ALOX5AP,S100A11,ADAMDEC1,LAMP3,P2RY6,FICER1G,MICB,IFI16,SELL,LAPTM5,FKBP5,CASP4,NMI,ALKAL2,IFNE,ADGRL4,SYK,CGAS,GLI1,LCP1,MT2A,LY75,MT1X,IL17RB,GPR4,SPN,DTX3L,CYBB,TLR1,NEFH,GABRE,SRGN,CELSR1,NCKAP1L,PARP9,GBP3,TRIM38,SAASH3,SP100,CLIC1,IKBIP,APBB1IP,OSMR,SLA,MT1E,PDK4,NFATC2,GNRH1,MAFF,CD34,CCNA2,BRCA2,HCLS1,RAB13,TFEC,PIK3CG,GBP4,CSF3R,GPNMB,ITGB3,ND3,ANXA3,MAP3K8,PERP,FAM111A,CDK2,PTAFR,ORC1,YES1,NCF2,CD58,NEXN,RASSF8,TNFSF10,ITGA10,BTK,PRKX,TRIM21,NQO1,FGF11,TEAD2,B2M,TRDN,MYOF,SLC39A12,ADGRE2,ANXA2,FLT1,MECOM,TGFBR1,IRAK3,GNG11,DNA2,CTSS,SLC38A2,HELB,ARHGAP42,HHEX,PCOLCE2,ITGA1,HK2,GPR160,PARP14,NABP1,MSTN,RNF152,EVC2,FBXO5,HEBP2,FOXC1,IFITM3,DOCK2,NEDD4,MEFV,ROM1,IFIH1,ATP6,DDR2,ND4,TPD52L1,BCL6,HERC5,OAS2,COX2,WTR1,RFTN2,ND6,RHOQ,TRIM22,CLDN18,NLRC5,CASP7,MMRN2,LRRC69,RELL1,ARHGDI1B,CFH,MYL12A,ERBIN,EMX2,BTNL9,YAP1,TGFBR2,DOK3,ACTL6A,CASP6,PPP1R1C,LCP2,AKR1C3,MYD88,CHEK2,RHOJ,MLKL,PLIN2,NFKBIA,APOL1,PLOD2,ARHGAP11A,ANO6,CYTB,IL13RA1,IQGAP1,RGCC,SLFN11,ND1,ITGB8,TP53INP1,ITGB1,LPAR6,CSF1,ANXA5,KIF5B,ITPKB,PLSCR1,ANXA1,SUMO4,SAMHD1,LEF1,NOSTRIN,ITGA8,MAML2,CLEC2D,CD2AP,REST,ELK3,PGR,VIAM,TSHR,XAF1,DDX58,TGFB3,ASH1,LRP4,S1PR3,ZBED6 |
| GO:0007154                  | BP | cell communication   | 2.94E-09 | 8.53210726 | 208 | DLGAP5,CEP55,MELK,NDC80,VNN1,OR7A5,BCL2A1,CHI3L1,OR7C1,IL9,SHISA3,STC1,ANGPT2,F                                                                                                                                                                                                                                                                                                                                                                                                                                                                                                                                                                                                                                                                                                                                                                                                                                                                                                                                                                                                                                                                                                                                                                                                                                                                                                                                                                                                                                                                                                                                                                                     |

PR2,S100A9,TLR8,KIF14,OR52B  
6,CDA,CCR5,TTK,NOD2,GBP1,G  
BP2,HPGD,S100A4,OR51B5,CD1  
80,CDK1,SPP1,FCGR3A,DDIT4L,  
TFAP2C,TLR7,TNFRSF10D,FYB  
1,SCN4A,HGF,TRIP10,PPEF2,TL  
R5,TLR2,MNDA,PTPRC,LVRN,C  
3,INSL6,IL2RG,CENPF,PIK3AP1,  
TRIM5,NUPR1,E2F7,FCGR2A,C  
YSLTR2,HORMAD1,S100A11,P2  
RY6,FCER1G,MICB,IFI16,LAPT  
M5,CASP4,NMI,ALKAL2,IFNE,A  
DGRL4,SYK,CGAS,GLI1,LCP1,  
MT2A,IL17RB,GPR4,SPN,DTX3L  
,CYBB,TLR1,GABRE,SRGN,CEL  
SR1,NCKAP1L,PARP9,TRIM38,S  
P100,CLIC1,APBB1IP,OSMR,SL  
A,PDK4,NFATC2,GNRH1,CD34,  
CCNA2,BRCA2,HCLS1,RAB13,PI  
K3CG,CSF3R,GPNMB,ITGB3,M  
AP3K8,PERP,CDK2,PTAFR,ORC  
1,YES1,NCF2,RASSF8,TNFSF10,I  
TGA10,BTK,PRKX,TRIM21,NQO  
1,FGF11,TEAD2,B2M,TRDN,SLC  
39A12,ADGRE2,ANXA2,FLT1,M  
ECOM,TGFBR1,IRAK3,GNG11,D  
NA2,CTSS,SLC38A2,ARHGAP42,  
HHEX,ITGA1,GPR160,PARP14,N  
ABP1,MSTN,RNF152,EVC2,FOX  
C1,IFITM3,DOCK2,NEDD4,MEF  
V,IFIH1,DDR2,TPD52L1,BCL6,O  
AS2,WWTR1,RHOQ,TRIM22,CL  
DN18,NLRC5,MMRN2,LRRRC69,  
RELL1,ARHGDIB,ERBIN,BTNL9  
,YAP1,TGFBR2,DOK3,ACTL6A,  
PPP1R1C,LCP2,AKR1C3,MYD88,  
CHEK2,RHOJ,MLKL,NFKBIA,A  
RHGAP11A,ANO6,IL13RA1,IQG  
AP1,RGCC,ITGB8,TP53INP1,ITG  
B1,LPAR6,CSF1,ANXA5,KIF5B,I  
TPKB,PLSCR1,ANXA1,SUMO4,  
KCNJ10,SAMHD1,LEF1,NOSTRI  
N,ITGA8,MAML2,CLEC2D,CD2  
AP,REST,ELK3,PGR,VIM,TSHR,  
XAF1,DDX58,TGFB3,SASH1,LR  
P4,S1PR3,ZBED6

GO:0071944

CC

cell periphery

9.0448E-06

5.043601216

178

CEP55,MELK,VNN1,OR7A5,CHI  
3L1,OR7C1,STC1,ANGPT2,FPR2,  
S100A9,TLR8,MMRN1,SERPINA  
1,KIF14,KCNE4,OR52B6,CCR5,N  
OD2,VNN2,GBP1,SLC1A7,HPGD  
,C7,S100A4,OR51B5,MGAM,CD1  
80,KIF20A,BOLL,FCGR3A,LAM  
B4,KCNJ15,AZGP1,HMMR,TLR7  
,PRRG4,TNFRSF10D,FYB1,SCN4  
A,TRIP10,TLR5,TFPI,TLR2,PTPR  
C,LVRN,C3,IL2RG,CLEC2B,NIB  
AN1,PIK3AP1,JAML,FCGR2A,C  
YSLTR2,ADAMDEC1,LAMP3,P2  
RY6,FCER1G,MICB,SELL,LAPT  
M5,CASP4,STEAP4,ADGRL4,SY  
K,CGAS,LCP1,LY75,IL17RB,GP  
R4,SPN,CALHM5,CYBB,TLR1,B  
ACE2,GABRE,CELSR1,NCKAP1  
L,CLIC1,APBB1IP,OSMR,SLA,K  
CNJ16,CD34,HCLS1,RAB13,PIK3  
CG,GBP4,CSF3R,GPNMB,ITGB3,  
SLC7A2,ANXA3,PRELP,EMCN,P  
ERP,COL27A1,PTAFR,LIPH,YES  
1,NCF2,CD58,NEXN,TNFSF10,IT



|            |    |           |             |             |     |                                                                                                                                                                                                                                                                                                                                                                                                                                                                                                                                                                                                                                                                                                                                                                                                                                                                                                                                                                                                                                                                                                                                                                                                                                                                                                                                                                                                                                                                                                                                                                                                                                                                                                                                                                                                                                                                                                                                                                                                                                                                                                                                      |
|------------|----|-----------|-------------|-------------|-----|--------------------------------------------------------------------------------------------------------------------------------------------------------------------------------------------------------------------------------------------------------------------------------------------------------------------------------------------------------------------------------------------------------------------------------------------------------------------------------------------------------------------------------------------------------------------------------------------------------------------------------------------------------------------------------------------------------------------------------------------------------------------------------------------------------------------------------------------------------------------------------------------------------------------------------------------------------------------------------------------------------------------------------------------------------------------------------------------------------------------------------------------------------------------------------------------------------------------------------------------------------------------------------------------------------------------------------------------------------------------------------------------------------------------------------------------------------------------------------------------------------------------------------------------------------------------------------------------------------------------------------------------------------------------------------------------------------------------------------------------------------------------------------------------------------------------------------------------------------------------------------------------------------------------------------------------------------------------------------------------------------------------------------------------------------------------------------------------------------------------------------------|
| GO:0005737 | CC | cytoplasm | 0.003121618 | 2.505620241 | 280 | GA10,BTK,B2M,TRDN,MYOF,S<br>LC39A12,ADGRE2,ANXA2,ADA<br>M28,FLT1,TGFBR1,IRAK3,GNG1<br>1,CTSS,SLC38A2,LPCAT2,CALD<br>1,DIO1,ITGA1,HK2,GPR160,PAR<br>P14,EVC2,CD302,IFITM3,NEDD4<br>,ROM1,DDR2,ATP11C,WWTR1,T<br>ES,RFTN2,RHOQ,SLC5A9,CLDN<br>18,MMRN2,RELL1,ERBIN,BTNL<br>9,TGFBR2,DOK3,ACTL6A,LCP2,<br>MYD88,RHOJ,MLKL,PLIN2,NFK<br>BIA,ANO6,IL13RA1,IQGAP1,ITG<br>B8,ITGB1,LPAR6,CSF1,ANXA5,<br>PLSCR1,ANXA1,KCNJ10,SAMH<br>D1,NOSTRIN,ITGA8,MLANA,CL<br>EC2D,SYNE2,CD2AP,VIM,TSHR<br>,DDX58,TGFB3,AHNAK,SLC19A<br>3,LRP4,S1PR3,RP2<br>TOP2A,DLGAP5,CEP55,RRM2,H<br>JURP,MELK,NDC80,VNN1,BCL2<br>A1,CHI3L1,SHISA3,STC1,KNL1,<br>FPR2,SGO1,S100A9,TLR8,MMR<br>N1,SERPINA1,KIF14,MT1G,CDA<br>,CCR5,TTK,NOD2,PLAC8,MT1F,<br>GBP1,MS4A6A,GBP5,GBP2,HPG<br>D,S100A4,MGAM,PLA1A,KIF20<br>A,CDK1,BOLL,SPP1,DDIT4L,TM<br>PRSS12,SAMSN1,TNFAIP8,TFAP<br>2C,HMMR,TLR7,PRRG4,REP15,F<br>YB1,SLFN13,HGF,TRIP10,PPEF2<br>,SULT1B1,TFPI,TLR2,MNDA,RU<br>NX3,PTPRC,LVRN,C3,IL2RG,MT<br>1M,NIBAN1,GAS2L3,DNAH11,C<br>ENPF,PIK3AP1,TRIM5,GIMAP4,<br>NUPR1,NUSAP1,FCGR2A,ALOX<br>5AP,NEB,S100A11,LAMP3,HIGD<br>1B,FCER1G,SMTN,IFI16,SELL,L<br>APTM5,FKBP5,DIAPH3,CASP4,<br>NMI,STEAP4,ADGRL4,SYK,CG<br>AS,GLI1,LCP1,MT2A,MT1X,ATP<br>8,RANBP3L,DTX3L,SAMD9,CY<br>BB,TLR1,NEFH,BACE2,SRGN,N<br>CKAP1L,PARP9,GBP3,TRIM38,S<br>ASH3,CEP152,SP100,CLIC1,IKBI<br>P,APBB1IP,SAMD9L,SLA,MT1E,<br>PDK4,NFATC2,GNRH1,MAFF,C<br>D34,CCNA2,BRCA2,HCLS1,RAB<br>13,PIK3CG,SLC25A48,GIMAP7,E<br>HF,GBP4,GPNMB,ITGB3,ND3,A<br>NXA3,MAP3K8,PRELP,PERP,FA<br>M111A,COL27A1,CDK2,PTAFR,<br>GIMAP2,ORC1,YES1,NCF2,CD58<br>,NEXN,BTK,PRKX,TRIM21,NQO<br>1,FGF11,TEAD2,B2M,TRDN,MY<br>OF,SLC39A12,ANXA2,ADAM28,<br>FLT1,MECOM,TGFBR1,IRAK3,G<br>NG11,FLI1,DNA2,CTSS,SLC38A<br>2,LPCAT2,HELB,HHEX,CALD1,<br>ZIC2,ACSS3,DIO1,ITGA1,HK2,N<br>D4L,SQOR,PARP14,NABP1,MST<br>N,RNF152,EVC2,FBXO5,HEBP2,<br>SAMD4A,FOXC1,CD302,IFITM3,<br>DOCK2,NEDD4,DBI,MEFV,IFIH<br>1,ATP6,HMG5,ND4,TPD52L1,B<br>CL6,HERC5,OAS2,LRRRC1,COX2,<br>ATP11C,WWTR1,TES,ND6,RHO<br>Q,CNTLN,TRIM22,ND2,DSE,NL<br>RC5,CASP7,ARHGDIB,MYL12A,<br>ERBIN,YAP1,GIMAP5,CCDC146,<br>TGFBR2,DOK3,CASP6,PPP1R1C, |
|------------|----|-----------|-------------|-------------|-----|--------------------------------------------------------------------------------------------------------------------------------------------------------------------------------------------------------------------------------------------------------------------------------------------------------------------------------------------------------------------------------------------------------------------------------------------------------------------------------------------------------------------------------------------------------------------------------------------------------------------------------------------------------------------------------------------------------------------------------------------------------------------------------------------------------------------------------------------------------------------------------------------------------------------------------------------------------------------------------------------------------------------------------------------------------------------------------------------------------------------------------------------------------------------------------------------------------------------------------------------------------------------------------------------------------------------------------------------------------------------------------------------------------------------------------------------------------------------------------------------------------------------------------------------------------------------------------------------------------------------------------------------------------------------------------------------------------------------------------------------------------------------------------------------------------------------------------------------------------------------------------------------------------------------------------------------------------------------------------------------------------------------------------------------------------------------------------------------------------------------------------------|

|            |    |                               |             |             |    |                                                                                                                                                                                                                                                                                                                                                                                                                                                                                    |
|------------|----|-------------------------------|-------------|-------------|----|------------------------------------------------------------------------------------------------------------------------------------------------------------------------------------------------------------------------------------------------------------------------------------------------------------------------------------------------------------------------------------------------------------------------------------------------------------------------------------|
| GO:0042802 | MF | identical protein binding     | 3.95963E-05 | 4.40234582  | 80 | LCP2,AKR1C3,MYD88,CHEK2,RHOJ,MLKL,MRPS6,ST6GALNAC3,PLIN2,NFKBIA,APOL1,PLOD2,ARHGAP11A,ANO6,CYTB,IQGAP1,RGCC,SLFN11,GIMAP8,ND1,NEK7,TP53INP1,ITGB1,CSF1,ANXA5,TBC1D8B,KIF5B,ITPKB,PLSCR1,ANXA1,FAM241A,PMP2,LEF1,NOSTRIN,ITGA8,MLANA,CLEC2D,SYNE2,CD2AP,REST,ELK3,PGR,VIM,XAF1,GIMAP6,DDX58,TGFB3,MARCHF3,SASH1,AHNAK,PPP1R3B,S1PR3,ZBED6,RP2                                                                                                                                       |
| GO:0060089 | MF | molecular transducer activity | 0.005140349 | 2.289007434 | 55 | TOP2A,CEP55,RRM2,HJURP,ND C80,BCL2A1,STC1,MCM10,TLR8,SERPINA1,CDA,CCR5,GBP1,GBP5,GBP2,HPGD,S100A4,HGF,TRIP10,TLR2,TBX15,CLEC2B,CENPF,PIK3AP1,TRIM5,JAML,E2F7,ALOX5AP,S100A11,FCER1G,IFI16,NMI,LCP1,TLR1,GBP3,TRIM38,SP100,BRCA2,PIK3CG,GIMAP7,GBP4,ITGB3,GIMAP2,TNFSF10,BTK,TRIM21,NQO1,B2M,ANXA2,MECOM,IRAK3,HHEX,MSTN,DBI,MEFV,ROM1,IFIH1,TPD52L1,BCL6,WWTR1,TRIM22,CLDN18,CFH,ZNF69,CASP6,MYD88,CH EK2,MLKL,NFKBIA,CSF1,KIF5B,ANXA1,SAMHD1,CD2AP,PGR,VIM,DDX58,TGFB3,AHNAK,LRP4 |
|            |    |                               |             |             |    | MELK,OR7A5,OR7C1,FPR2,TLR8,OR52B6,CCR5,TTK,NOD2,HPGD,OR51B5,KLRC3,FCGR3A,TLR7,TNFRSF10D,TLR5,TLR2,PTPRC,IL2RG,TRIM5,FCGR2A,CYSLTR2,P2RY6,FCER1G,ADGRL4,SYK,LY75,IL17RB,GPR4,SPN,TLR1,GABRE,CELSR1,OSMR,CSF3R,ITGB3,PTAFR,YES1,BTK,ADGRE2,FLT1,TGFBR1,GPR160,CD302,DDR2,TGFBR2,IL13RA1,ITGB8,ITGB1,LPAR6,LEF1,CLEC2D,PGR,TSHR,S1PR3                                                                                                                                                 |

**Table 3** The enriched pathway terms of the up and down regulated differentially expressed genes

| Pathway ID                | Pathway Name                          | Adjusted p value | Negative log <sub>10</sub> of adjusted p value | Gene Count | Gene                                                                                                                                                                                                                                         |
|---------------------------|---------------------------------------|------------------|------------------------------------------------|------------|----------------------------------------------------------------------------------------------------------------------------------------------------------------------------------------------------------------------------------------------|
| <b>Up regulated genes</b> |                                       |                  |                                                |            |                                                                                                                                                                                                                                              |
| REAC:R-HSA-112316         | Neuronal System                       | 1.02E-11         | 10.98934789                                    | 37         | GNG3,HTR3B,KCNF1,NCALD,SLC32A1,KCNH4,CHRNA7,GJD2,STX1A,NRGN,TUBB2A,GNG13,SLC1A6,KCNK3,IL1RAPL2,TUBA1B,CACNB1,CAMKK2,SYT12,VAMP2,KCNB2,TUBA4A,CAMK4,CACNG3,PRKCG,PRKAR1B,NG4,CAMK1,KIF17,RAB3A,STXBP1,CHRN2,SLC17A7,ARHGEF9,GABRG2,DLG3,KCNS2 |
| REAC:R-HSA-112315         | Transmission across Chemical Synapses | 2.64E-10         | 9.578744597                                    | 28         | GNG3,HTR3B,NCALD,SLC32A1,CHRNA7,STX1A,NRGN,TUBB2                                                                                                                                                                                             |

|                             |                                        |             |             |    |                                                                                                                                                                                                                                                                                                                                                                                                                                                                                                                                                                                                                                                      |
|-----------------------------|----------------------------------------|-------------|-------------|----|------------------------------------------------------------------------------------------------------------------------------------------------------------------------------------------------------------------------------------------------------------------------------------------------------------------------------------------------------------------------------------------------------------------------------------------------------------------------------------------------------------------------------------------------------------------------------------------------------------------------------------------------------|
| REAC:R-HSA-187037           | Signaling by NTRK1 (TRKA)              | 0.008665023 | 2.062230269 | 10 | A,GNG13,SLC1A6,TUBA1B,CACNB1,CAMKK2,VAMP2,TUBA4A,CAMK4,CACNG3,PRKCG,PRKAR1B,GNG4,CAMK1,KIF17,RAB3A,CHRN2,SLC17A7,ARHGEP9,GABRG2,DLG3                                                                                                                                                                                                                                                                                                                                                                                                                                                                                                                 |
| REAC:R-HSA-5576891          | Cardiac conduction                     | 0.016791344 | 1.774914548 | 10 | EGR2,EGR1,ARC,ADCYAP1,CDK5R2,PPP2R1A,MEF2D,DNAL4,AP2M1,CDK5                                                                                                                                                                                                                                                                                                                                                                                                                                                                                                                                                                                          |
| REAC:R-HSA-372790           | Signaling by GPCR                      | 0.022140035 | 1.654821703 | 40 | SCN5A,KCNK3,SLC8A2,CACNB1,SCN3B,FXYP7,KCNIP3,SCN2B,ATP1A3,SLC8A3                                                                                                                                                                                                                                                                                                                                                                                                                                                                                                                                                                                     |
| REAC:R-HSA-9006934          | Signaling by Receptor Tyrosine Kinases | 0.058821515 | 1.230463795 | 20 | NMBR,PNOC,GNG3,WNT1,RGS8,CCKBR,NPBWR2,ADCYAP1,HTR2C,RBP4,FFAR4,SDR9C7,ADR1D,PPEF1,MCHR2,PLPPR3,CHRM4,CHRM1,GRM2,OPRL1,CCK, GNG13, WNT10B, RGS4, NGEF, C AMKK2, PAK1, CAMK4, VIPR1, PP2R1A, PRKCG, CX3CL1, PRKAR1B, ADRA1B, GNG4, RBP2, ARHGEF9, XK, CDK5, HTR5A                                                                                                                                                                                                                                                                                                                                                                                      |
| <b>Down regulated genes</b> |                                        |             |             |    |                                                                                                                                                                                                                                                                                                                                                                                                                                                                                                                                                                                                                                                      |
| REAC:R-HSA-168256           | Immune System                          | 1.91E-09    | 8.718362079 | 97 | EGR2,EGR1,ARC,ADCYAP1,SPI NT2,CDK5R2,ATP6V0E2,PAK1,PTPN3,ATP6V0B,PPP2R1A,LAMB3,MEF2D,DNAL4,TRIB3,ATP6V1B2,AP2M1,ATP6AP1,CDK5,GABRG2                                                                                                                                                                                                                                                                                                                                                                                                                                                                                                                  |
| REAC:R-HSA-1280215          | Cytokine Signaling in Immune system    | 3.8871E-06  | 5.410373893 | 43 | VNN1,CHI3L1,IL9,FPR2,S100A9,TLR8,SERPINA1,CDA,CCR5,NOD2,PLAC8,GBP1,GBP5,GBP2,C7, MGAM, CD180, KIF20A, FCGR3A, TLR7, FYB1, HGF, TLR5, TLR2, MNDA, PTPRC, C3, IL2RG, CLEC2B, CFI, PIK3AP1, TRIM5, JAML, FCGR2A, S100A11, FCER1G, MICB, IFI16, SELL, CASP4, SYK, CGAS, LCP1, MT2A, IL17RB, DTX3L, CYBB, TLR1, NCKAP1L, GBP3, TRIM38, SP100, OSMR, SLA, NFATC2, GBP4, CSF3R, MAP3K8, PTAFR, YES1, NCF2, CD58, BTK, TRIM21, B2M, ANXA2, IRAK3, CTSS, HEBP2, IFITM3, DOCK2, NEDD4, MEFV, IFIH1, BCL6, HERC5, OAS2, TRIM22, NLR3, CFH, BTNL9, DOK3, LCP2, MYD88, NFKBIA, ANO6, IL13RA1, IQGAP1, ITGB1, CSF1, KIF5B, ANXA1, SAMHD1, CLEC2D, VIM, XAF1, DDX58 |
| REAC:R-HSA-913531           | Interferon Signaling                   | 7.42255E-06 | 5.129446658 | 20 | IL9,CCR5,NOD2,GBP1,GBP5,GBP2,HGF,IL2RG,TRIM5,SYK,LCP1,MT2A,IL17RB,GBP3,TRIM38,SP100,OSMR,SLA,GBP4,CSF3R,MAP3K8,PTAFR,YES1,TRIM21,B2M,ANXA2,IRAK3,IFITM3,NEDD4,BCL6,HERC5,OAS2,TRIM22,MYD88,NFKBIA,IL13RA1,ITGB1,CSF1,ANXA1,SAMHD1,VIM,XAF1,DDX58                                                                                                                                                                                                                                                                                                                                                                                                     |
| REAC:R-HSA-168898           | Toll-like Receptor Cascades            | 0.0014753   | 2.831119584 | 14 | GBP1,GBP5,GBP2,TRIM5,MT2A,GBP3,TRIM38,SP100,GBP4,PTAFR,TRIM21,B2M,IFITM3,NEDD4,HERC5,OAS2,TRIM22,SAMHD1,XAF1,DDX58                                                                                                                                                                                                                                                                                                                                                                                                                                                                                                                                   |
| REAC:R-HSA-109582           | Hemostasis                             | 0.038318795 | 1.416588151 | 30 | S100A9,TLR8,NOD2,CD180,TLR7,TLR5,TLR2,TLR1,MAP3K8,BTK,IRAK3,CTSS,MYD88,NFKBIA,ANGPT2,MMRN1,SERPINA1,KI                                                                                                                                                                                                                                                                                                                                                                                                                                                                                                                                               |

|                   |                    |             |             |    |                                                                                                                                                                                                                                                               |
|-------------------|--------------------|-------------|-------------|----|---------------------------------------------------------------------------------------------------------------------------------------------------------------------------------------------------------------------------------------------------------------|
| REAC:R-HSA-397014 | Muscle contraction | 0.071675415 | 1.144629782 | 12 | F20A,TNFRSF10D,HGF,TFPI,JA<br>ML,FCER1G,SELL,SYK,SPN,SR<br>GN,APBB1IP,MAFF,PIK3CG,ITG<br>B3,CDK2,YES1,CD58,ITGA10,A<br>NXA2,GNG11,ITGA1,DOCK2,LC<br>P2,ITGB1,ANXA5,KIF5B,TGFB3<br>KCNE4,SCN4A,NEB,FGF11,TRD<br>N,ANXA2,CALD1,ITGA1,WWTR<br>1,MYL12A,ANXA1,VIM |
|-------------------|--------------------|-------------|-------------|----|---------------------------------------------------------------------------------------------------------------------------------------------------------------------------------------------------------------------------------------------------------------|

**Table 4** Topology table for up and down regulated genes.

| Regulation | Node      | Degree | Betweenness | Stress   | Closeness |
|------------|-----------|--------|-------------|----------|-----------|
| Up         | OTUB1     | 168    | 0.07141     | 9945498  | 0.319279  |
| Up         | PPP2R1A   | 167    | 0.082265    | 13013540 | 0.330066  |
| Up         | AP2M1     | 124    | 0.042956    | 12345552 | 0.301153  |
| Up         | PIN1      | 121    | 0.055885    | 9510528  | 0.322668  |
| Up         | USP11     | 98     | 0.036757    | 7849042  | 0.298812  |
| Up         | MAP1LC3A  | 84     | 0.02886     | 3940580  | 0.301354  |
| Up         | SPINT2    | 70     | 0.029283    | 4295274  | 0.270554  |
| Up         | CDK5      | 65     | 0.019983    | 3668464  | 0.300842  |
| Up         | TUBA4A    | 64     | 0.027425    | 4267060  | 0.315814  |
| Up         | GABARAPL1 | 61     | 0.013241    | 1769776  | 0.278602  |
| Up         | SCN2B     | 57     | 0.020358    | 2474674  | 0.244552  |
| Up         | DLG3      | 54     | 0.022883    | 2212964  | 0.269017  |
| Up         | PAK1      | 54     | 0.015822    | 2630050  | 0.302383  |
| Up         | EMD       | 54     | 0.017582    | 3156228  | 0.296205  |
| Up         | COPS7A    | 52     | 0.015587    | 4080222  | 0.267621  |
| Up         | STX1A     | 50     | 0.015161    | 1961900  | 0.269534  |
| Up         | PSMB5     | 50     | 0.016229    | 3697432  | 0.280733  |
| Up         | ATP5F1B   | 50     | 0.020934    | 3474666  | 0.294641  |
| Up         | SNRPB     | 48     | 0.017132    | 3542636  | 0.265788  |
| Up         | RET       | 47     | 0.014483    | 2395004  | 0.294556  |
| Up         | PPEF1     | 46     | 0.01187     | 1436250  | 0.281062  |
| Up         | NDN       | 45     | 0.014736    | 3118374  | 0.280385  |
| Up         | NIPSNAP1  | 43     | 0.012181    | 2808016  | 0.273606  |
| Up         | CCNA1     | 40     | 0.005324    | 731796   | 0.291     |
| Up         | MAST3     | 39     | 0.012072    | 2038396  | 0.266396  |
| Up         | STXBP1    | 37     | 0.012163    | 1488860  | 0.277086  |
| Up         | TIMM13    | 37     | 0.010596    | 2545900  | 0.27414   |
| Up         | EXOSC5    | 35     | 0.010651    | 2802368  | 0.244362  |
| Up         | TUBB2A    | 35     | 0.011719    | 1761072  | 0.297503  |
| Up         | PTPN3     | 34     | 0.010358    | 2507486  | 0.272072  |
| Up         | ATP6V1B2  | 32     | 0.008845    | 1266236  | 0.272527  |
| Up         | PRMT8     | 30     | 0.008639    | 981910   | 0.270356  |
| Up         | PLK2      | 30     | 0.011608    | 1925362  | 0.24667   |
| Up         | EGR1      | 29     | 0.006593    | 1374190  | 0.280443  |
| Up         | TUBA1B    | 29     | 0.007247    | 1515320  | 0.295925  |
| Up         | VAMP2     | 27     | 0.004698    | 582590   | 0.239915  |
| Up         | RAB3A     | 27     | 0.010134    | 2372496  | 0.245644  |
| Up         | NME1      | 27     | 0.007847    | 1040722  | 0.264907  |
| Up         | CHCHD2    | 27     | 0.008993    | 1710698  | 0.232747  |
| Up         | TRIB3     | 23     | 0.008231    | 938710   | 0.282211  |
| Up         | NAPA      | 22     | 0.006186    | 1166566  | 0.252839  |
| Up         | FAM83H    | 22     | 0.005418    | 1210472  | 0.259987  |
| Up         | CAMKK2    | 22     | 0.005092    | 971692   | 0.265234  |
| Up         | KLHDC3    | 22     | 0.006703    | 648526   | 0.23858   |
| Up         | PTPN5     | 21     | 0.00367     | 504710   | 0.259259  |
| Up         | LAMB3     | 21     | 0.004804    | 1502760  | 0.23686   |
| Up         | GAS7      | 20     | 0.004451    | 848144   | 0.246252  |
| Up         | CORO1A    | 20     | 0.006302    | 1121082  | 0.231136  |
| Up         | HIPK4     | 20     | 0.004399    | 996272   | 0.237967  |
| Up         | PTPRN     | 19     | 0.004817    | 912066   | 0.214998  |
| Up         | PPL       | 18     | 0.006724    | 426754   | 0.263485  |
| Up         | ADCYAP1   | 18     | 0.005602    | 1085272  | 0.212886  |
| Up         | SLC4A1    | 18     | 0.005619    | 445156   | 0.255151  |
| Up         | MYLK2     | 17     | 0.00398     | 664800   | 0.269498  |
| Up         | SNU13     | 16     | 0.003591    | 1087894  | 0.251466  |

|    |         |    |          |        |          |
|----|---------|----|----------|--------|----------|
| Up | MEF2D   | 16 | 0.002058 | 614922 | 0.266728 |
| Up | ASS1    | 16 | 0.003131 | 560618 | 0.261405 |
| Up | SCN5A   | 15 | 0.004508 | 390980 | 0.23952  |
| Up | PRKCG   | 15 | 0.004037 | 332602 | 0.267621 |
| Up | HSPBP1  | 15 | 0.00325  | 742384 | 0.237551 |
| Up | INTS5   | 15 | 0.003351 | 241056 | 0.26398  |
| Up | HINT1   | 14 | 0.002383 | 290694 | 0.258453 |
| Up | PAK6    | 14 | 0.001919 | 553154 | 0.269373 |
| Up | CRY2    | 14 | 0.003031 | 307230 | 0.246252 |
| Up | CYC1    | 14 | 0.004055 | 978962 | 0.243573 |
| Up | CAMK1   | 14 | 0.002831 | 379528 | 0.251917 |
| Up | GPRASP2 | 14 | 0.002978 | 563876 | 0.243792 |
| Up | NDUFA4  | 14 | 0.003771 | 399940 | 0.266658 |
| Up | PRKAR1B | 13 | 0.0022   | 523610 | 0.24667  |
| Up | KRT5    | 13 | 0.003521 | 627862 | 0.27656  |
| Up | PHYHIP  | 13 | 0.00362  | 561040 | 0.216944 |
| Up | ARF5    | 12 | 0.003859 | 494656 | 0.212975 |
| Up | POP7    | 12 | 0.002996 | 432912 | 0.227204 |
| Up | STX1B   | 12 | 3.31E-04 | 66908  | 0.224389 |
| Up | CIRBP   | 12 | 0.002706 | 467172 | 0.250986 |
| Up | NELL1   | 12 | 0.002712 | 581170 | 0.246044 |
| Up | TRAPPC1 | 11 | 0.00397  | 882746 | 0.184086 |
| Up | SYP     | 11 | 0.001445 | 234918 | 0.243864 |
| Up | PEF1    | 11 | 0.001809 | 383856 | 0.228005 |
| Up | PSMG3   | 10 | 0.001161 | 238338 | 0.213187 |
| Up | TARBP1  | 10 | 0.003381 | 362168 | 0.238287 |
| Up | CDIPT   | 10 | 0.0014   | 237860 | 0.259292 |
| Up | KATNB1  | 9  | 0.002492 | 275332 | 0.205529 |
| Up | IGSF8   | 9  | 0.002966 | 701636 | 0.191736 |
| Up | ACTL6B  | 9  | 6.02E-04 | 101388 | 0.211241 |
| Up | HPCAL1  | 9  | 0.00147  | 350022 | 0.241394 |
| Up | TRIM54  | 8  | 0.00155  | 305518 | 0.214162 |
| Up | RBM3    | 8  | 7.73E-04 | 171472 | 0.2309   |
| Up | ENO2    | 8  | 9.07E-04 | 131346 | 0.2548   |
| Up | KLHL26  | 8  | 0.002463 | 371158 | 0.207592 |
| Up | HTR2C   | 7  | 6.15E-04 | 114798 | 0.210488 |
| Up | EFNB3   | 7  | 1        | 20     | 1        |
| Up | PYCR3   | 7  | 0.001488 | 198522 | 0.202798 |
| Up | ATP6AP1 | 7  | 8.04E-04 | 199204 | 0.239028 |
| Up | DDX28   | 7  | 0.001597 | 287238 | 0.218821 |
| Up | DCTPP1  | 7  | 6.56E-04 | 103376 | 0.229456 |
| Up | ACOT7   | 7  | 0.001071 | 297560 | 0.220789 |
| Up | MICOS13 | 7  | 7.84E-04 | 158776 | 0.234259 |
| Up | NPM3    | 6  | 0.001048 | 226888 | 0.248581 |
| Up | ASB2    | 6  | 2.67E-04 | 49820  | 0.238455 |
| Up | VIPR1   | 6  | 0.00197  | 151914 | 0.194435 |
| Up | FLG     | 6  | 0.001573 | 242370 | 0.208645 |
| Up | IQCN    | 6  | 0.001674 | 106818 | 0.23819  |
| Up | DUSP4   | 5  | 5.50E-04 | 156260 | 0.223588 |
| Up | CHRM4   | 5  | 9.82E-04 | 193118 | 0.177919 |
| Up | ARL4D   | 4  | 0.001007 | 128230 | 0.209331 |
| Up | GGT7    | 4  | 0.001472 | 214566 | 0.186427 |
| Up | CAMKV   | 4  | 6.47E-06 | 1848   | 0.194788 |
| Up | UNC13A  | 3  | 5.10E-04 | 106484 | 0.181204 |
| Up | PLD3    | 3  | 7.67E-05 | 14284  | 0.219138 |
| Up | CA10    | 3  | 2.18E-04 | 48066  | 0.212664 |
| Up | CDH13   | 3  | 1.17E-06 | 470    | 0.190891 |
| Up | DLK2    | 3  | 1.46E-04 | 4934   | 0.224043 |
| Up | CX3CL1  | 2  | 1.54E-05 | 7966   | 0.227103 |
| Up | FAM234B | 2  | 1.14E-05 | 1280   | 0.183571 |
| Up | CPNE7   | 2  | 4.91E-04 | 50828  | 0.242053 |
| Up | RPH3A   | 1  | 0        | 0      | 0.197212 |
| Up | CITED2  | 1  | 0        | 0      | 0.207624 |
| Up | FIBP    | 1  | 0        | 0      | 0.23128  |
| Up | ADRA1B  | 1  | 0        | 0      | 0.231464 |
| Up | BFSP1   | 1  | 0        | 0      | 0.240666 |
| Up | B4GAT1  | 1  | 0        | 0      | 1        |
| Up | AP1S1   | 1  | 0        | 0      | 0.231464 |
| Up | NUAK1   | 1  | 0        | 0      | 0.222101 |
| Up | PER2    | 1  | 0        | 0      | 0.197604 |

|      |         |     |          |          |          |
|------|---------|-----|----------|----------|----------|
| Up   | SPRYD3  | 1   | 0        | 0        | 0.230079 |
| Up   | SULT4A1 | 1   | 0        | 0        | 0.243967 |
| Up   | KLHL14  | 1   | 0        | 0        | 0.171913 |
| Up   | NAT14   | 1   | 0        | 0        | 0.206498 |
| Up   | FAM241B | 1   | 0        | 0        | 0.150493 |
| Up   | VWA5B2  | 1   | 0        | 0        | 0.197212 |
| Up   | SV2A    | 1   | 0        | 0        | 0.231464 |
| Up   | TAGLN3  | 1   | 0        | 0        | 0.20301  |
| Up   | SDR9C7  | 1   | 0        | 0        | 0.197873 |
| Up   | ATP1A3  | 1   | 0        | 0        | 1        |
| Up   | TSPYL4  | 1   | 0        | 0        | 0.192633 |
| Up   | STOML1  | 1   | 0        | 0        | 0.254673 |
| Up   | PIM2    | 1   | 0        | 0        | 0.215168 |
| Up   | STAT4   | 1   | 0        | 0        | 0.212188 |
| Up   | IER5    | 1   | 0        | 0        | 0.248173 |
| Up   | DOC2A   | 1   | 0        | 0        | 0.216979 |
| Down | CDK2    | 266 | 0.112091 | 26621858 | 0.341664 |
| Down | IQGAP1  | 187 | 0.071324 | 17647666 | 0.327387 |
| Down | NEDD4   | 142 | 0.055443 | 10650202 | 0.320434 |
| Down | VIM     | 128 | 0.054878 | 9003984  | 0.316919 |
| Down | CDK1    | 102 | 0.033728 | 5868324  | 0.326364 |
| Down | YAP1    | 100 | 0.037372 | 6470746  | 0.31601  |
| Down | TEAD2   | 97  | 0.035043 | 4388736  | 0.301644 |
| Down | NFKBIA  | 95  | 0.033392 | 7173334  | 0.310731 |
| Down | IFI16   | 93  | 0.034793 | 7989162  | 0.280193 |
| Down | BCL6    | 92  | 0.033786 | 2993878  | 0.290088 |
| Down | FKBP5   | 80  | 0.024037 | 5754610  | 0.298418 |
| Down | CCNA2   | 79  | 0.021411 | 3068314  | 0.31365  |
| Down | BTBK    | 77  | 0.027655 | 3871414  | 0.306546 |
| Down | SYK     | 77  | 0.025076 | 4962946  | 0.297916 |
| Down | PLSCR1  | 74  | 0.028772 | 5643644  | 0.275979 |
| Down | ITGB1   | 72  | 0.030542 | 6994814  | 0.289244 |
| Down | SUMO4   | 72  | 0.027092 | 4105944  | 0.300797 |
| Down | ACTL6A  | 68  | 0.022131 | 4165820  | 0.270034 |
| Down | TGFBR2  | 60  | 0.016685 | 2909000  | 0.290212 |
| Down | CHEK2   | 59  | 0.017851 | 2485420  | 0.30782  |
| Down | BRCA2   | 57  | 0.018747 | 2368156  | 0.308636 |
| Down | TGFBR1  | 55  | 0.015763 | 2209422  | 0.299361 |
| Down | KIF5B   | 54  | 0.016013 | 4350456  | 0.278907 |
| Down | TOP2A   | 54  | 0.017858 | 4289336  | 0.313505 |
| Down | ANXA2   | 54  | 0.016436 | 4806976  | 0.311135 |
| Down | B2M     | 51  | 0.012509 | 2444652  | 0.242039 |
| Down | YES1    | 51  | 0.01526  | 4218212  | 0.290626 |
| Down | ORC1    | 43  | 0.011657 | 1207704  | 0.286619 |
| Down | ERBIN   | 43  | 0.011431 | 3883630  | 0.281024 |
| Down | PGR     | 43  | 0.011693 | 1392800  | 0.300111 |
| Down | TRIM21  | 43  | 0.013054 | 2650410  | 0.296917 |
| Down | MYD88   | 41  | 0.011462 | 1404158  | 0.27735  |
| Down | SGO1    | 40  | 0.012421 | 1088650  | 0.279962 |
| Down | FOXC1   | 40  | 0.011349 | 1155294  | 0.28674  |
| Down | PTPRC   | 38  | 0.008059 | 2799532  | 0.266449 |
| Down | S100A4  | 37  | 0.011593 | 1114180  | 0.299009 |
| Down | MCM10   | 36  | 0.004682 | 1557502  | 0.269998 |
| Down | CD2AP   | 35  | 0.006407 | 910094   | 0.279328 |
| Down | NDC80   | 35  | 0.006414 | 2318512  | 0.264528 |
| Down | GLI1    | 35  | 0.009183 | 2015686  | 0.271184 |
| Down | NMI     | 35  | 0.010002 | 2515616  | 0.26932  |
| Down | ANXA1   | 33  | 0.016364 | 2992794  | 0.294194 |
| Down | ITGB3   | 32  | 0.005582 | 1573674  | 0.271256 |
| Down | CASP7   | 32  | 0.006895 | 828298   | 0.274862 |
| Down | MKI67   | 32  | 0.010358 | 1696668  | 0.287104 |
| Down | NOD2    | 31  | 0.009377 | 882872   | 0.264031 |
| Down | CEP55   | 31  | 0.017614 | 4100306  | 0.261422 |
| Down | LEF1    | 30  | 0.007168 | 2170294  | 0.26727  |
| Down | LCP2    | 30  | 0.006378 | 1286260  | 0.271293 |
| Down | DDX58   | 30  | 0.006811 | 1896598  | 0.249281 |
| Down | HGF     | 30  | 0.005518 | 1003412  | 0.279692 |
| Down | CASP4   | 30  | 0.008429 | 688954   | 0.279328 |
| Down | RASSF8  | 29  | 0.007814 | 1008256  | 0.270824 |
| Down | TRIP10  | 28  | 0.00737  | 2156390  | 0.251621 |



|      |           |    |          |         |          |
|------|-----------|----|----------|---------|----------|
| Down | NFATC2    | 28 | 0.007579 | 920916  | 0.295389 |
| Down | RP2       | 27 | 0.008128 | 1628202 | 0.227496 |
| Down | KIF20A    | 26 | 0.008819 | 2742112 | 0.25173  |
| Down | WWTR1     | 26 | 0.004113 | 721282  | 0.283724 |
| Down | LPAR6     | 26 | 0.011845 | 2466340 | 0.220264 |
| Down | TES       | 25 | 0.004245 | 598836  | 0.278336 |
| Down | SERPINA1  | 25 | 0.009865 | 1353946 | 0.247119 |
| Down | SYNE2     | 24 | 0.006627 | 675844  | 0.27501  |
| Down | KNL1      | 24 | 0.004511 | 1066872 | 0.268167 |
| Down | SP100     | 23 | 0.005003 | 1130392 | 0.261691 |
| Down | SAMHD1    | 23 | 0.005744 | 833346  | 0.281276 |
| Down | AHNAK     | 22 | 0.00364  | 1474678 | 0.287428 |
| Down | GABRE     | 22 | 0.009836 | 2200408 | 0.177146 |
| Down | S100A9    | 21 | 0.004273 | 605884  | 0.285494 |
| Down | MYL12A    | 21 | 0.002684 | 1025554 | 0.260419 |
| Down | ND1       | 21 | 0.006153 | 965560  | 0.218433 |
| Down | LIPH      | 21 | 0.009326 | 1429872 | 0.216299 |
| Down | REST      | 20 | 0.004416 | 1144470 | 0.253043 |
| Down | FLT1      | 20 | 0.004803 | 683518  | 0.260736 |
| Down | RUNX3     | 20 | 0.002903 | 501702  | 0.274917 |
| Down | TSHR      | 20 | 0.006063 | 955592  | 0.270428 |
| Down | CPVL      | 20 | 0.005358 | 573972  | 0.26022  |
| Down | CCR5      | 19 | 0.004161 | 975644  | 0.24318  |
| Down | C3        | 19 | 0.007227 | 1504884 | 0.20903  |
| Down | HERC5     | 19 | 0.003223 | 625504  | 0.273331 |
| Down | MAP3K8    | 18 | 0.002347 | 347442  | 0.274048 |
| Down | CALD1     | 18 | 0.004685 | 677158  | 0.281743 |
| Down | TTK       | 18 | 0.003774 | 597730  | 0.275661 |
| Down | FBXO5     | 17 | 0.003569 | 1006980 | 0.248339 |
| Down | CENPF     | 17 | 0.003746 | 374014  | 0.265062 |
| Down | NEB       | 16 | 0.003044 | 834378  | 0.238776 |
| Down | CASP6     | 16 | 0.002255 | 210662  | 0.258765 |
| Down | SPP1      | 16 | 0.003428 | 363174  | 0.254022 |
| Down | KIF14     | 16 | 0.00576  | 601548  | 0.233307 |
| Down | HK2       | 16 | 0.004074 | 729230  | 0.249007 |
| Down | BAZ1A     | 15 | 0.003258 | 421200  | 0.255023 |
| Down | TLR2      | 15 | 0.003171 | 337512  | 0.257815 |
| Down | ANXA5     | 15 | 0.003129 | 753934  | 0.252808 |
| Down | NEXN      | 15 | 8.37E-04 | 178902  | 0.264322 |
| Down | CLIC1     | 15 | 0.002321 | 309010  | 0.279846 |
| Down | RRM2      | 13 | 0.003003 | 323748  | 0.264391 |
| Down | COX2      | 13 | 0.003251 | 687014  | 0.263741 |
| Down | IFIH1     | 12 | 0.001826 | 370462  | 0.208613 |
| Down | TRIM5     | 12 | 0.002144 | 1016118 | 0.230209 |
| Down | HMMR      | 12 | 0.002047 | 362910  | 0.257538 |
| Down | DTX3L     | 11 | 0.001543 | 464720  | 0.228684 |
| Down | TFAP2C    | 10 | 0.002285 | 556108  | 0.26201  |
| Down | DIAPH3    | 10 | 0.005234 | 680428  | 0.251249 |
| Down | CEP152    | 9  | 0.001965 | 408206  | 0.225033 |
| Down | MELK      | 9  | 0.004174 | 1114356 | 0.232773 |
| Down | PLOD2     | 7  | 0.001043 | 178040  | 0.204827 |
| Down | IKBIP     | 7  | 0.002459 | 394590  | 0.220622 |
| Down | TNFRSF10D | 6  | 0.00149  | 186350  | 0.202848 |
| Down | NEFH      | 6  | 0.001017 | 308984  | 0.222757 |
| Down | SINHCAF   | 5  | 0.001187 | 271076  | 0.216208 |
| Down | TRDN      | 4  | 1        | 12      | 1        |
| Down | CCDC146   | 4  | 8.82E-04 | 173322  | 0.214477 |
| Down | MNDA      | 3  | 5.08E-04 | 61158   | 0.192488 |
| Down | TGFB3     | 2  | 0        | 0       | 0.23627  |
| Down | ZIC2      | 2  | 1.04E-04 | 21644   | 0.236723 |
| Down | CDA       | 2  | 4.91E-04 | 55536   | 0.195358 |
| Down | APBB1IP   | 2  | 6.83E-05 | 18040   | 0.222113 |
| Down | RHOJ      | 1  | 0        | 0       | 0.23219  |
| Down | CFH       | 1  | 0        | 0       | 0.172898 |
| Down | FCGR2A    | 1  | 0        | 0       | 0.229547 |
| Down | CFI       | 1  | 0        | 0       | 0.172898 |
| Down | S100A11   | 1  | 0        | 0       | 0.227331 |
| Down | FYB1      | 1  | 0        | 0       | 0.21341  |
| Down | TNFSF10   | 1  | 0        | 0       | 0.168647 |
| Down | PARP9     | 1  | 0        | 0       | 0.186129 |

|      |            |   |   |   |          |
|------|------------|---|---|---|----------|
| Down | TLR1       | 1 | 0 | 0 | 0.204981 |
| Down | FCER1G     | 1 | 0 | 0 | 0.229547 |
| Down | RGCC       | 1 | 0 | 0 | 0.246074 |
| Down | CLEC2D     | 1 | 0 | 0 | 1        |
| Down | LAPTM5     | 1 | 0 | 0 | 0.242688 |
| Down | ITGA8      | 1 | 0 | 0 | 0.224364 |
| Down | ITGA10     | 1 | 0 | 0 | 0.224364 |
| Down | TLR5       | 1 | 0 | 0 | 0.217141 |
| Down | SLA        | 1 | 0 | 0 | 0.229547 |
| Down | GBP2       | 1 | 0 | 0 | 0.191673 |
| Down | RHOQ       | 1 | 0 | 0 | 0.201046 |
| Down | MLANA      | 1 | 0 | 0 | 0.242688 |
| Down | LRRC1      | 1 | 0 | 0 | 0.219386 |
| Down | ITGA1      | 1 | 0 | 0 | 0.224364 |
| Down | ANGPT2     | 1 | 0 | 0 | 0.224364 |
| Down | IRAK3      | 1 | 0 | 0 | 0.217141 |
| Down | HELB       | 1 | 0 | 0 | 0.238776 |
| Down | SLC7A2     | 1 | 0 | 0 | 0.150493 |
| Down | PRRG4      | 1 | 0 | 0 | 0.240141 |
| Down | CYYR1      | 1 | 0 | 0 | 0.240141 |
| Down | TP53INP1   | 1 | 0 | 0 | 0.231583 |
| Down | TRIM38     | 1 | 0 | 0 | 0.216979 |
| Down | CSF3R      | 1 | 0 | 0 | 0.229547 |
| Down | TLR7       | 1 | 0 | 0 | 0.217141 |
| Down | ST6GALNAC3 | 1 | 0 | 0 | 0.201235 |
| Down | PIK3CG     | 1 | 0 | 0 | 0.217908 |
| Down | LRP4       | 1 | 0 | 0 | 0.196385 |
| Down | NABP1      | 1 | 0 | 0 | 0.248173 |
| Down | ARHGAP11A  | 1 | 0 | 0 | 0.246655 |
| Down | CYTB       | 1 | 0 | 0 | 0.195875 |
| Down | DOK3       | 1 | 0 | 0 | 0.227547 |
| Down | NCKAP1L    | 1 | 0 | 0 | 0.197604 |
| Down | ARHGDIB    | 1 | 0 | 0 | 0.215613 |
| Down | CYBB       | 1 | 0 | 0 | 0.246655 |
| Down | IFITM3     | 1 | 0 | 0 | 0.242688 |
| Down | FCGR3A     | 1 | 0 | 0 | 0.229547 |
| Down | NXPE2      | 1 | 0 | 0 | 0.219386 |
| Down | HCLS1      | 1 | 0 | 0 | 0.229547 |

**Table 5** miRNA - target gene and TF - target gene interaction

| Regulation | Target Genes | Degree | MicroRNA        | Regulation | Target Genes | Degree | TF     |
|------------|--------------|--------|-----------------|------------|--------------|--------|--------|
| Up         | AP2M1        | 69     | hsa-mir-3911    | UP         | DLG3         | 17     | FOXC1  |
| Up         | PIN1         | 56     | hsa-mir-199b-5p | UP         | COPS7A       | 15     | IRF2   |
| Up         | PPP2R1A      | 46     | hsa-mir-6779-5p | UP         | GABARAPL1    | 15     | PPARG  |
| Up         | SCN2B        | 46     | hsa-mir-4722-3p | UP         | MAP1LC3A     | 14     | GATA2  |
| Up         | OTUB1        | 45     | hsa-mir-1908-5p | UP         | OTUB1        | 12     | ARID3A |
| Up         | GABARAPL1    | 41     | hsa-mir-545-3p  | UP         | EMD          | 10     | BRCA1  |
| Up         | STX1A        | 33     | hsa-mir-6846-5p | UP         | SCN2B        | 10     | CREB1  |
| Up         | PAK1         | 18     | hsa-mir-7-5p    | UP         | CDK5         | 8      | RELA   |
| Up         | SPINT2       | 9      | hsa-mir-421     | UP         | PIN1         | 8      | SRF    |
| Up         | COPS7A       | 7      | hsa-mir-215-5p  | UP         | PAK1         | 7      | HOXA5  |
| Up         | EMD          | 7      | hsa-mir-124-3p  | UP         | TUBA4A       | 7      | JUN    |
| Up         | DLG3         | 3      | hsa-mir-615-3p  | UP         | PPP2R1A      | 6      | STAT3  |
| Up         | USP11        | 1      | hsa-mir-10a-5p  | UP         | SPINT2       | 4      | TFAP2C |
| Up         | CDK5         | 1      | hsa-mir-155-5p  | UP         | AP2M1        | 3      | YY1    |
| Up         | MAP1LC3A     | 1      | hsa-mir-335-5p  | UP         | USP11        | 2      | EN1    |
| Down       | FKBP5        | 88     | hsa-mir-3654    | Down       | BCL6         | 17     | FOXL1  |
| Down       | CDK2         | 78     | hsa-mir-1296-5p | Down       | FKBP5        | 17     | SREBF1 |
| Down       | PLSCR1       | 75     | hsa-mir-1304-5p | Down       | CDK1         | 14     | NFIC   |
| Down       | YAP1         | 56     | hsa-mir-548d-5p | Down       | CDK2         | 14     | POU2F2 |
| Down       | CDK1         | 52     | hsa-mir-103a-3p | Down       | SYK          | 13     | PRDM1  |
| Down       | CCNA2        | 37     | hsa-mir-19b-3p  | Down       | CCNA2        | 11     | MEF2A  |
| Down       | SYK          | 35     | hsa-mir-486-3p  | Down       | NEDD4        | 11     | FOS    |
| Down       | VIM          | 30     | hsa-mir-4328    | Down       | TEAD2        | 9      | STAT1  |
| Down       | BCL6         | 13     | hsa-mir-30b-5p  | Down       | VIM          | 9      | SOX17  |
| Down       | IQGAP1       | 12     | hsa-mir-136-3p  | Down       | YAP1         | 9      | ELK4   |
| Down       | NFKBIA       | 10     | hsa-mir-381-3p  | Down       | IFI16        | 8      | JUND   |



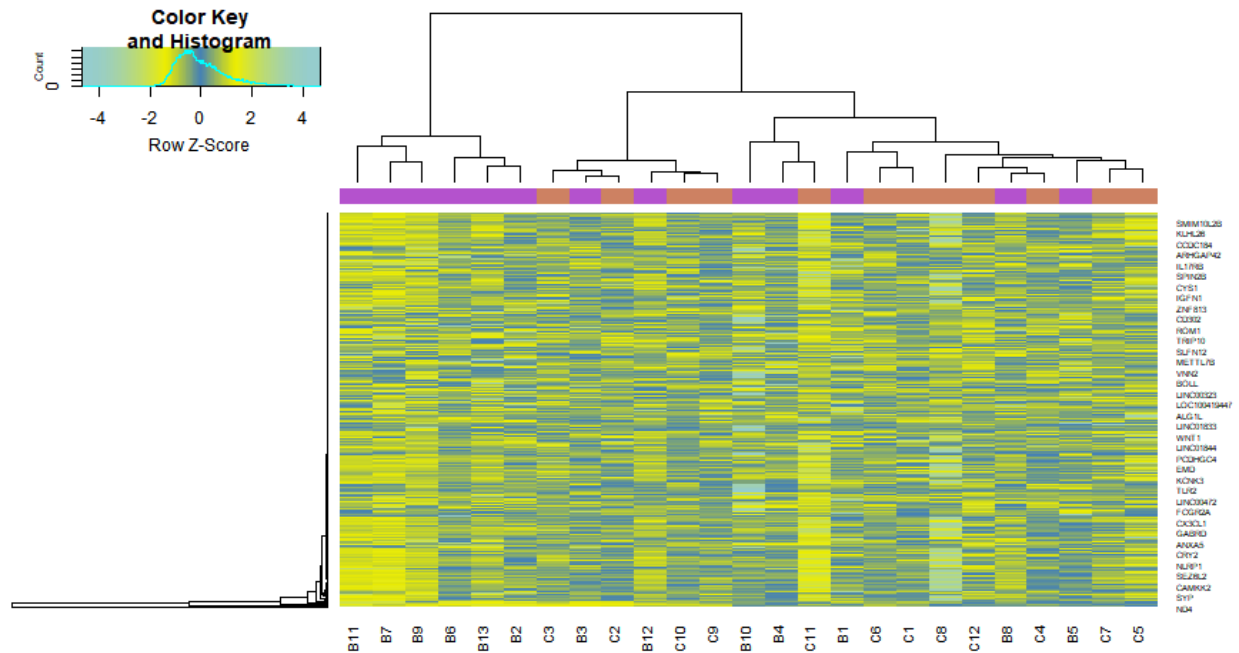

**Fig. 2.** Heat map of differentially expressed genes. Legend on the top left indicate log fold change of genes. (A1 – A37 = normal control samples; B1 – B47 = HF samples)

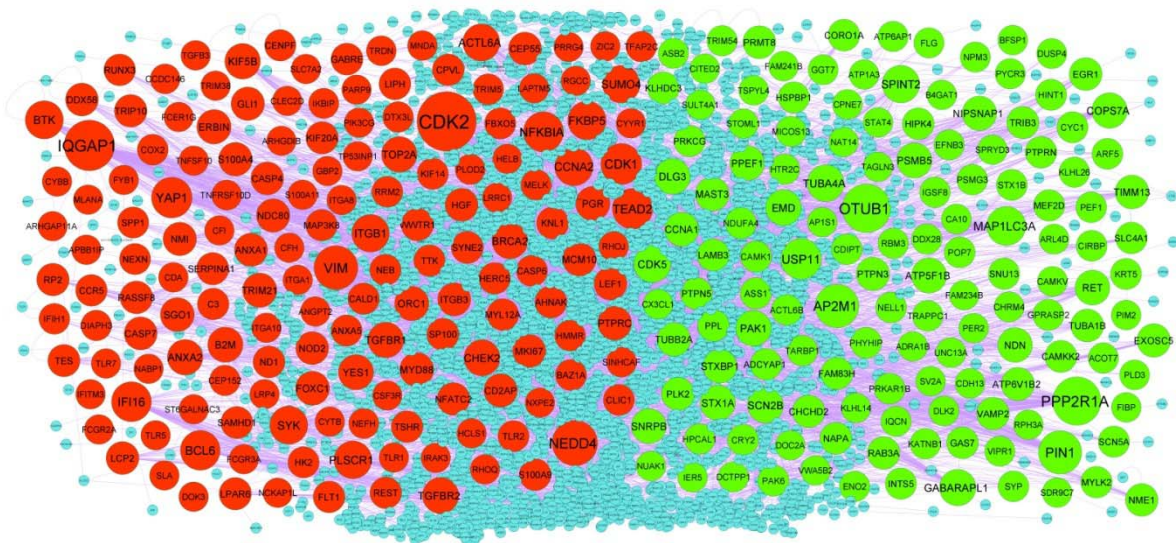

**Fig. 3.** PPI network of DEGs. Up regulated genes are marked in green; down regulated genes are marked in red



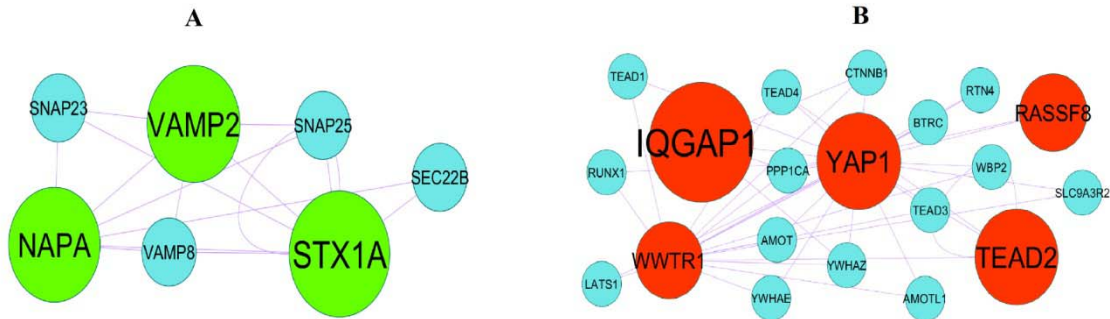

**Fig. 4.** Modules of isolated form PPI of DEGs. (A) The most significant module was obtained from PPI network with 7 nodes and 15 edges for up regulated genes (B) The most significant module was obtained from PPI network with 20 nodes and 41 edges for down regulated genes. Up regulated genes are marked in green; down regulated genes are marked in red

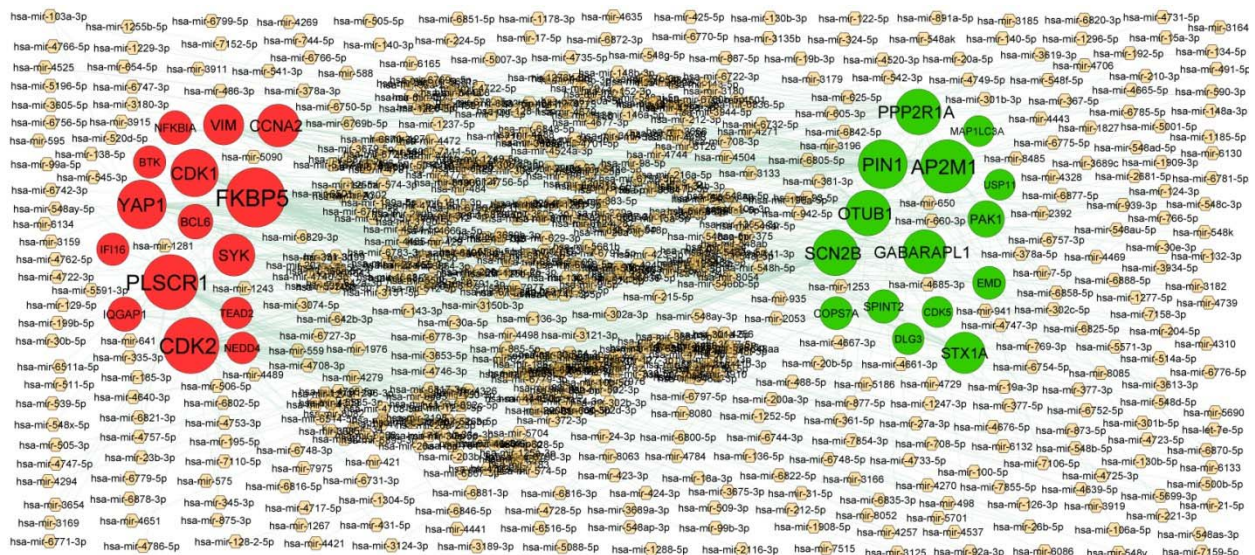

**Fig. 5.** Target gene - miRNA regulatory network between target genes. The orange color diamond nodes represent the key miRNAs; up regulated genes are marked in green; down regulated genes are marked in red.

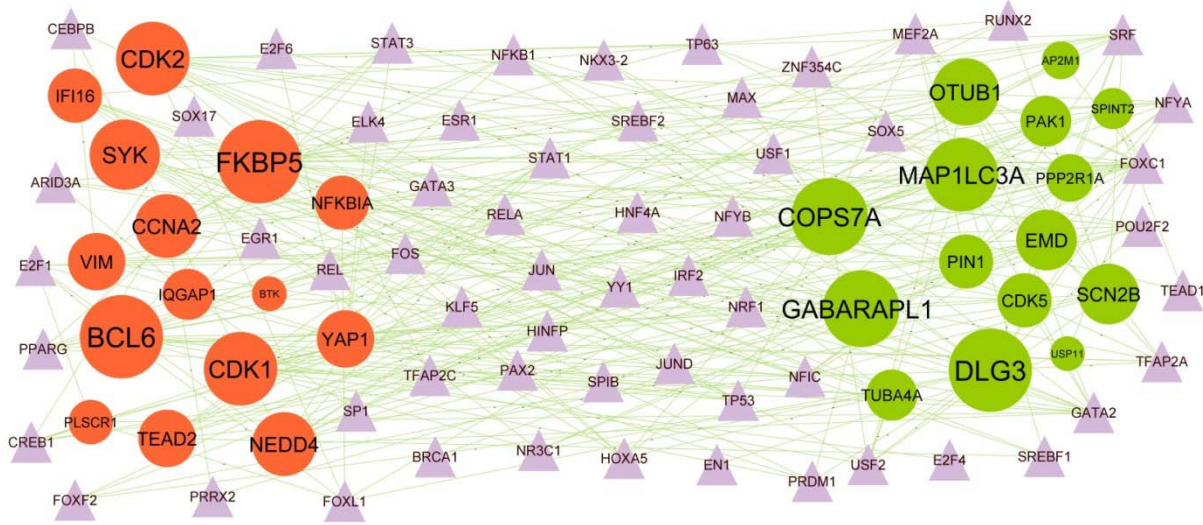

**Fig. 6.** Target gene - TF regulatory network between target genes. The purple color triangle nodes represent the key TFs; up regulated genes are marked in green; down regulated genes are marked in red.

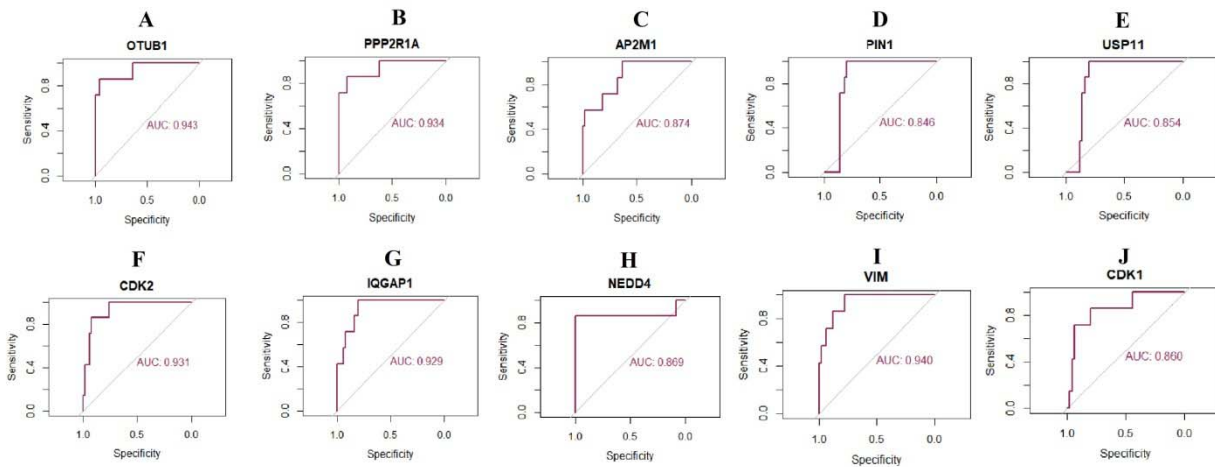

**Fig. 7.** ROC curve analyses of hub genes. A) OTUB1 B) PPP2R1A C) AP2M1 D) PIN1 E) USP11 F) CDK2 G) IQGAP1 H) NEDD4 I) VIM J) CDK1
